# Supplementary material for: Evaluation of Human Milk Microbiota by 16S rRNA Gene Next-Generation Sequencing (NGS) and Cultivation/MALDI-TOF Mass Spectrometry Identification
Source: Front Microbiol. 2019 Nov 15;10:2612. doi: 10.3389/fmicb.2019.02612 (PMC6872673; doi:10.3389/fmicb.2019.02612)
Supplement: Supplementary file 1 [file Data_Sheet_1.xlsx]

## Sheet: List of supplementary tables
Supplementary file 1:
List of supplementary tables:
Table S1:	Overview of the samples metadata.
Table S2:	Abundance of OTU's determined with 16S amplicon NGS.
Table S3:	Relative abundance of each OTU per sample.
Table S4:	Relative abundance of each genera per sample.
Table S5:	Abundance of bacteria in milk samples, detemined with cultivation and MALDI-TOF identification.
Table S6:	Pearson correlation coefficients between the Shannon diversity index and the abundance of specific OTU determined by 16S rRNA gene NGS
Table S7:	Pearson correlation coefficients between the Shannon diversity index and the abundance of specific genus determined by cultivation and MALDI-TOF identification.
Table S8:	Comparison between genus determinations with MALDI-TOF or with 16S Sanger sequencing.
Table S9:	Matching of MALDI-TOF genus identification with 16S Sanger sequencing.
Table S10:	Table S10: Number of bacteria, grown on BA, TSA, WCA-M and Rogosa agars in relation to infant’s consumption of probiotics (Lactobacillus reuteri DSM 17938 or Lactobacillus rhamnosus GG).
Table S11:	Oligotype analysis of reads assigned to Lactobacillus in relation to infant's consumption of probiotics.
Table S12:	Table S12: Translated questionnaire for gaining the metadata of the collected milk samples.

## Sheet: Table S1
Table S1: Overview of the samples metadata*
Sample	Age	Height	Weight	BMI	Delivery_type	Gender	Prob_M	Prob_C	Type_Prob	Breastf_week	Sample_col	Log10_qPCR_Eub			Legend:
s01	31	170	78	26.9896	CS	M	NO	YES	P2	3.57143	PUMP	5.54691			BMI:	Body mass index
s02	29	163	68	25.5937	VD	F	NO	YES	P1	3.14286	PUMP	7.50174			CS:	Caesarean section
s03	30	167	67	24.0238	VD	M	NO	YES	P1	6	MANUAL	3.67468			VD:	Vaginal delivery
s05	41	176	66	21.3068	VD	M	NO	NO	None	8	MANUAL	4.58805			ECS:	Elective Caesarean section
s08	32	173	56	18.7109	VD	M	NO	NO	None	6.42857	MANUAL	3.65725			M:	male
s09	29	162	58	22.1003	VD	F	NO	NO	None	6.57143	PUMP	5.87367			F:	female
s10	30	176	91	29.3776	VD	F	NO	YES	P2	4.57143	MANUAL	5.19756			Prob_M	Mother consumed probiotics
s11	31	175	77	25.1429	VD	F	YES	NO	None	6.57143	MANUAL	3.72428			Prob_C:	Baby consumed probiotics
s12	38	175	79	25.7959	VD	F	NO	NO	None	7.71429	MANUAL	4.87466			Type_Prob:	Type of probiotics that baby consumed
s13	32	174	77	25.4327	VD	M	YES	YES	P2	5.42857	MANUAL	5.16316			P1:	Lactobacillus reuteri DSM 17938
s14	34	168	64	22.6757	VD	M	NO	YES	P1	5.28571	MANUAL	4.77269			P2:	Lactobacillus rhamnosus GG
s15	28	162	62	23.6244	VD	F	NO	NO	None	8.14286	PUMP	6.52035			Breastf_week:	Brestfeeding week
s16	34	168	70	24.8016	VD	F	NO	NO	None	5.71429	MANUAL	4.82975			Sample_col:	Sampling type
s17	28	160	58	22.6562	ECS	F	NO	NO	None	2.71429	MANUAL	5.0799			PUMP:	Usage of breast pump
s18	25	164	66	24.539	VD	M	NO	NO	None	7.71429	PUMP	5.2159			MANUAL:	Manual expression
s19	28	164	67	24.9108	VD	M	YES	NO	None	5.57143	MANUAL	5.29203			Log10_qPCR_Eub:	Log10 of CFU equivavlents, determined by qPCR using Eubacterial primers UNI331F/797R (Nadkarni et al., 2002)
s20	26	173	81	27.0641	VD	M	YES	NO	None	8.14286	MANUAL	4.49541
s21	34	168	65	23.03	VD	M	NO	NO	None	5.71429	PUMP	5.64454
s22	24	160	75	29.2969	VD	M	NO	NO	None	5.85714	MANUAL	4.44075
s23	31	176	75	24.2123	VD	F	YES	YES	P1	7	PUMP	5.35295
s24	35	160	66	25.7812	VD	F	NO	NO	None	4.85714	MANUAL	4.70629
s25	38	168	75	26.5731	CS	F	NO	NO	None	6.28571	MANUAL	4.25382
s26	36	169	73	25.5593	VD	M	YES	YES	P1	7.85714	MANUAL	4.40037
s27	27	167	74	26.5338	VD	M	NO	YES	P1	5.71429	MANUAL	4.17348
s28	31	167	62	22.231	VD	F	NO	NE	None	2.85714	MANUAL	4.78979
s29	32	160	60	23.4375	VD	F	NO	YES	P2	7	MANUAL	4.45071
s30	32	162	64	24.3865	VD	M	NO	NO	None	5.71429	PUMP	5.33626
s31	28	168	88	31.1791	VD	M	YES	NO	None	8	MANUAL	2.85217
s32	36	173	61	20.3816	VD	M	NO	YES	P2	7	MANUAL	3.69434
s33	29	170	68	23.5294	VD	F	NO	NO	None	7.42857	PUMP	4.36192
s34	30	172	65	21.9713	VD	M	NO	NO	None	7.28571	MANUAL	3.7623
*based on the completed questionnaire (Table S12) and qPCR analysis

## Sheet: Table S2
Table S2: Abundance of OTU's determined with 16S amplicon NGS.
Table represents number of reads detected in each sample after quality control….
	Present in at least 65 % of the samples in the analyzed control set
	Present in all samples in analyzed control set
									Experimental control set					Library preparation control set
Group	Size	Phylum	Class	Order	Family	Genus	Experimental contaminant	Library preparation contaminant	enk1	enk2	enk3	enk4	enk5	ink1	ink2	ink3	s01	s02	s03	s05	s07	s08	s09	s10	s11	s12	s13	s14	s15	s16	s17	s18	s19	s20	s21	s22	s23	s24	s25	s26	s27	s28	s29	s30	s31	s32	s33	s34
Otu000001	612614	Firmicutes(100)	Bacilli(100)	Bacillales(100)	Staphylococcaceae(100)	Staphylococcus(100)			62	541	0	0	0	0	1	27	19151	1452	2100	1654	1174	5712	1059	5895	18843	27087	20617	7939	27757	9745	54348	8665	2134	43638	37024	29386	47773	4693	12188	69657	7265	35387	23699	1700	208	37596	21636	24761
Otu000002	352114	Firmicutes(100)	Bacilli(100)	Lactobacillales(100)	Streptococcaceae(100)	Streptococcus(100)			9	0	0	0	0	0	0	0	13284	185	4170	9450	27	3443	6052	51797	3084	27546	3732	2465	159	9775	4509	1867	45216	3808	1937	1035	46553	27577	37160	5865	2586	353	13456	7397	4	4	13145	4449
Otu000003	236135	Firmicutes(100)	Bacilli(100)	Lactobacillales(100)	Streptococcaceae(100)	Streptococcus(100)			311	0	0	0	12	0	0	0	3623	234	10387	2757	53	0	7032	6	4505	3077	7210	30107	211	14336	15124	80	14022	800	661	2836	18324	10680	1465	18815	23837	143	12901	3351	7	2568	16554	9930
Otu000004	97201	Proteobacteria(100)	Gammaproteobacteria(100)	Pseudomonadales(100)	Moraxellaceae(100)	Acinetobacter(100)			2	0	0	26	0	0	0	1	3	37	0	206	1	405	8511	47	99	546	0	0	91	872	6	32671	2	2	9	1357	3	250	17	3	170	28	2041	49773	5	6	5	3
Otu000005	51682	Proteobacteria(100)	Gammaproteobacteria(100)	Pseudomonadales(100)	Moraxellaceae(100)	Acinetobacter(100)			53	0	0	0	0	0	0	0	3	0	0	0	73	0	2	0	0	6	0	0	51464	5	3	6	4	1	1	57	0	1	1	0	2	0	0	0	0	0	0	0
Otu000006	51419	Proteobacteria(100)	Gammaproteobacteria(100)	Pseudomonadales(100)	Pseudomonadaceae(100)	Pseudomonas(97)			8257	955	1450	3775	5498	1	2	1	40	3	2221	1436	890	1988	19	308	3493	452	144	337	8	305	360	163	209	524	59	557	248	544	1577	2031	1025	233	661	338	4876	3196	1315	1917
Otu000007	46008	Firmicutes(100)	Bacilli(100)	Bacillales(100)	Bacillales_Incertae_Sedis_XI(100)	Gemella(100)			0	0	0	0	0	0	0	0	3429	3	22	1131	0	766	20	129	925	392	36	35	2	722	3707	63	9618	1457	10	10	1815	10483	397	1497	1387	529	377	699	0	1	6166	177
Otu000008	27314	Actinobacteria(100)	Actinobacteria(100)	Actinomycetales(100)	Cellulomonadaceae(100)	Cellulomonas(100)			7634	769	663	2493	3378	2	2	0	20	0	563	362	296	669	9	81	865	157	53	125	8	105	115	74	92	282	40	201	115	257	651	1123	425	145	422	57	2575	991	502	992
Otu000009	27153	Actinobacteria(100)	Actinobacteria(100)	Actinomycetales(100)	Microbacteriaceae(100)	Leifsonia(100)			540	118	216	308	168	1	0	0	0	0	137	63	15	90	0	1	344	17	3	4	2	9	21	0	8	48	1	49	18	50	110	107	66	8	16	7	253	182	55	80
Otu000010	18971	Proteobacteria(100)	Betaproteobacteria(100)	Burkholderiales(100)	Oxalobacteraceae(100)	Massilia(99)			793	21	24	429	721	0	0	0	4	1	118	444	89	316	0	26	466	12	12	60	0	46	35	24	12	154	4	19	23	49	145	251	33	10	52	4	696	120	55	158
Otu000011	18350	Actinobacteria(100)	Actinobacteria(100)	Actinomycetales(100)	Micrococcaceae(100)	Rothia(100)			0	0	0	0	0	0	0	0	0	106	1201	168	0	74	1436	139	161	20	634	65	1	175	0	174	1200	5170	137	0	0	3443	138	0	0	1	1512	131	634	1	1015	611
Otu000012	18266	Proteobacteria(100)	Gammaproteobacteria(100)	Enterobacteriales(100)	Enterobacteriaceae(100)	unclassified(95)			101	216	113	104	126	493	63	20	6	8768	15	14	9	46	0	24	87	3	22	271	0	136	4	31	20	0	0	41	12	29	13	74	2	16	68	4246	805	123	40	3
Otu000013	12716	Firmicutes(100)	Bacilli(100)	Lactobacillales(100)	Streptococcaceae(100)	Streptococcus(100)			0	0	0	0	0	0	0	0	0	0	0	0	0	0	0	0	0	0	0	0	0	0	0	1	0	0	12666	0	0	1	0	46	0	0	0	0	0	0	2	0
Otu000014	11375	Firmicutes(100)	Negativicutes(100)	Selenomonadales(100)	Veillonellaceae(100)	Veillonella(100)			0	0	0	0	0	0	0	0	157	71	1	342	0	0	2496	1	268	95	39	0	0	77	160	1	905	0	164	0	141	2823	388	271	148	0	1639	72	0	0	281	835
Otu000015	11314	Proteobacteria(100)	Alphaproteobacteria(100)	Rhizobiales(100)	Brucellaceae(100)	unclassified(98)			0	133	0	0	0	0	0	22	0	2549	44	31	12	0	1	0	0	12	0	4	0	8	1	8357	1	4	0	18	6	1	0	0	0	0	56	49	0	0	5	0
Otu000016	10503	Proteobacteria(100)	Gammaproteobacteria(100)	Pseudomonadales(100)	Moraxellaceae(100)	Acinetobacter(100)			0	0	0	0	0	0	0	0	0	5896	1	1	1	0	0	199	1	20	3	0	7	553	0	44	0	0	7	40	1	57	0	0	5	2	8	3657	0	0	0	0
Otu000017	9610	Proteobacteria(100)	Gammaproteobacteria(100)	Xanthomonadales(100)	Xanthomonadaceae(100)	Stenotrophomonas(100)			0	37	0	0	18	0	0	0	0	1018	1	2	0	0	5550	1	0	0	0	0	1422	11	0	1359	1	0	2	0	1	1	0	0	98	0	0	6	0	0	0	8
Otu000018	7757	Actinobacteria(100)	Actinobacteria(100)	Actinomycetales(100)	Corynebacteriaceae(100)	Corynebacterium(100)			0	0	0	0	0	0	0	0	70	0	4	3	0	0	2	12	655	0	14	14	0	31	40	2	683	1717	65	142	15	37	54	240	3849	0	99	2	0	0	7	0
Otu000019	7435	Actinobacteria(100)	Actinobacteria(100)	Actinomycetales(100)	Corynebacteriaceae(100)	Corynebacterium(100)			0	0	0	0	0	152	0	0	59	3	936	47	0	0	62	86	404	50	574	31	9	119	853	390	748	12	356	74	71	0	29	1087	96	87	560	6	1	76	4	0
Otu000020	5825	Proteobacteria(100)	Gammaproteobacteria(100)	Pseudomonadales(100)	Moraxellaceae(100)	Acinetobacter(100)			0	0	0	0	0	0	0	0	0	0	0	149	0	0	0	0	0	0	0	0	0	1	0	5671	0	0	0	1	1	0	1	0	0	0	0	1	0	0	0	0
Otu000021	5382	Firmicutes(100)	Bacilli(100)	Bacillales(100)	Bacillaceae_1(96)	unclassified(93)			242	67	101	289	280	707	246	61	1	0	152	4	69	73	1	23	274	45	10	44	1	22	15	22	7	43	0	22	8	48	48	145	17	23	62	8	347	159	38	153
Otu000022	5318	Proteobacteria(100)	Gammaproteobacteria(100)	Pseudomonadales(100)	Moraxellaceae(100)	Enhydrobacter(100)			0	24	0	0	0	0	0	3	8	3	0	101	28	120	119	220	0	330	4	0	0	1745	9	48	1	0	10	80	62	64	46	69	61	26	724	1207	0	0	0	6
Otu000023	4501	Bacteroidetes(100)	Flavobacteriia(100)	Flavobacteriales(100)	Flavobacteriaceae(100)	Chryseobacterium(100)			0	0	0	0	0	0	0	0	0	1	0	46	0	0	3	298	0	3	5	0	1	1468	0	0	1	0	12	1328	0	62	0	0	30	0	0	1202	0	0	40	0
Otu000024	3387	Firmicutes(100)	Bacilli(100)	Lactobacillales(100)	Lactobacillaceae(100)	Lactobacillus(100)			124	0	1869	41	1	0	0	0	12	0	55	3	147	66	5	0	121	5	338	0	0	0	16	0	7	0	0	0	0	33	0	0	0	1	249	0	0	232	62	0
Otu000025	3281	Actinobacteria(100)	Actinobacteria(100)	Actinomycetales(100)	Corynebacteriaceae(100)	Corynebacterium(100)			0	0	0	0	0	0	0	0	8	0	59	6	0	0	0	0	0	72	0	8	0	35	0	0	1	4	660	1398	569	20	5	394	40	0	0	0	0	0	0	2
Otu000026	3215	Actinobacteria(100)	Actinobacteria(100)	Actinomycetales(100)	Propionibacteriaceae(100)	Propionibacterium(100)			50	0	2	37	26	93	38	11	2	1	40	69	7	0	77	35	70	7	158	87	8	686	5	476	57	41	60	1	151	34	6	95	25	19	355	19	135	20	34	99
Otu000027	3208	Proteobacteria(100)	Alphaproteobacteria(100)	Rhizobiales(100)	Rhizobiaceae(100)	Rhizobium(97)			0	0	0	0	0	0	0	0	0	2113	0	6	0	0	167	0	0	0	1	0	12	0	1	716	0	0	7	0	0	68	25	0	7	0	0	85	0	0	0	0
Otu000028	2709	Firmicutes(100)	Clostridia(100)	Clostridiales(100)	Clostridiales_Incertae_Sedis_XI(100)	Anaerococcus(100)			0	0	0	0	0	0	0	0	53	0	0	0	0	0	0	0	104	0	0	0	0	1	0	0	42	0	0	42	5	0	0	17	2257	0	188	0	0	0	0	0
Otu000029	2229	Proteobacteria(100)	Betaproteobacteria(100)	Burkholderiales(100)	Comamonadaceae(100)	Comamonas(99)			0	0	0	0	0	0	0	0	0	0	0	0	0	0	254	0	0	0	0	0	0	0	0	0	0	0	0	0	0	0	0	0	0	0	0	1972	1	1	1	0
Otu000030	2148	Proteobacteria(100)	Gammaproteobacteria(100)	Xanthomonadales(100)	Xanthomonadaceae(100)	Stenotrophomonas(100)			0	0	0	0	0	0	0	0	0	1014	0	0	0	0	1105	0	0	2	1	0	0	0	0	0	0	0	0	0	0	0	0	16	0	0	0	8	0	0	2	0
Otu000031	2105	unclassified(100)	unclassified(100)	unclassified(100)	unclassified(100)	unclassified(100)			104	38	39	0	212	510	0	16	1	1	0	43	0	110	1	51	0	11	13	5	0	59	34	8	1	0	12	2	0	0	4	0	0	0	3	14	1	75	0	68
Otu000032	2023	Proteobacteria(100)	Alphaproteobacteria(100)	Rhodospirillales(100)	Reyranella(100)	unclassified(100)			338	223	29	67	329	0	0	0	0	0	18	16	11	46	0	1	162	16	1	0	0	5	18	24	17	0	6	13	10	25	80	34	41	22	41	4	0	159	0	20
Otu000033	1952	Firmicutes(100)	Bacilli(100)	Lactobacillales(100)	Lactobacillaceae(100)	Lactobacillus(100)			0	0	0	0	0	0	0	0	0	0	0	0	0	0	0	0	0	0	57	0	0	0	0	0	0	0	0	13	0	0	0	206	1676	0	0	0	0	0	0	0
Otu000034	1823	Firmicutes(100)	Bacilli(100)	Lactobacillales(100)	Lactobacillaceae(100)	Lactobacillus(100)			481	0	0	0	0	0	0	0	0	0	63	0	0	0	0	0	0	0	0	177	0	0	15	0	125	1	0	132	221	0	54	144	269	0	0	0	0	107	34	0
Otu000035	1790	Firmicutes(100)	Bacilli(100)	Lactobacillales(100)	Lactobacillaceae(100)	Lactobacillus(100)			0	0	0	0	0	0	0	0	0	0	0	0	0	0	0	0	0	0	0	0	0	0	0	0	0	0	0	0	0	0	0	0	0	0	1787	0	0	0	0	3
Otu000036	1758	Proteobacteria(100)	Betaproteobacteria(100)	Neisseriales(100)	Neisseriaceae(100)	Neisseria(99)			0	0	0	0	0	0	0	0	0	0	0	0	0	0	0	0	0	2	0	0	0	81	1	0	412	3	11	0	0	14	0	0	0	8	312	0	0	0	914	0
Otu000037	1749	Proteobacteria(100)	Betaproteobacteria(100)	Burkholderiales(100)	Burkholderiaceae(100)	Ralstonia(100)			94	7	0	175	178	316	146	37	0	0	0	1	27	0	0	10	2	20	0	16	1	2	9	7	5	0	0	13	0	64	0	38	80	16	25	6	0	34	44	61
Otu000038	1734	Proteobacteria(100)	Gammaproteobacteria(100)	Pasteurellales(100)	Pasteurellaceae(100)	Haemophilus(100)			0	0	0	0	0	0	0	0	0	0	0	2	7	0	0	0	40	0	0	0	0	19	0	0	335	28	5	0	0	123	12	0	0	1	48	1	0	0	1113	0
Otu000039	1730	Actinobacteria(100)	Actinobacteria(100)	Actinomycetales(100)	Micrococcaceae(100)	Rothia(100)			0	0	0	0	0	0	0	0	0	0	0	0	0	0	0	8	0	0	0	0	0	8	0	0	36	10	4	5	0	0	0	0	0	2	1617	1	0	0	0	38
Otu000040	1698	Actinobacteria(100)	Actinobacteria(100)	Actinomycetales(100)	Actinomycetaceae(100)	Actinomyces(100)			0	0	0	0	0	0	0	0	0	3	0	0	0	0	0	4	0	0	0	0	0	29	0	0	33	0	2	0	84	0	0	0	0	1	795	100	0	0	647	0
Otu000041	1643	Bacteroidetes(100)	Flavobacteriia(100)	Flavobacteriales(100)	Flavobacteriaceae(100)	Chryseobacterium(100)			0	0	0	0	0	0	0	0	0	1444	0	0	0	0	63	0	0	0	0	0	0	0	0	0	0	0	0	0	0	0	0	0	0	0	136	0	0	0	0	0
Otu000042	1503	Proteobacteria(100)	Gammaproteobacteria(100)	Pseudomonadales(100)	Pseudomonadaceae(100)	Pseudomonas(98)			3	0	110	0	0	0	0	0	0	0	0	2	0	0	767	0	0	17	0	0	0	34	0	0	12	33	0	0	0	1	0	0	64	0	0	26	0	0	0	13
Otu000043	1485	Proteobacteria(100)	Alphaproteobacteria(100)	Rhodobacterales(100)	Rhodobacteraceae(100)	Paracoccus(99)			0	0	0	74	139	3	0	0	1	0	0	10	23	0	1	48	175	4	3	0	0	33	7	0	5	23	3	69	0	0	3	7	7	2	50	295	0	0	0	80
Otu000044	1440	Firmicutes(100)	Bacilli(100)	Lactobacillales(100)	Carnobacteriaceae(100)	Granulicatella(100)			0	0	0	0	0	0	0	0	0	0	0	7	0	0	0	0	0	0	0	0	0	20	0	0	342	16	2	8	0	4	0	0	0	0	1024	10	0	0	0	0
Otu000045	1368	Proteobacteria(100)	Alphaproteobacteria(100)	Caulobacterales(100)	Caulobacteraceae(100)	Brevundimonas(100)			0	0	0	0	0	0	0	0	0	0	0	5	0	0	977	0	11	0	0	0	0	0	0	358	0	0	0	0	0	0	0	0	0	1	14	2	0	0	0	0
Otu000046	1354	Proteobacteria(100)	Betaproteobacteria(100)	Burkholderiales(100)	Oxalobacteraceae(100)	Herbaspirillum(100)			258	129	2	1	0	66	0	16	1	0	0	0	66	21	0	10	81	22	0	23	1	13	16	14	0	1	1	4	5	14	39	57	41	8	50	3	60	73	60	67
Otu000047	1278	Actinobacteria(100)	Actinobacteria(100)	Bifidobacteriales(100)	Bifidobacteriaceae(100)	Bifidobacterium(100)			0	0	0	0	0	0	0	0	0	0	0	0	0	0	0	0	0	0	0	0	0	0	0	0	49	0	0	0	0	0	0	0	938	1	0	0	0	0	0	9
Otu000048	1205	Proteobacteria(100)	Gammaproteobacteria(100)	Aeromonadales(100)	Aeromonadaceae(100)	Aeromonas(100)			229	0	0	0	0	0	0	0	0	0	0	0	0	0	373	0	0	45	2	0	0	60	0	0	0	0	6	38	0	0	0	0	0	0	0	452	0	0	0	0
Otu000049	1089	Proteobacteria(100)	Alphaproteobacteria(100)	Sphingomonadales(100)	Sphingomonadaceae(100)	Sphingobium(100)			0	0	0	0	0	0	0	0	0	1	0	0	0	0	885	0	0	0	0	0	0	0	0	0	0	0	0	0	0	0	0	0	0	0	203	0	0	0	0	0
Otu000050	1025	Firmicutes(100)	Clostridia(100)	Clostridiales(100)	Clostridiales_Incertae_Sedis_XI(100)	Finegoldia(100)			0	0	0	0	71	0	0	0	0	0	0	0	0	0	0	23	0	0	0	0	0	52	12	0	13	0	0	0	0	0	124	225	0	0	505	0	0	0	0	0
Otu000051	944	Actinobacteria(100)	Actinobacteria(100)	Actinomycetales(100)	Actinomycetaceae(100)	Actinomyces(100)			0	0	0	0	0	0	0	0	0	0	0	0	0	0	0	0	0	0	0	0	0	0	537	0	0	0	0	0	0	0	0	0	0	0	407	0	0	0	0	0
Otu000052	921	Actinobacteria(100)	Actinobacteria(100)	Bifidobacteriales(100)	Bifidobacteriaceae(100)	Bifidobacterium(100)			0	0	0	0	0	0	0	0	0	0	0	0	0	0	0	0	0	0	0	0	0	0	0	0	0	0	0	0	0	0	0	0	897	21	0	3	0	0	0	0
Otu000053	882	Firmicutes(100)	Negativicutes(100)	Selenomonadales(100)	Veillonellaceae(100)	Veillonella(100)			0	0	0	0	0	0	0	0	0	24	0	311	0	0	471	0	0	0	0	0	0	0	0	0	0	0	0	0	0	0	0	0	76	0	0	0	0	0	0	0
Otu000054	880	Actinobacteria(100)	Actinobacteria(100)	Actinomycetales(100)	Micrococcaceae(100)	Micrococcus(98)			29	0	0	0	83	0	0	0	3	0	0	58	0	0	0	7	54	28	0	0	0	19	0	63	0	177	0	0	0	2	83	10	25	81	135	3	1	0	17	2
Otu000055	864	Actinobacteria(100)	Actinobacteria(100)	Actinomycetales(100)	Corynebacteriaceae(99)	Corynebacterium(98)			0	0	0	0	0	0	0	0	20	0	0	0	0	0	0	0	0	0	61	0	0	0	0	329	1	1	83	23	0	0	0	0	85	0	261	0	0	0	0	0
Otu000056	809	Actinobacteria(100)	Actinobacteria(100)	Actinomycetales(100)	Micrococcaceae(100)	Rothia(100)			0	0	0	0	0	0	0	0	0	0	0	21	0	0	0	0	306	0	0	0	0	4	0	0	81	294	45	0	0	0	0	0	58	0	0	0	0	0	0	0
Otu000057	768	Firmicutes(100)	Bacilli(100)	Bacillales(100)	Bacillaceae_1(71)	Bacillus(71)			0	0	0	0	66	0	108	7	1	0	8	0	0	0	0	0	0	0	0	21	0	5	4	0	7	0	2	0	0	0	0	34	0	0	3	0	37	6	0	28
Otu000058	749	Proteobacteria(100)	Gammaproteobacteria(100)	Enterobacteriales(100)	Enterobacteriaceae(100)	Escherichia/Shigella(100)			0	0	0	0	0	0	0	0	0	0	0	0	0	0	0	0	0	0	19	8	449	91	25	11	0	0	1	0	20	1	52	0	0	0	37	0	0	0	0	0
Otu000059	739	Firmicutes(100)	Bacilli(100)	Lactobacillales(100)	Streptococcaceae(100)	Streptococcus(100)			0	0	0	0	0	0	0	0	0	0	0	0	0	0	0	5	0	0	0	0	0	0	2	0	30	0	0	0	0	0	0	0	0	0	306	0	0	0	395	0
Otu000060	714	Firmicutes(100)	Clostridia(100)	Clostridiales(100)	Clostridiales_Incertae_Sedis_XI(100)	Anaerococcus(100)			0	0	0	0	0	0	0	0	0	0	0	0	0	0	0	10	0	0	0	0	0	194	0	0	17	0	0	0	0	24	169	115	0	0	185	0	0	0	0	0
Otu000061	674	Firmicutes(100)	Bacilli(100)	Lactobacillales(100)	Enterococcaceae(100)	Enterococcus(98)			0	0	0	0	0	0	0	0	1	0	0	0	0	0	0	0	0	0	0	0	0	0	8	0	0	0	0	0	1	1	74	0	0	0	137	0	0	0	0	0
Otu000062	651	Actinobacteria(100)	Actinobacteria(100)	Bifidobacteriales(100)	Bifidobacteriaceae(100)	Bifidobacterium(100)			0	0	0	0	0	0	0	0	0	0	0	0	0	0	172	0	0	36	0	82	0	0	0	0	0	0	0	0	0	0	0	0	16	0	93	0	0	0	0	252
Otu000063	640	Proteobacteria(100)	Alphaproteobacteria(100)	Rhizobiales(100)	Methylobacteriaceae(100)	Methylobacterium(100)			0	0	0	11	0	0	0	0	0	0	0	0	0	1	0	3	518	0	0	0	0	0	2	0	0	0	3	2	0	0	8	0	0	0	0	0	0	0	0	0
Otu000064	638	Proteobacteria(100)	Alphaproteobacteria(100)	Sphingomonadales(100)	Erythrobacteraceae(100)	unclassified(95)			0	0	0	21	0	259	115	9	0	0	0	0	0	0	0	12	0	0	0	5	0	0	0	13	6	0	0	10	0	18	0	0	0	0	0	0	2	0	0	36
Otu000065	632	Firmicutes(100)	Clostridia(100)	Clostridiales(100)	Peptoniphilaceae(100)	Peptoniphilus(100)			0	0	0	0	0	0	0	0	2	0	0	3	0	0	0	18	0	0	0	0	1	62	0	35	43	0	0	19	0	16	78	0	0	0	348	7	0	0	0	0
Otu000066	620	Proteobacteria(100)	Betaproteobacteria(100)	Burkholderiales(100)	Comamonadaceae(100)	Delftia(100)			101	0	0	0	0	111	0	9	0	193	17	2	8	0	1	1	0	0	0	0	0	0	14	4	1	1	0	0	0	0	0	8	0	0	52	4	0	93	0	0
Otu000067	618	Candidatus_Saccharibacteria(100)	unclassified(100)	unclassified(100)	unclassified(100)	unclassified(100)			0	0	0	0	0	0	0	0	0	0	0	0	0	0	0	0	0	0	0	0	0	39	0	5	316	0	0	0	0	0	0	0	0	0	258	0	0	0	0	0
Otu000068	618	Bacteroidetes(100)	Sphingobacteriia(100)	Sphingobacteriales(100)	Sphingobacteriaceae(100)	Sphingobacterium(100)			0	0	0	0	0	0	0	0	0	618	0	0	0	0	0	0	0	0	0	0	0	0	0	0	0	0	0	0	0	0	0	0	0	0	0	0	0	0	0	0
Otu000069	610	Bacteroidetes(100)	Flavobacteriia(100)	Flavobacteriales(100)	Flavobacteriaceae(100)	Cloacibacterium(100)			0	0	0	0	11	0	547	0	0	0	20	0	0	0	0	2	0	0	0	0	0	0	0	0	0	25	0	0	0	0	0	0	0	0	0	0	0	5	0	0
Otu000070	608	Actinobacteria(100)	Actinobacteria(100)	Bifidobacteriales(100)	Bifidobacteriaceae(100)	Bifidobacterium(100)			0	0	0	0	0	0	0	0	0	0	0	442	0	0	137	0	0	0	10	0	0	0	0	0	0	0	0	19	0	0	0	0	0	0	0	0	0	0	0	0
Otu000071	548	Firmicutes(100)	Negativicutes(100)	Selenomonadales(100)	Veillonellaceae(100)	Veillonella(99)			0	0	0	0	0	0	0	0	0	0	0	0	0	15	0	0	44	35	0	0	0	256	0	14	127	0	0	0	0	0	0	0	57	0	0	0	0	0	0	0
Otu000072	543	Actinobacteria(100)	Actinobacteria(100)	Actinomycetales(100)	Corynebacteriaceae(100)	Corynebacterium(100)			1	0	0	0	0	0	0	0	0	0	0	0	0	0	0	0	0	0	0	0	0	0	0	0	0	0	0	0	0	0	0	0	540	2	0	0	0	0	0	0
Otu000073	501	Bacteroidetes(100)	Bacteroidia(100)	Bacteroidales(100)	Bacteroidaceae(100)	Bacteroides(100)			0	0	0	0	0	0	0	0	0	0	0	0	0	0	0	0	0	0	0	0	0	0	0	0	0	0	0	0	0	0	0	29	68	0	2	0	0	0	0	103
Otu000074	483	Firmicutes(100)	Clostridia(100)	Clostridiales(100)	Ruminococcaceae(100)	Faecalibacterium(100)			0	0	0	0	161	0	0	0	0	0	0	0	0	0	0	0	225	0	0	0	0	0	0	0	5	26	0	0	0	0	0	0	0	0	51	0	0	0	0	15
Otu000075	482	Actinobacteria(100)	Actinobacteria(100)	Actinomycetales(100)	Actinomycetaceae(100)	Actinomyces(100)			0	0	0	0	0	0	0	0	0	0	0	0	0	0	0	12	3	0	2	0	0	6	0	0	88	0	15	0	0	4	0	0	0	0	332	5	0	15	0	0
Otu000076	442	Firmicutes(100)	Clostridia(100)	Clostridiales(100)	Clostridiales_Incertae_Sedis_XI(100)	Anaerococcus(100)			0	0	0	0	0	192	0	0	2	0	0	0	0	0	1	0	86	0	0	0	0	0	0	0	35	0	2	0	0	0	0	0	0	0	62	2	0	0	0	0
Otu000077	432	Proteobacteria(100)	Betaproteobacteria(100)	Burkholderiales(100)	Burkholderiaceae(100)	Lautropia(100)			0	0	0	0	0	0	0	0	0	0	0	0	0	0	0	0	0	0	0	0	0	17	0	0	1	0	2	0	0	0	0	0	0	0	405	6	0	0	0	0
Otu000078	411	Bacteroidetes(100)	Flavobacteriia(100)	Flavobacteriales(100)	Flavobacteriaceae(100)	Chishuiella(100)			0	0	0	0	0	0	0	0	0	0	0	0	0	1	408	1	1	0	0	0	0	0	0	0	0	0	0	0	0	0	0	0	0	0	0	0	0	0	0	0
Otu000079	410	Proteobacteria(100)	Betaproteobacteria(100)	Neisseriales(100)	Neisseriaceae(100)	unclassified(100)			0	0	0	0	0	0	0	0	0	0	0	28	0	0	0	0	0	0	0	0	0	303	0	0	0	0	0	71	0	0	0	0	0	0	8	0	0	0	0	0
Otu000080	390	Proteobacteria(100)	Betaproteobacteria(100)	Neisseriales(100)	Neisseriaceae(100)	Neisseria(100)			0	0	0	0	0	0	0	0	0	0	0	0	0	0	0	0	0	0	0	0	0	12	0	0	17	0	0	0	0	0	0	0	0	0	361	0	0	0	0	0
Otu000081	386	Firmicutes(100)	Clostridia(100)	Clostridiales(100)	Clostridiaceae_1(100)	Clostridium_sensu_stricto(100)			0	0	0	0	0	0	0	0	0	0	0	0	0	0	0	0	0	0	0	0	0	0	0	0	0	16	0	0	0	0	0	0	0	0	0	0	0	0	0	0
Otu000082	381	Actinobacteria(100)	Actinobacteria(100)	Actinomycetales(100)	Actinomycetaceae(100)	Actinomyces(100)			0	0	0	0	0	0	0	0	0	1	0	0	0	0	0	0	0	8	52	0	0	17	0	0	0	0	0	0	125	0	0	0	23	0	155	0	0	0	0	0
Otu000083	371	Actinobacteria(100)	Actinobacteria(100)	Actinomycetales(100)	Corynebacteriaceae(100)	Corynebacterium(100)			0	0	0	0	0	0	0	0	0	0	0	0	0	0	0	0	43	0	7	0	0	0	0	0	0	0	0	0	0	0	0	67	219	0	35	0	0	0	0	0
Otu000084	365	Firmicutes(100)	Clostridia(100)	Clostridiales(100)	Ruminococcaceae(100)	Oscillibacter(100)			364	0	0	0	0	0	0	0	0	0	0	0	0	0	0	0	0	0	0	0	0	0	0	0	0	0	0	0	0	0	0	0	0	0	0	0	0	0	0	1
Otu000085	364	Actinobacteria(100)	Actinobacteria(100)	Actinomycetales(100)	Corynebacteriaceae(100)	Corynebacterium(100)			0	0	0	0	0	0	0	0	29	0	0	0	0	0	0	0	218	0	0	0	0	0	0	0	0	0	2	2	0	0	0	45	68	0	0	0	0	0	0	0
Otu000086	359	Firmicutes(100)	Bacilli(100)	Lactobacillales(100)	Streptococcaceae(100)	Streptococcus(100)			0	0	0	0	0	0	0	0	0	0	0	0	0	0	0	0	0	0	0	0	0	0	0	0	4	0	0	0	0	0	0	0	0	0	355	0	0	0	0	0
Otu000087	355	Firmicutes(100)	Clostridia(100)	Clostridiales(100)	Clostridiales_Incertae_Sedis_XI(100)	Anaerococcus(100)			0	0	0	0	0	0	0	0	0	0	0	0	0	0	0	0	0	0	0	0	0	151	0	0	5	0	0	0	0	0	47	58	0	0	94	0	0	0	0	0
Otu000088	335	Proteobacteria(100)	Alphaproteobacteria(100)	Sphingomonadales(100)	Sphingomonadaceae(100)	Sphingobium(98)			0	0	0	0	0	0	0	0	0	1	0	20	0	0	266	0	0	0	0	0	0	0	0	0	0	0	0	0	0	0	0	0	0	0	0	3	45	0	0	0
Otu000089	334	Proteobacteria(100)	Gammaproteobacteria(100)	Pseudomonadales(100)	Moraxellaceae(100)	Acinetobacter(100)			0	73	0	31	0	0	0	0	0	0	0	15	0	0	72	2	0	29	0	0	0	8	0	0	0	0	0	92	0	0	0	0	0	0	0	12	0	0	0	0
Otu000090	333	Firmicutes(100)	Bacilli(100)	Lactobacillales(100)	Lactobacillaceae(100)	Lactobacillus(100)			0	0	0	0	0	0	0	0	0	0	0	0	0	0	0	0	0	0	0	0	0	0	7	0	16	3	0	0	0	15	0	16	0	0	0	0	0	16	7	0
Otu000091	331	Proteobacteria(100)	Alphaproteobacteria(100)	Rhizobiales(100)	Phyllobacteriaceae(100)	Mesorhizobium(98)			0	0	0	0	0	0	0	0	0	0	0	0	0	0	0	0	0	0	3	0	0	1	0	0	0	0	0	14	8	0	0	0	0	0	0	0	0	0	0	0
Otu000092	328	Proteobacteria(100)	Alphaproteobacteria(100)	Caulobacterales(100)	Caulobacteraceae(100)	Brevundimonas(100)			0	0	0	0	0	0	0	0	0	283	0	0	0	0	31	0	0	0	0	0	0	0	0	8	0	0	0	0	3	0	0	0	0	0	0	3	0	0	0	0
Otu000093	324	Proteobacteria(100)	Gammaproteobacteria(100)	Oceanospirillales(100)	Alcanivoracaceae(100)	Alcanivorax(100)			0	55	15	0	0	0	51	7	0	0	0	0	0	0	0	0	67	0	0	0	0	0	0	0	0	0	2	0	2	3	3	0	0	0	3	0	0	19	0	97
Otu000094	320	Proteobacteria(100)	Gammaproteobacteria(100)	Pasteurellales(100)	Pasteurellaceae(100)	Haemophilus(100)			1	0	0	0	0	0	0	0	0	0	0	0	0	0	0	0	115	5	0	0	0	0	0	0	80	8	2	0	0	0	0	28	0	46	33	2	0	0	0	0
Otu000095	307	Actinobacteria(100)	Actinobacteria(100)	Coriobacteriales(100)	Coriobacteriaceae(100)	Gordonibacter(100)			0	0	0	0	0	0	0	0	0	0	0	0	0	0	0	0	0	0	0	0	0	0	0	0	0	0	0	0	0	0	0	0	0	0	0	0	0	0	0	0
Otu000096	307	Firmicutes(100)	Bacilli(100)	Lactobacillales(100)	Lactobacillaceae(100)	Lactobacillus(100)			307	0	0	0	0	0	0	0	0	0	0	0	0	0	0	0	0	0	0	0	0	0	0	0	0	0	0	0	0	0	0	0	0	0	0	0	0	0	0	0
Otu000097	299	Bacteroidetes(100)	Sphingobacteriia(100)	Sphingobacteriales(100)	Sphingobacteriaceae(100)	Sphingobacterium(100)			0	0	0	0	0	0	0	0	0	2	0	1	0	0	251	0	0	0	0	0	23	18	0	0	0	0	3	0	0	0	0	0	0	0	1	0	0	0	0	0
Otu000098	297	Firmicutes(100)	Bacilli(100)	Bacillales(100)	Staphylococcaceae(98)	Staphylococcus(98)			0	0	0	0	0	0	0	0	7	0	0	0	0	0	0	10	0	118	3	3	0	2	90	0	2	3	5	8	16	5	2	10	1	0	4	0	0	0	8	0
Otu000099	294	Bacteroidetes(100)	Flavobacteriia(100)	Flavobacteriales(100)	Flavobacteriaceae(100)	Chryseobacterium(100)			0	0	0	0	0	0	0	0	0	0	0	0	0	0	294	0	0	0	0	0	0	0	0	0	0	0	0	0	0	0	0	0	0	0	0	0	0	0	0	0
Otu000100	288	Proteobacteria(100)	Alphaproteobacteria(100)	Sphingomonadales(100)	Sphingomonadaceae(100)	Sphingomonas(100)			123	0	0	0	0	0	0	0	0	3	0	0	0	0	2	0	83	0	0	12	0	0	0	0	0	0	1	0	4	0	0	0	0	0	24	0	0	0	35	0
Otu000101	286	Bacteroidetes(100)	Flavobacteriia(100)	Flavobacteriales(100)	Flavobacteriaceae(100)	Chryseobacterium(100)			0	0	0	0	0	0	0	0	0	0	0	0	0	0	0	0	0	0	0	0	0	0	0	0	0	0	0	0	0	0	0	0	0	0	286	0	0	0	0	0
Otu000102	280	Actinobacteria(100)	Actinobacteria(100)	Bifidobacteriales(100)	Bifidobacteriaceae(100)	Scardovia(100)			0	0	0	0	0	0	0	0	0	0	0	0	0	0	212	0	0	0	0	0	0	23	0	0	0	0	0	0	0	0	0	0	0	0	0	0	0	0	45	0
Otu000103	273	Bacteroidetes(100)	Flavobacteriia(100)	Flavobacteriales(100)	Flavobacteriaceae(100)	Flavobacterium(100)			0	0	0	0	0	0	0	0	0	0	0	0	0	0	0	0	0	0	0	0	0	0	0	0	0	0	0	0	0	0	0	0	0	0	0	0	0	0	0	0
Otu000104	272	Firmicutes(100)	Negativicutes(100)	Selenomonadales(100)	Veillonellaceae(100)	Dialister(100)			0	0	0	0	0	0	0	0	0	0	0	0	0	0	0	0	0	0	0	0	0	97	1	0	0	0	0	0	0	0	54	0	0	0	120	0	0	0	0	0
Otu000105	263	Actinobacteria(100)	Actinobacteria(100)	Actinomycetales(100)	Microbacteriaceae(100)	Microbacterium(97)			0	0	0	0	0	0	3	0	0	0	0	0	0	0	0	10	0	0	0	0	0	6	0	1	0	0	0	0	1	0	0	0	0	0	71	0	0	10	0	0
Otu000106	261	Firmicutes(100)	Bacilli(100)	Lactobacillales(100)	Lactobacillaceae(99)	Lactobacillus(99)			0	0	0	0	0	0	0	0	0	0	0	0	0	0	0	0	0	0	0	261	0	0	0	0	0	0	0	0	0	0	0	0	0	0	0	0	0	0	0	0
Otu000107	259	Actinobacteria(100)	Actinobacteria(100)	Actinomycetales(100)	Micrococcaceae(100)	Kocuria(100)			0	0	0	0	0	0	0	0	2	0	0	9	0	0	0	5	121	0	0	0	0	3	0	2	7	0	0	0	0	0	0	0	0	8	8	0	0	0	39	0
Otu000108	253	Bacteroidetes(100)	Bacteroidia(100)	Bacteroidales(100)	Prevotellaceae(100)	Prevotella(100)			0	0	0	0	0	0	0	0	0	0	0	0	0	0	0	0	0	0	0	0	0	0	0	0	4	0	0	0	0	0	0	0	0	0	197	0	0	0	52	0
Otu000109	250	Bacteroidetes(100)	Bacteroidia(100)	Bacteroidales(100)	Prevotellaceae(100)	Prevotella(100)			0	0	0	250	0	0	0	0	0	0	0	0	0	0	0	0	0	0	0	0	0	0	0	0	0	0	0	0	0	0	0	0	0	0	0	0	0	0	0	0
Otu000110	217	Firmicutes(100)	Clostridia(100)	Clostridiales(100)	Peptoniphilaceae(100)	Peptoniphilus(100)			0	0	0	0	0	0	0	0	0	0	0	0	0	0	0	5	0	0	0	0	0	75	0	0	5	0	0	0	0	0	75	0	0	0	57	0	0	0	0	0
Otu000111	217	Firmicutes(100)	Bacilli(100)	Lactobacillales(100)	Carnobacteriaceae(100)	Dolosigranulum(100)			0	0	0	0	0	0	0	0	0	0	86	15	0	0	0	0	0	36	0	21	0	2	3	0	0	0	0	0	0	0	0	0	47	0	2	5	0	0	0	0
Otu000112	210	Firmicutes(100)	Bacilli(100)	Bacillales(100)	Bacillaceae_1(96)	Bacillus(96)			0	4	1	0	43	0	78	0	0	0	0	0	0	0	0	0	0	0	0	0	0	3	2	1	6	1	0	1	0	14	0	16	0	0	0	0	29	0	11	0
Otu000113	206	Firmicutes(100)	Bacilli(100)	Lactobacillales(100)	Lactobacillaceae(100)	Lactobacillus(100)			0	0	0	0	0	0	0	0	0	0	0	2	0	0	0	0	0	0	0	0	0	0	0	0	0	0	0	0	0	0	0	0	199	5	0	0	0	0	0	0
Otu000114	204	Firmicutes(100)	Bacilli(100)	Lactobacillales(100)	Aerococcaceae(100)	Abiotrophia(100)			0	0	0	0	0	0	0	0	0	0	0	9	0	0	0	14	0	0	0	0	0	5	0	9	88	3	0	0	0	0	0	0	0	0	76	0	0	0	0	0
Otu000115	202	Firmicutes(100)	Bacilli(100)	Lactobacillales(100)	Streptococcaceae(100)	Lactococcus(100)			0	0	0	0	0	0	0	0	0	1	0	195	0	0	0	0	0	0	0	0	0	0	0	0	0	0	0	0	0	6	0	0	0	0	0	0	0	0	0	0
Otu000116	200	Proteobacteria(100)	Alphaproteobacteria(100)	Sphingomonadales(100)	Sphingomonadaceae(100)	Sphingomonas(99)			0	0	0	0	0	0	0	0	0	0	0	0	0	0	0	0	0	0	0	0	0	0	0	0	0	0	0	0	0	0	0	0	0	0	0	0	0	0	0	0
Otu000117	197	Bacteroidetes(100)	Bacteroidia(100)	Bacteroidales(100)	Bacteroidaceae(100)	Bacteroides(100)			172	0	0	0	0	0	0	0	0	0	0	0	0	0	0	0	0	0	0	0	0	0	0	0	0	0	0	0	0	0	0	0	25	0	0	0	0	0	0	0
Otu000118	196	Actinobacteria(100)	Actinobacteria(100)	Coriobacteriales(100)	Coriobacteriaceae(100)	Atopobium(100)			0	0	0	0	0	0	0	0	0	6	0	0	0	0	0	0	30	19	0	0	0	0	0	0	0	0	0	0	0	0	64	12	0	0	65	0	0	0	0	0
Otu000119	195	Proteobacteria(100)	Gammaproteobacteria(100)	Pseudomonadales(100)	Pseudomonadaceae(100)	Pseudomonas(100)			0	139	0	0	0	0	0	0	0	0	0	0	0	0	10	0	0	0	0	0	0	0	0	0	0	0	0	0	0	8	0	0	0	2	0	12	0	24	0	0
Otu000120	195	Bacteroidetes(100)	Flavobacteriia(100)	Flavobacteriales(100)	Flavobacteriaceae(100)	unclassified(100)			0	0	0	0	0	0	0	0	3	0	0	17	0	0	0	0	0	2	13	0	0	33	0	0	26	0	0	0	76	0	8	0	0	0	8	9	0	0	0	0
Otu000121	188	Firmicutes(100)	Bacilli(100)	Lactobacillales(100)	Streptococcaceae(100)	Streptococcus(100)			0	0	0	0	0	0	0	0	24	0	13	9	0	0	12	0	0	5	1	0	0	1	0	7	0	1	3	0	9	22	0	3	1	0	45	0	0	0	0	32
Otu000122	186	Firmicutes(100)	Bacilli(100)	Lactobacillales(100)	Streptococcaceae(100)	Lactococcus(100)			0	0	18	0	0	0	0	0	0	0	8	145	0	0	0	0	0	0	0	0	0	0	0	0	0	0	5	0	1	0	0	0	0	0	0	0	0	0	9	0
Otu000123	186	Proteobacteria(100)	Betaproteobacteria(100)	Burkholderiales(100)	Burkholderiales_incertae_sedis(100)	Aquabacterium(100)			0	0	0	0	0	0	0	0	0	0	0	0	0	0	0	0	0	0	0	11	0	0	0	0	0	0	0	0	0	10	0	0	0	0	0	0	0	0	0	0
Otu000124	182	Proteobacteria(100)	Gammaproteobacteria(100)	Vibrionales(100)	Vibrionaceae(100)	Photobacterium(100)			0	0	0	0	0	0	0	0	0	0	0	0	0	0	0	0	0	0	112	0	0	0	0	0	0	0	0	0	0	0	0	0	0	0	70	0	0	0	0	0
Otu000125	174	Firmicutes(100)	Bacilli(100)	Bacillales(100)	Staphylococcaceae(99)	Staphylococcus(99)			0	0	0	0	0	0	0	0	0	0	0	0	0	0	2	0	0	0	0	0	164	0	0	0	0	0	0	0	0	0	0	0	0	0	1	7	0	0	0	0
Otu000126	172	Proteobacteria(100)	Gammaproteobacteria(100)	Xanthomonadales(100)	Xanthomonadaceae(100)	Xanthomonas(99)			0	0	0	0	0	0	0	0	0	0	0	0	0	0	0	0	0	0	0	0	0	0	0	0	0	0	0	0	0	0	0	0	0	0	172	0	0	0	0	0
Otu000127	171	Proteobacteria(100)	Alphaproteobacteria(100)	Rhizobiales(100)	Bradyrhizobiaceae(100)	Bradyrhizobium(79)			0	0	0	0	34	0	0	0	0	0	0	2	0	0	0	0	0	0	0	6	0	0	0	0	0	6	0	0	0	0	0	0	2	0	1	0	0	0	11	0
Otu000128	168	Proteobacteria(100)	Gammaproteobacteria(100)	Oceanospirillales(100)	Halomonadaceae(100)	Halomonas(97)			0	0	0	0	0	0	0	0	0	0	0	0	0	6	0	0	40	0	0	0	0	0	0	0	0	7	0	6	0	0	0	0	0	0	0	0	0	0	1	0
Otu000129	165	Firmicutes(100)	Bacilli(100)	Lactobacillales(100)	Carnobacteriaceae(100)	Atopostipes(100)			16	0	0	0	104	0	0	0	0	0	0	0	0	0	0	8	0	0	0	0	2	0	0	0	0	0	0	11	0	13	0	0	10	0	1	0	0	0	0	0
Otu000130	163	unclassified(100)	unclassified(100)	unclassified(100)	unclassified(100)	unclassified(100)			8	3	5	0	14	39	0	0	0	0	0	1	0	12	0	5	0	0	1	1	0	4	5	0	0	0	3	0	0	0	0	0	0	0	1	1	0	5	0	3
Otu000131	163	Firmicutes(100)	Bacilli(100)	Lactobacillales(100)	Carnobacteriaceae(100)	Granulicatella(100)			0	0	0	0	0	0	0	0	1	0	0	0	0	0	0	0	0	0	3	0	0	11	0	0	147	0	1	0	0	0	0	0	0	0	0	0	0	0	0	0
Otu000132	162	Bacteroidetes(100)	Bacteroidia(100)	Bacteroidales(100)	Prevotellaceae(100)	Prevotella(100)			0	0	0	0	0	0	0	0	0	0	0	0	0	0	0	0	0	0	0	0	0	59	0	0	0	0	0	0	0	0	103	0	0	0	0	0	0	0	0	0
Otu000133	161	Actinobacteria(100)	Actinobacteria(100)	Actinomycetales(100)	Intrasporangiaceae(100)	Janibacter(94)			0	0	0	0	0	0	0	0	0	0	0	3	0	0	0	0	154	0	0	0	0	0	0	0	0	0	2	0	2	0	0	0	0	0	0	0	0	0	0	0
Otu000134	161	Firmicutes(100)	Negativicutes(100)	Selenomonadales(100)	Veillonellaceae(100)	Megasphaera(100)			0	0	0	155	0	0	0	0	0	0	0	0	0	0	0	0	0	0	0	0	0	0	0	0	0	0	0	0	0	0	0	0	0	0	6	0	0	0	0	0
Otu000135	158	Firmicutes(100)	Clostridia(100)	Clostridiales(100)	Lachnospiraceae(100)	Ruminococcus2(100)			0	0	0	0	0	0	0	0	0	0	0	0	0	0	0	0	0	0	0	0	0	0	0	0	0	0	0	0	0	0	0	73	0	0	85	0	0	0	0	0
Otu000136	158	Actinobacteria(100)	Actinobacteria(100)	Actinomycetales(100)	Nocardiaceae(100)	Rhodococcus(100)			0	0	0	0	0	0	0	0	0	0	54	0	0	96	0	0	0	0	0	0	0	0	0	0	0	0	0	0	8	0	0	0	0	0	0	0	0	0	0	0
Otu000137	148	Bacteroidetes(100)	Bacteroidia(100)	Bacteroidales(100)	Prevotellaceae(100)	Alloprevotella(100)			0	0	0	0	0	0	0	0	0	0	0	0	0	0	0	0	101	11	0	0	0	7	0	0	0	0	0	0	0	29	0	0	0	0	0	0	0	0	0	0
Otu000138	143	Proteobacteria(100)	Alphaproteobacteria(100)	Rhizobiales(100)	Methylobacteriaceae(100)	Methylobacterium(100)			0	0	0	0	139	0	0	0	0	0	0	0	0	0	0	0	0	0	0	0	0	0	0	0	1	0	0	0	3	0	0	0	0	0	0	0	0	0	0	0
Otu000139	136	unclassified(100)	unclassified(100)	unclassified(100)	unclassified(100)	unclassified(100)			0	0	0	3	13	0	5	1	0	0	0	0	0	0	0	0	0	2	0	1	0	0	2	4	0	16	0	4	1	0	0	0	0	2	2	0	5	6	0	0
Otu000140	133	Actinobacteria(100)	Actinobacteria(100)	Actinomycetales(100)	Propionibacteriaceae(100)	Propionibacterium(100)			0	0	0	0	0	0	0	0	0	0	0	7	0	0	0	2	0	0	4	0	0	5	0	61	0	0	0	0	0	3	0	0	25	10	16	0	0	0	0	0
Otu000141	125	Firmicutes(100)	Bacilli(100)	Lactobacillales(100)	Leuconostocaceae(100)	Leuconostoc(100)			0	56	0	0	0	0	0	0	0	0	0	1	0	0	0	0	28	0	0	0	0	4	0	0	0	0	0	0	0	0	0	0	0	0	36	0	0	0	0	0
Otu000142	122	Proteobacteria(100)	Gammaproteobacteria(100)	Pseudomonadales(100)	Pseudomonadaceae(100)	Pseudomonas(90)			0	0	0	0	0	0	0	0	0	119	0	0	0	0	0	3	0	0	0	0	0	0	0	0	0	0	0	0	0	0	0	0	0	0	0	0	0	0	0	0
Otu000143	120	Actinobacteria(100)	Actinobacteria(100)	Actinomycetales(100)	Dermacoccaceae(100)	Dermacoccus(100)			0	0	0	0	0	0	0	0	0	0	0	0	0	0	0	0	110	0	0	0	0	10	0	0	0	0	0	0	0	0	0	0	0	0	0	0	0	0	0	0
Otu000144	117	Firmicutes(100)	Clostridia(100)	Clostridiales(100)	Ruminococcaceae(99)	Ruminococcus(99)			0	0	0	0	0	0	0	0	0	0	0	0	0	0	0	0	0	0	0	0	0	0	0	0	0	0	0	0	0	0	0	0	117	0	0	0	0	0	0	0
Otu000145	116	Firmicutes(100)	Erysipelotrichia(100)	Erysipelotrichales(100)	Erysipelotrichaceae(100)	Clostridium_XVIII(97)			0	0	0	0	0	116	0	0	0	0	0	0	0	0	0	0	0	0	0	0	0	0	0	0	0	0	0	0	0	0	0	0	0	0	0	0	0	0	0	0
Otu000146	114	Actinobacteria(100)	Actinobacteria(100)	Actinomycetales(100)	Dermabacteraceae(100)	Dermabacter(100)			0	0	0	0	0	0	0	0	2	0	0	0	0	0	0	0	0	0	0	0	0	0	0	0	0	0	0	0	0	0	0	89	23	0	0	0	0	0	0	0
Otu000147	114	Actinobacteria(100)	Actinobacteria(100)	Bifidobacteriales(100)	Bifidobacteriaceae(100)	Bifidobacterium(100)			0	0	0	0	0	0	0	0	0	0	0	0	0	0	0	0	0	0	0	0	0	0	0	0	6	0	0	0	0	0	0	0	0	107	0	0	0	0	0	1
Otu000148	114	Proteobacteria(100)	Betaproteobacteria(100)	Burkholderiales(100)	Comamonadaceae(100)	Acidovorax(98)			0	0	0	0	0	0	0	0	0	0	0	14	0	0	0	0	0	0	0	0	0	0	7	0	0	0	0	71	0	0	0	0	0	0	0	22	0	0	0	0
Otu000149	113	Proteobacteria(100)	Alphaproteobacteria(100)	Rhizobiales(100)	Methylocystaceae(100)	Methylopila(100)			0	0	0	0	0	0	0	0	0	0	0	0	0	0	0	0	113	0	0	0	0	0	0	0	0	0	0	0	0	0	0	0	0	0	0	0	0	0	0	0
Otu000150	109	Proteobacteria(100)	Betaproteobacteria(100)	Rhodocyclales(100)	Rhodocyclaceae(100)	Dechloromonas(100)			0	0	0	0	67	0	0	0	0	0	0	0	0	0	0	0	0	0	0	0	0	0	0	0	0	0	0	0	0	0	1	41	0	0	0	0	0	0	0	0
Otu000151	109	Verrucomicrobia(100)	Verrucomicrobiae(100)	Verrucomicrobiales(100)	Verrucomicrobiaceae(100)	Akkermansia(100)			0	0	0	0	0	0	0	0	0	0	0	0	0	0	0	0	0	0	0	0	0	0	0	0	0	0	0	0	0	0	0	0	36	0	73	0	0	0	0	0
Otu000152	107	Proteobacteria(100)	Betaproteobacteria(100)	Burkholderiales(100)	Burkholderiales_incertae_sedis(100)	Tepidimonas(100)			0	0	0	79	0	0	0	0	0	0	0	0	0	0	0	0	0	0	0	0	0	0	0	0	0	0	0	0	0	0	0	0	0	0	0	0	0	28	0	0
Otu000153	105	Proteobacteria(100)	Betaproteobacteria(100)	Burkholderiales(100)	Comamonadaceae(100)	Pelomonas(100)			0	0	0	0	0	0	0	0	0	0	0	0	0	5	0	0	0	0	0	21	0	0	0	0	0	0	0	0	0	0	0	0	0	0	0	0	0	0	0	0
Otu000154	105	Firmicutes(100)	Clostridia(100)	Clostridiales(100)	Peptoniphilaceae(100)	unclassified(100)			0	0	0	0	0	0	0	0	0	0	0	0	0	0	0	0	0	0	0	0	0	0	0	0	0	0	0	0	0	0	2	0	0	0	103	0	0	0	0	0
Otu000155	104	Actinobacteria(100)	Actinobacteria(100)	Bifidobacteriales(100)	Bifidobacteriaceae(100)	Gardnerella(100)			0	0	0	0	0	0	0	0	0	0	0	0	0	0	0	2	0	0	0	0	0	0	0	0	0	0	0	0	0	0	0	0	0	0	0	0	0	0	0	102
Otu000156	102	Actinobacteria(100)	Actinobacteria(100)	Actinomycetales(100)	Corynebacteriaceae(100)	Corynebacterium(100)			0	0	0	0	0	0	0	0	0	0	0	33	0	0	0	0	0	58	0	0	0	0	0	1	0	0	2	0	0	0	0	0	0	0	8	0	0	0	0	0
Otu000157	102	Candidatus_Saccharibacteria(100)	unclassified(100)	unclassified(100)	unclassified(100)	unclassified(100)			79	0	0	0	0	0	0	0	0	0	0	0	0	0	0	0	0	0	0	0	0	0	0	0	0	0	0	0	0	0	0	0	23	0	0	0	0	0	0	0
Otu000158	101	Firmicutes(100)	Erysipelotrichia(100)	Erysipelotrichales(100)	Erysipelotrichaceae(100)	Solobacterium(100)			0	0	0	0	0	0	0	0	0	0	0	0	0	0	0	0	0	0	0	0	0	0	0	0	0	0	0	0	0	0	0	0	0	0	101	0	0	0	0	0
Otu000159	100	Fusobacteria(100)	Fusobacteriia(100)	Fusobacteriales(100)	Fusobacteriaceae(100)	Fusobacterium(100)			0	0	0	0	0	0	0	0	0	0	0	0	0	0	0	0	34	0	0	0	0	0	0	0	23	25	3	0	0	0	0	0	1	0	14	0	0	0	0	0
Otu000160	99	Firmicutes(100)	Bacilli(100)	Lactobacillales(100)	Lactobacillaceae(100)	Lactobacillus(100)			0	0	0	0	0	0	0	0	0	0	0	0	0	0	0	0	0	0	0	0	0	0	0	0	0	0	0	99	0	0	0	0	0	0	0	0	0	0	0	0
Otu000161	98	Bacteroidetes(100)	Flavobacteriia(100)	Flavobacteriales(100)	Flavobacteriaceae(100)	Flavobacterium(100)			0	0	0	0	0	0	0	0	0	98	0	0	0	0	0	0	0	0	0	0	0	0	0	0	0	0	0	0	0	0	0	0	0	0	0	0	0	0	0	0
Otu000162	96	Firmicutes(100)	Bacilli(100)	Bacillales(100)	Bacillales_Incertae_Sedis_X(100)	Thermicanus(100)			96	0	0	0	0	0	0	0	0	0	0	0	0	0	0	0	0	0	0	0	0	0	0	0	0	0	0	0	0	0	0	0	0	0	0	0	0	0	0	0
Otu000163	95	Proteobacteria(100)	Betaproteobacteria(100)	Burkholderiales(100)	Comamonadaceae(100)	Comamonas(100)			0	0	0	0	0	0	0	0	0	0	0	0	0	0	95	0	0	0	0	0	0	0	0	0	0	0	0	0	0	0	0	0	0	0	0	0	0	0	0	0
Otu000164	95	Actinobacteria(100)	Actinobacteria(100)	Actinomycetales(100)	Nocardioidaceae(100)	Marmoricola(100)			95	0	0	0	0	0	0	0	0	0	0	0	0	0	0	0	0	0	0	0	0	0	0	0	0	0	0	0	0	0	0	0	0	0	0	0	0	0	0	0
Otu000165	92	Bacteroidetes(100)	Bacteroidia(100)	Bacteroidales(100)	Porphyromonadaceae(100)	Barnesiella(100)			0	0	0	0	0	0	0	0	0	0	0	0	0	0	0	0	0	0	0	0	0	0	0	0	0	0	0	0	0	0	0	0	0	0	0	0	0	0	0	92
Otu000166	92	Actinobacteria(100)	Actinobacteria(100)	Actinomycetales(100)	Intrasporangiaceae(100)	Ornithinimicrobium(100)			0	92	0	0	0	0	0	0	0	0	0	0	0	0	0	0	0	0	0	0	0	0	0	0	0	0	0	0	0	0	0	0	0	0	0	0	0	0	0	0
Otu000167	92	Bacteroidetes(100)	Flavobacteriia(100)	Flavobacteriales(100)	Flavobacteriaceae(100)	Empedobacter(100)			0	0	0	0	0	0	0	0	0	0	0	0	0	0	0	0	0	0	0	0	0	0	0	0	0	0	0	0	0	46	0	0	0	0	0	45	0	0	1	0
Otu000168	91	Bacteroidetes(100)	Cytophagia(100)	Cytophagales(100)	Cytophagaceae(100)	Hymenobacter(100)			91	0	0	0	0	0	0	0	0	0	0	0	0	0	0	0	0	0	0	0	0	0	0	0	0	0	0	0	0	0	0	0	0	0	0	0	0	0	0	0
Otu000169	86	Firmicutes(100)	Bacilli(100)	Bacillales(100)	Bacillaceae_1(100)	Anoxybacillus(100)			0	0	0	0	0	0	0	0	0	0	0	0	0	0	0	0	0	0	0	0	0	0	0	0	0	0	0	0	0	0	0	0	0	0	0	0	0	86	0	0
Otu000170	86	Firmicutes(100)	Bacilli(100)	Lactobacillales(100)	Streptococcaceae(100)	Streptococcus(100)			0	0	0	0	0	0	0	0	4	0	1	1	0	0	3	0	0	2	3	2	0	3	1	0	16	0	0	0	30	10	0	1	1	0	3	1	0	0	4	0
Otu000171	86	Firmicutes(100)	Clostridia(100)	Clostridiales(100)	Lachnospiraceae(100)	Ruminococcus2(100)			0	0	0	0	0	0	0	0	0	0	86	0	0	0	0	0	0	0	0	0	0	0	0	0	0	0	0	0	0	0	0	0	0	0	0	0	0	0	0	0
Otu000172	81	Firmicutes(100)	Bacilli(100)	unclassified(100)	unclassified(100)	unclassified(100)			0	0	0	0	0	0	0	0	3	0	0	0	0	1	0	3	0	46	5	1	1	1	3	0	0	0	0	0	8	0	0	3	0	1	3	0	0	0	0	2
Otu000173	80	Actinobacteria(100)	Actinobacteria(100)	Actinomycetales(100)	Corynebacteriaceae(100)	Corynebacterium(100)			0	0	0	0	0	0	0	0	6	0	0	0	0	0	0	12	0	0	0	0	0	9	0	0	23	7	0	0	0	0	0	3	0	0	20	0	0	0	0	0
Otu000174	79	Actinobacteria(100)	Actinobacteria(100)	Coriobacteriales(100)	Coriobacteriaceae(100)	Collinsella(100)			0	0	0	0	0	0	0	0	0	0	0	0	0	0	0	0	0	0	0	0	0	0	0	0	0	0	0	0	0	0	0	0	0	0	79	0	0	0	0	0
Otu000175	79	Proteobacteria(100)	Alphaproteobacteria(100)	Rhizobiales(100)	Methylobacteriaceae(100)	Methylobacterium(100)			0	0	0	0	0	0	0	0	0	0	19	0	0	57	0	0	0	0	0	0	0	0	0	0	0	0	0	0	2	0	0	0	0	0	0	0	0	0	0	1
Otu000176	79	Firmicutes(100)	Bacilli(100)	Lactobacillales(100)	Enterococcaceae(100)	Enterococcus(99)			0	0	0	0	0	0	79	0	0	0	0	0	0	0	0	0	0	0	0	0	0	0	0	0	0	0	0	0	0	0	0	0	0	0	0	0	0	0	0	0
Otu000177	75	Firmicutes(100)	Clostridia(100)	Clostridiales(100)	unclassified(100)	unclassified(100)			0	0	0	0	0	0	0	0	0	0	0	0	0	0	0	0	0	0	0	0	0	63	0	0	0	0	0	0	0	12	0	0	0	0	0	0	0	0	0	0
Otu000178	75	Bacteroidetes(100)	Bacteroidia(100)	Bacteroidales(100)	Porphyromonadaceae(100)	Porphyromonas(98)			0	0	0	0	0	0	0	0	0	0	0	0	0	0	0	0	0	0	0	0	0	23	0	0	52	0	0	0	0	0	0	0	0	0	0	0	0	0	0	0
Otu000179	74	Firmicutes(100)	Clostridia(100)	Clostridiales(100)	Lachnospiraceae(100)	unclassified(100)			0	0	0	0	0	0	0	0	0	0	0	0	0	0	0	0	0	0	0	0	0	0	0	0	0	0	0	0	0	0	0	0	0	0	0	0	0	0	0	74
Otu000180	72	Firmicutes(100)	Bacilli(100)	Bacillales(100)	Staphylococcaceae(100)	Staphylococcus(100)			0	0	0	0	0	0	0	0	0	12	0	0	0	0	4	0	0	0	2	0	28	0	1	12	0	4	0	4	1	0	0	1	0	0	2	0	0	0	1	0
Otu000181	68	Firmicutes(100)	Erysipelotrichia(100)	Erysipelotrichales(100)	Erysipelotrichaceae(100)	Holdemanella(100)			0	0	0	0	0	0	0	0	0	0	0	0	0	0	0	0	0	0	0	0	0	0	0	0	0	0	0	0	0	0	0	0	0	0	68	0	0	0	0	0
Otu000182	67	Firmicutes(100)	Negativicutes(100)	Selenomonadales(100)	Veillonellaceae(100)	unclassified(92)			0	0	0	0	0	0	0	0	0	0	0	0	0	0	0	0	0	0	0	0	0	0	0	0	0	0	0	0	0	0	0	0	0	0	67	0	0	0	0	0
Otu000183	67	Bacteroidetes(100)	Bacteroidia(100)	Bacteroidales(100)	Prevotellaceae(100)	Prevotella(100)			0	0	0	0	0	0	0	0	0	18	0	0	0	0	0	0	0	0	0	0	0	2	0	0	0	0	0	0	0	0	0	0	0	0	47	0	0	0	0	0
Otu000184	66	Bacteroidetes(100)	Bacteroidia(100)	Bacteroidales(100)	Bacteroidaceae(100)	Bacteroides(100)			0	0	66	0	0	0	0	0	0	0	0	0	0	0	0	0	0	0	0	0	0	0	0	0	0	0	0	0	0	0	0	0	0	0	0	0	0	0	0	0
Otu000185	66	Firmicutes(100)	Clostridia(100)	Clostridiales(100)	Lachnospiraceae(100)	Blautia(100)			0	0	0	0	0	0	0	11	0	0	0	0	0	0	0	0	0	0	0	0	0	0	0	0	0	0	0	0	0	0	0	0	0	0	0	0	0	0	0	55
Otu000186	66	Proteobacteria(100)	Gammaproteobacteria(100)	Chromatiales(100)	Chromatiaceae(100)	Rheinheimera(100)			0	0	0	0	0	0	0	0	0	0	0	0	0	0	0	0	0	0	0	0	0	0	0	0	0	0	0	0	0	0	0	0	0	0	0	66	0	0	0	0
Otu000187	64	Actinobacteria(100)	Actinobacteria(100)	Actinomycetales(100)	Brevibacteriaceae(100)	Brevibacterium(100)			0	0	0	0	0	0	0	0	0	0	0	4	0	0	0	0	9	12	0	0	0	0	0	0	0	0	4	25	0	0	7	0	0	0	3	0	0	0	0	0
Otu000188	63	Actinobacteria(100)	Actinobacteria(100)	Actinomycetales(100)	unclassified(100)	unclassified(100)			0	0	0	0	0	0	0	0	0	0	0	0	0	0	0	0	0	0	0	0	0	0	0	0	0	0	0	0	0	0	0	0	0	0	63	0	0	0	0	0
Otu000189	63	Proteobacteria(100)	Deltaproteobacteria(100)	Myxococcales(100)	unclassified(100)	unclassified(100)			0	0	0	0	0	0	0	0	0	0	0	0	0	0	0	0	0	0	0	0	0	0	0	0	0	0	0	0	0	0	0	0	0	0	0	0	0	63	0	0
Otu000190	62	Firmicutes(100)	Clostridia(100)	Clostridiales(100)	Ruminococcaceae(100)	unclassified(100)			0	0	0	0	0	0	0	0	0	0	0	0	0	0	0	0	0	0	0	0	0	0	0	0	0	0	0	0	0	0	62	0	0	0	0	0	0	0	0	0
Otu000191	62	Firmicutes(100)	Bacilli(100)	Lactobacillales(100)	Aerococcaceae(100)	Aerococcus(100)			0	0	0	0	0	0	0	0	0	0	0	10	0	0	0	0	0	3	0	0	0	20	0	0	0	16	0	0	0	0	0	0	0	0	0	13	0	0	0	0
Otu000192	62	Firmicutes(100)	Clostridia(100)	Clostridiales(100)	Clostridiales_Incertae_Sedis_XI(100)	Parvimonas(100)			0	0	0	0	0	0	0	0	0	0	0	0	0	0	0	0	0	0	0	0	0	62	0	0	0	0	0	0	0	0	0	0	0	0	0	0	0	0	0	0
Otu000193	62	Proteobacteria(100)	Gammaproteobacteria(100)	Enterobacteriales(100)	Enterobacteriaceae(100)	Serratia(71)			0	0	0	0	0	0	0	8	0	0	0	0	0	0	0	0	0	0	0	0	0	0	0	0	0	0	0	0	0	0	0	0	0	0	0	45	9	0	0	0
Otu000194	61	Actinobacteria(100)	Actinobacteria(100)	Actinomycetales(100)	unclassified(100)	unclassified(100)			0	0	0	0	0	0	0	0	0	0	0	0	0	0	0	9	0	0	9	0	0	0	0	3	0	0	0	0	7	0	0	15	2	0	16	0	0	0	0	0
Otu000195	60	Actinobacteria(100)	Actinobacteria(100)	Actinomycetales(100)	Corynebacteriaceae(100)	Corynebacterium(100)			0	0	0	0	0	0	0	0	0	0	0	0	0	0	0	0	55	0	0	0	0	0	0	0	0	0	0	0	0	0	0	0	0	0	0	5	0	0	0	0
Otu000196	59	Candidatus_Saccharibacteria(100)	unclassified(100)	unclassified(100)	unclassified(100)	unclassified(100)			0	0	0	0	0	0	0	0	0	0	0	0	0	0	0	0	0	0	0	0	0	0	0	0	4	0	0	0	0	0	0	0	0	0	55	0	0	0	0	0
Otu000197	58	Proteobacteria(100)	Betaproteobacteria(100)	Burkholderiales(100)	Comamonadaceae(100)	unclassified(61)			0	0	0	0	0	0	0	6	0	0	0	0	0	0	0	0	0	1	2	0	0	17	0	0	0	0	0	0	0	0	0	0	0	0	0	3	29	0	0	0
Otu000198	57	unclassified(100)	unclassified(100)	unclassified(100)	unclassified(100)	unclassified(100)			0	0	3	0	16	0	0	5	0	0	0	4	0	0	0	0	0	2	4	0	0	0	0	0	0	0	0	0	0	0	0	0	0	0	0	0	0	15	4	0
Otu000199	56	Bacteroidetes(100)	Bacteroidia(100)	Bacteroidales(100)	Bacteroidaceae(100)	Bacteroides(100)			0	0	0	0	0	0	0	0	0	0	0	0	0	0	0	0	0	0	0	0	0	0	0	0	0	0	0	0	0	0	0	0	0	0	56	0	0	0	0	0
Otu000200	55	Firmicutes(100)	Bacilli(100)	Lactobacillales(100)	Streptococcaceae(99)	Streptococcus(97)			0	0	0	0	0	0	0	0	2	0	1	0	0	0	2	0	0	1	6	1	0	3	15	0	0	0	1	0	10	2	0	1	2	0	3	1	0	0	0	4
Otu000201	55	Proteobacteria(100)	Alphaproteobacteria(100)	Rhizobiales(100)	Methylobacteriaceae(100)	Methylobacterium(100)			0	0	0	0	0	0	0	0	0	0	0	0	0	0	0	0	0	0	0	0	0	0	0	0	0	0	0	0	0	0	0	0	0	0	0	0	0	0	0	0
Otu000202	55	Proteobacteria(100)	Alphaproteobacteria(100)	Sphingomonadales(100)	Sphingomonadaceae(100)	unclassified(100)			0	0	0	0	0	0	0	0	0	0	0	0	0	0	0	0	0	0	0	0	0	0	0	0	0	0	0	0	0	0	0	0	0	0	55	0	0	0	0	0
Otu000203	54	Firmicutes(100)	Clostridia(100)	Clostridiales(100)	Ruminococcaceae(100)	Ruminococcus(100)			0	0	0	0	0	0	0	0	0	0	0	0	0	0	0	0	0	0	0	0	0	0	0	0	0	0	0	0	0	0	0	0	0	0	54	0	0	0	0	0
Otu000204	54	Firmicutes(100)	Bacilli(100)	Lactobacillales(100)	Streptococcaceae(100)	Streptococcus(100)			0	0	0	0	0	0	0	0	2	0	2	0	0	0	7	0	0	3	1	2	0	3	4	0	13	0	0	0	9	6	0	1	0	0	0	1	0	0	0	0
Otu000205	54	Firmicutes(100)	Clostridia(100)	Clostridiales(100)	Peptostreptococcaceae(100)	Peptostreptococcus(100)			0	0	0	0	0	0	0	0	0	0	0	0	0	0	0	0	0	0	0	0	0	15	0	0	4	0	0	0	0	0	0	0	0	0	35	0	0	0	0	0
Otu000206	51	unclassified(100)	unclassified(100)	unclassified(100)	unclassified(100)	unclassified(100)			0	0	0	0	0	0	0	0	0	0	0	0	0	0	0	0	0	0	0	0	0	0	0	0	0	0	0	0	0	0	0	0	0	0	51	0	0	0	0	0
Otu000207	49	Firmicutes(100)	Clostridia(100)	Clostridiales(100)	Lachnospiraceae(100)	unclassified(100)			0	0	0	0	0	0	0	0	0	0	48	0	0	0	1	0	0	0	0	0	0	0	0	0	0	0	0	0	0	0	0	0	0	0	0	0	0	0	0	0
Otu000208	49	Actinobacteria(100)	Actinobacteria(100)	Actinomycetales(100)	Corynebacteriaceae(100)	Corynebacterium(100)			0	0	0	0	0	0	0	0	0	0	0	0	0	0	0	0	0	0	0	0	0	0	0	0	0	0	0	0	0	0	0	0	0	0	49	0	0	0	0	0
Otu000209	49	Firmicutes(100)	Clostridia(100)	Clostridiales(100)	Eubacteriaceae(98)	Eubacterium(98)			0	0	0	0	0	0	0	0	0	0	0	0	0	0	0	0	0	0	0	0	0	0	0	48	0	0	1	0	0	0	0	0	0	0	0	0	0	0	0	0
Otu000210	49	Proteobacteria(100)	Gammaproteobacteria(100)	Pseudomonadales(100)	Moraxellaceae(100)	Moraxella(100)			0	0	0	0	0	0	0	0	0	0	0	32	0	0	0	0	0	12	4	1	0	0	0	0	0	0	0	0	0	0	0	0	0	0	0	0	0	0	0	0
Otu000211	49	Firmicutes(100)	Bacilli(100)	Lactobacillales(100)	Streptococcaceae(100)	Streptococcus(100)			0	0	0	0	0	0	0	0	0	0	0	0	0	0	0	0	0	0	0	0	0	0	0	0	1	0	0	0	0	0	0	0	0	0	48	0	0	0	0	0
Otu000212	48	Actinobacteria(100)	Actinobacteria(100)	Actinomycetales(100)	Corynebacteriaceae(100)	Corynebacterium(100)			0	0	0	0	0	0	0	0	0	0	0	0	0	0	0	0	0	0	0	0	0	0	0	0	31	0	0	0	7	0	0	0	0	0	10	0	0	0	0	0
Otu000213	48	Fusobacteria(100)	Fusobacteriia(100)	Fusobacteriales(100)	Leptotrichiaceae(100)	Leptotrichia(100)			0	0	0	0	0	0	0	0	0	0	0	0	0	0	0	0	0	0	0	0	0	0	0	0	0	0	0	0	0	0	0	0	0	0	48	0	0	0	0	0
Otu000214	48	Firmicutes(100)	Bacilli(100)	Lactobacillales(100)	Aerococcaceae(100)	Facklamia(100)			0	0	0	0	0	0	0	0	2	0	0	0	0	0	0	0	0	0	0	0	0	9	0	0	0	0	0	0	0	0	0	8	0	0	29	0	0	0	0	0
Otu000215	46	Proteobacteria(100)	Gammaproteobacteria(100)	Pseudomonadales(100)	Moraxellaceae(100)	Enhydrobacter(100)			0	0	0	0	0	0	0	0	0	0	0	0	0	38	0	0	0	0	0	0	0	8	0	0	0	0	0	0	0	0	0	0	0	0	0	0	0	0	0	0
Otu000216	45	Actinobacteria(100)	Actinobacteria(100)	Actinomycetales(100)	Actinomycetaceae(100)	Varibaculum(100)			0	0	0	0	0	0	0	0	0	0	0	0	0	0	0	0	0	0	0	0	0	2	0	0	0	0	0	0	0	0	0	0	0	0	43	0	0	0	0	0
Otu000217	45	Bacteroidetes(100)	Bacteroidia(100)	Bacteroidales(100)	Prevotellaceae(100)	Prevotella(100)			0	0	0	0	0	0	0	0	0	0	0	0	0	0	0	0	0	0	0	0	0	0	0	0	0	0	0	0	0	0	0	0	0	0	45	0	0	0	0	0
Otu000218	44	Candidatus_Saccharibacteria(100)	unclassified(100)	unclassified(100)	unclassified(100)	unclassified(100)			0	0	0	0	0	0	0	0	0	0	0	0	0	0	0	0	0	0	0	0	0	0	0	0	0	0	0	0	0	0	0	0	0	0	44	0	0	0	0	0
Otu000219	43	Firmicutes(100)	Bacilli(100)	Lactobacillales(100)	Streptococcaceae(100)	Streptococcus(100)			0	0	0	0	0	0	0	0	7	0	0	1	0	0	1	3	0	5	0	1	0	1	6	0	1	0	1	0	13	0	1	1	0	0	1	0	0	0	0	0
Otu000220	43	Firmicutes(100)	Clostridia(100)	Clostridiales(100)	Lachnospiraceae(100)	Blautia(100)			0	0	0	0	0	0	0	0	0	0	0	0	0	0	0	0	0	0	0	0	0	0	0	8	0	0	0	0	0	0	0	0	0	0	35	0	0	0	0	0
Otu000221	40	Actinobacteria(100)	Actinobacteria(100)	Actinomycetales(100)	Actinomycetaceae(98)	unclassified(98)			0	0	0	0	0	0	0	0	0	0	0	0	0	0	0	0	0	0	0	0	0	0	0	0	3	0	0	0	0	0	0	0	33	0	4	0	0	0	0	0
Otu000222	40	Proteobacteria(100)	Gammaproteobacteria(100)	Pseudomonadales(100)	Pseudomonadaceae(100)	Pseudomonas(100)			0	0	0	0	0	0	0	0	0	0	0	0	0	0	1	0	0	0	0	0	0	0	0	0	0	0	0	11	0	0	0	28	0	0	0	0	0	0	0	0
Otu000223	39	Bacteroidetes(100)	Bacteroidia(100)	Bacteroidales(100)	Porphyromonadaceae(100)	Odoribacter(100)			0	0	0	0	0	0	0	0	0	0	0	0	0	0	0	0	0	0	0	0	1	0	0	0	0	38	0	0	0	0	0	0	0	0	0	0	0	0	0	0
Otu000224	37	Firmicutes(100)	Bacilli(100)	Lactobacillales(100)	Streptococcaceae(100)	Streptococcus(100)			0	0	0	0	0	0	0	0	6	0	0	0	0	0	0	0	0	0	8	0	0	1	0	0	0	0	0	0	0	0	0	21	0	0	1	0	0	0	0	0
Otu000225	37	Bacteroidetes(100)	Flavobacteriia(100)	Flavobacteriales(100)	Flavobacteriaceae(100)	unclassified(100)			37	0	0	0	0	0	0	0	0	0	0	0	0	0	0	0	0	0	0	0	0	0	0	0	0	0	0	0	0	0	0	0	0	0	0	0	0	0	0	0
Otu000226	37	Proteobacteria(100)	Gammaproteobacteria(100)	Cardiobacteriales(100)	Cardiobacteriaceae(100)	Cardiobacterium(100)			0	0	0	0	0	0	0	0	0	0	0	0	0	0	0	0	0	0	0	0	0	0	0	0	0	0	0	0	0	0	0	0	0	0	37	0	0	0	0	0
Otu000227	36	Fusobacteria(100)	Fusobacteriia(100)	Fusobacteriales(100)	Leptotrichiaceae(100)	Leptotrichia(100)			0	0	0	0	0	0	0	0	0	0	0	0	0	0	0	0	0	0	0	0	0	0	0	0	0	0	0	0	0	0	36	0	0	0	0	0	0	0	0	0
Otu000228	36	Proteobacteria(100)	Epsilonproteobacteria(100)	Campylobacterales(100)	Campylobacteraceae(100)	Campylobacter(100)			0	0	0	0	0	0	0	0	0	0	0	0	0	0	0	0	0	0	0	0	0	14	0	0	0	0	0	0	0	0	0	0	0	0	22	0	0	0	0	0
Otu000229	36	Candidatus_Saccharibacteria(100)	unclassified(100)	unclassified(100)	unclassified(100)	unclassified(100)			0	0	0	0	0	0	0	0	0	0	0	0	0	0	0	0	32	0	0	0	0	0	0	4	0	0	0	0	0	0	0	0	0	0	0	0	0	0	0	0
Otu000230	36	Acidobacteria(100)	Acidobacteria_Gp6(100)	Gp6(100)	unclassified(100)	unclassified(100)			0	0	0	0	0	0	0	0	0	0	0	0	0	0	0	0	0	0	0	0	0	0	0	0	0	36	0	0	0	0	0	0	0	0	0	0	0	0	0	0
Otu000231	36	Firmicutes(100)	Bacilli(100)	Lactobacillales(100)	Lactobacillaceae(100)	Lactobacillus(100)			0	0	0	0	0	0	0	0	0	0	0	0	0	0	0	0	0	0	0	0	0	0	0	0	10	0	0	0	0	0	0	0	0	0	16	10	0	0	0	0
Otu000232	35	Proteobacteria(100)	Gammaproteobacteria(100)	Pseudomonadales(100)	Moraxellaceae(100)	Acinetobacter(100)			0	0	0	0	0	0	0	0	0	0	0	5	0	0	0	0	0	0	0	0	0	25	0	0	0	0	0	0	0	0	0	0	0	5	0	0	0	0	0	0
Otu000233	35	Proteobacteria(100)	Alphaproteobacteria(100)	Sphingomonadales(100)	Sphingomonadaceae(100)	Sphingomonas(63)			0	0	0	0	0	0	0	0	0	0	0	0	0	0	0	0	0	0	0	0	0	0	0	0	0	22	0	0	0	0	0	0	0	0	0	0	0	0	0	13
Otu000234	34	Firmicutes(100)	Clostridia(100)	Clostridiales(100)	Lachnospiraceae(100)	unclassified(100)			0	0	0	0	0	0	0	0	0	0	0	0	0	0	0	0	0	0	0	0	0	0	0	0	0	0	0	34	0	0	0	0	0	0	0	0	0	0	0	0
Otu000235	34	Proteobacteria(100)	Gammaproteobacteria(100)	Pseudomonadales(100)	Moraxellaceae(100)	Psychrobacter(100)			0	0	0	0	0	0	0	0	0	0	0	0	0	0	0	0	0	0	0	0	0	0	0	0	0	0	0	18	0	0	0	0	16	0	0	0	0	0	0	0
Otu000236	34	Actinobacteria(100)	Actinobacteria(100)	Actinomycetales(100)	Corynebacteriaceae(100)	Corynebacterium(100)			0	0	0	0	0	0	0	0	0	0	0	0	0	0	0	15	0	19	0	0	0	0	0	0	0	0	0	0	0	0	0	0	0	0	0	0	0	0	0	0
Otu000237	33	Firmicutes(100)	Bacilli(100)	Lactobacillales(100)	Streptococcaceae(100)	Streptococcus(100)			0	0	0	0	0	0	0	0	0	1	0	0	0	0	11	0	0	0	0	0	2	1	0	0	1	0	0	0	1	0	0	0	2	0	1	13	0	0	0	0
Otu000238	33	Bacteroidetes(100)	Bacteroidia(100)	Bacteroidales(100)	Bacteroidaceae(100)	Bacteroides(100)			0	0	0	0	0	0	0	0	0	0	0	0	0	0	0	0	0	0	0	0	0	0	0	0	0	0	0	33	0	0	0	0	0	0	0	0	0	0	0	0
Otu000239	33	Proteobacteria(100)	Gammaproteobacteria(100)	Pasteurellales(100)	Pasteurellaceae(100)	unclassified(100)			0	0	0	0	0	0	0	0	0	0	0	0	0	0	0	32	0	0	0	0	0	1	0	0	0	0	0	0	0	0	0	0	0	0	0	0	0	0	0	0
Otu000240	32	Proteobacteria(100)	Epsilonproteobacteria(100)	Campylobacterales(100)	Campylobacteraceae(100)	Campylobacter(100)			0	0	0	0	0	0	0	0	0	0	0	0	0	0	0	0	0	0	0	0	0	0	0	0	0	0	0	0	0	0	0	0	0	0	32	0	0	0	0	0
Otu000241	32	Firmicutes(100)	Clostridia(100)	Clostridiales(100)	Ruminococcaceae(100)	unclassified(100)			0	0	0	0	0	0	0	0	0	0	0	0	0	0	0	0	0	0	0	0	0	0	0	0	0	0	0	0	0	0	0	0	0	0	0	0	0	0	0	32
Otu000242	32	Firmicutes(100)	Clostridia(100)	Clostridiales(100)	Lachnospiraceae(100)	Lachnoanaerobaculum(100)			0	0	0	0	0	0	0	0	0	0	0	0	0	0	0	0	0	0	0	0	0	0	0	0	3	0	0	0	0	0	0	0	0	0	29	0	0	0	0	0
Otu000243	31	Proteobacteria(100)	Betaproteobacteria(100)	Burkholderiales(100)	Comamonadaceae(100)	Variovorax(52)			0	0	0	0	0	0	0	0	0	0	0	0	0	0	0	0	0	0	0	0	0	0	0	15	4	0	1	0	0	0	0	0	0	0	11	0	0	0	0	0
Otu000244	31	Firmicutes(100)	Clostridia(100)	Clostridiales(100)	Lachnospiraceae(100)	Stomatobaculum(100)			0	0	0	0	0	0	0	0	0	0	0	0	0	0	0	0	0	0	0	0	0	0	0	0	0	0	0	0	0	0	0	0	0	0	31	0	0	0	0	0
Otu000245	30	Actinobacteria(100)	Actinobacteria(100)	Actinomycetales(100)	Actinomycetaceae(100)	Actinomyces(100)			0	0	0	0	0	0	0	0	0	0	0	0	5	0	0	0	0	0	0	0	0	5	0	0	0	0	2	0	0	0	0	0	0	0	18	0	0	0	0	0
Otu000246	30	Firmicutes(100)	Clostridia(100)	Clostridiales(100)	Peptoniphilaceae(100)	Peptoniphilus(100)			0	0	0	0	0	0	0	0	0	0	0	5	0	0	0	0	0	0	0	0	0	25	0	0	0	0	0	0	0	0	0	0	0	0	0	0	0	0	0	0
Otu000247	30	SR1(100)	unclassified(100)	unclassified(100)	unclassified(100)	unclassified(100)			0	0	0	0	0	0	0	0	0	0	0	0	0	0	0	0	0	0	0	0	0	0	0	0	3	0	0	0	0	0	0	0	0	0	27	0	0	0	0	0
Otu000248	30	Fusobacteria(100)	Fusobacteriia(100)	Fusobacteriales(100)	Leptotrichiaceae(100)	Streptobacillus(100)			0	0	0	0	0	0	0	0	0	0	0	0	0	0	0	0	0	0	0	0	0	0	0	0	30	0	0	0	0	0	0	0	0	0	0	0	0	0	0	0
Otu000249	29	Firmicutes(100)	Clostridia(100)	Clostridiales(100)	Peptoniphilaceae(100)	Peptoniphilus(100)			0	0	0	0	0	0	0	0	0	0	0	0	0	0	0	0	0	0	0	0	0	29	0	0	0	0	0	0	0	0	0	0	0	0	0	0	0	0	0	0
Otu000250	29	Actinobacteria(100)	Actinobacteria(100)	Actinomycetales(100)	Propionibacteriaceae(100)	unclassified(100)			0	0	0	0	0	0	0	0	0	0	0	0	0	0	0	0	0	0	0	0	0	0	0	0	5	0	0	0	0	0	0	0	0	0	24	0	0	0	0	0
Otu000251	28	Actinobacteria(100)	Actinobacteria(100)	Actinomycetales(100)	Actinomycetaceae(100)	Actinomyces(100)			0	0	0	0	0	0	0	0	0	0	0	0	0	0	0	0	0	0	0	0	0	4	0	0	18	0	0	0	0	0	0	0	0	0	6	0	0	0	0	0
Otu000252	28	Firmicutes(100)	Bacilli(100)	Bacillales(100)	Bacillales_Incertae_Sedis_XII(100)	Exiguobacterium(100)			0	0	0	0	0	0	0	0	0	0	0	0	0	0	0	0	0	0	0	0	0	0	0	28	0	0	0	0	0	0	0	0	0	0	0	0	0	0	0	0
Otu000253	28	Proteobacteria(100)	Gammaproteobacteria(100)	Pseudomonadales(100)	Moraxellaceae(100)	Psychrobacter(100)			0	0	0	0	0	0	0	0	0	0	0	0	0	0	0	0	0	0	0	0	0	0	0	0	0	0	0	28	0	0	0	0	0	0	0	0	0	0	0	0
Otu000254	28	Proteobacteria(100)	Alphaproteobacteria(100)	Rhizobiales(100)	Bradyrhizobiaceae(100)	Bosea(100)			0	0	0	0	0	0	0	0	0	1	0	0	0	0	2	0	0	0	0	0	0	0	0	0	0	0	0	0	0	0	0	0	0	0	25	0	0	0	0	0
Otu000255	27	Bacteroidetes(100)	Flavobacteriia(100)	Flavobacteriales(100)	Flavobacteriaceae(100)	unclassified(100)			0	0	0	0	0	0	0	0	0	0	0	0	0	0	0	0	0	0	0	0	0	0	0	0	16	0	0	0	0	0	0	0	2	0	0	0	0	0	9	0
Otu000256	27	Proteobacteria(100)	Betaproteobacteria(100)	Burkholderiales(100)	Comamonadaceae(67)	Comamonas(67)			0	0	0	0	0	0	0	0	0	0	0	0	0	0	0	0	0	0	0	0	0	9	0	0	0	0	3	0	0	0	0	0	0	0	0	6	0	9	0	0
Otu000257	27	Firmicutes(100)	Clostridia(100)	Clostridiales(100)	Clostridiales_Incertae_Sedis_XIII(97)	unclassified(97)			0	0	0	0	0	0	0	0	0	0	0	0	0	0	0	0	0	0	0	0	0	0	0	0	0	0	0	0	0	0	0	0	0	0	27	0	0	0	0	0
Otu000258	26	Proteobacteria(100)	Gammaproteobacteria(100)	Alteromonadales(100)	Shewanellaceae(100)	Shewanella(100)			0	0	0	0	0	0	0	0	0	0	0	0	0	0	0	0	0	0	0	0	0	0	0	0	0	0	0	1	0	0	0	0	0	0	0	25	0	0	0	0
Otu000259	26	Firmicutes(100)	Bacilli(100)	unclassified(100)	unclassified(100)	unclassified(100)			0	0	0	0	0	0	0	0	2	1	1	0	0	1	1	0	0	0	2	0	0	0	2	0	0	0	0	2	6	0	0	1	3	0	1	0	0	0	1	2
Otu000260	25	Firmicutes(100)	Bacilli(100)	Bacillales(100)	Listeriaceae(100)	Brochothrix(100)			0	0	0	0	0	0	0	0	0	0	0	0	0	0	0	0	0	0	0	0	0	0	0	0	0	0	0	25	0	0	0	0	0	0	0	0	0	0	0	0
Otu000261	25	Firmicutes(100)	Bacilli(100)	Lactobacillales(100)	Streptococcaceae(100)	Streptococcus(100)			0	0	0	0	0	0	0	0	1	0	0	0	0	0	0	0	0	0	1	0	0	0	0	0	1	0	0	0	1	11	0	0	0	0	1	0	0	0	9	0
Otu000262	25	Proteobacteria(100)	Alphaproteobacteria(100)	Rhodospirillales(100)	Acetobacteraceae(100)	unclassified(100)			0	0	0	0	0	0	0	0	0	0	0	0	0	0	0	0	0	0	0	0	0	0	0	0	0	0	0	0	0	0	0	0	25	0	0	0	0	0	0	0
Otu000263	25	Proteobacteria(100)	Betaproteobacteria(100)	Burkholderiales(100)	Comamonadaceae(100)	unclassified(100)			0	0	0	0	0	0	0	0	0	0	0	0	0	0	0	0	0	0	0	0	0	0	0	0	0	0	0	0	0	0	0	0	0	0	25	0	0	0	0	0
Otu000264	25	Proteobacteria(100)	Betaproteobacteria(100)	Burkholderiales(100)	Comamonadaceae(100)	Hydrogenophaga(100)			0	0	0	0	0	0	0	0	0	0	0	0	0	0	0	0	0	0	0	0	0	0	0	0	0	0	0	0	0	0	0	0	0	0	0	0	0	25	0	0
Otu000265	25	Fusobacteria(100)	Fusobacteriia(100)	Fusobacteriales(100)	Leptotrichiaceae(100)	Leptotrichia(100)			0	0	0	0	0	0	0	0	0	0	0	0	0	0	0	0	0	0	0	0	0	0	0	0	0	0	0	0	0	0	0	0	0	0	25	0	0	0	0	0
Otu000266	24	Firmicutes(100)	Clostridia(100)	Clostridiales(100)	Peptoniphilaceae(100)	Peptoniphilus(100)			0	0	0	0	0	0	0	0	0	0	0	0	0	0	0	0	0	0	0	0	0	24	0	0	0	0	0	0	0	0	0	0	0	0	0	0	0	0	0	0
Otu000267	24	Firmicutes(100)	Clostridia(100)	Clostridiales(100)	Ruminococcaceae(100)	unclassified(100)			0	0	0	0	0	0	0	0	0	0	0	0	0	0	0	0	0	0	0	0	0	0	0	0	0	0	0	24	0	0	0	0	0	0	0	0	0	0	0	0
Otu000268	24	Firmicutes(100)	Bacilli(100)	Bacillales(100)	Bacillales_Incertae_Sedis_XI(100)	Gemella(100)			0	0	0	0	0	0	0	0	2	0	0	0	0	0	0	1	0	0	0	0	0	0	1	0	16	0	0	0	1	0	0	1	0	0	0	0	0	0	2	0
Otu000269	24	Actinobacteria(100)	Actinobacteria(100)	Actinomycetales(100)	Propionibacteriaceae(100)	Propionibacterium(100)			0	0	0	0	0	0	0	0	1	0	0	0	0	0	0	0	0	0	0	0	0	0	0	0	0	0	0	0	0	0	0	0	23	0	0	0	0	0	0	0
Otu000270	24	Firmicutes(100)	Negativicutes(100)	Selenomonadales(100)	Veillonellaceae(100)	unclassified(100)			0	0	0	0	0	0	0	0	0	0	0	0	0	0	0	0	0	0	0	0	0	0	0	0	0	0	0	0	0	0	0	0	0	0	24	0	0	0	0	0
Otu000271	23	Firmicutes(100)	Bacilli(100)	Bacillales(100)	unclassified(83)	unclassified(83)			0	0	0	0	0	0	0	0	5	0	0	0	0	0	0	0	0	0	0	0	0	0	8	0	2	0	0	0	4	4	0	0	0	0	0	0	0	0	0	0
Otu000272	23	Proteobacteria(100)	Gammaproteobacteria(100)	unclassified(100)	unclassified(100)	unclassified(100)			0	0	0	0	0	0	0	0	0	0	0	0	0	0	0	0	0	0	0	0	0	0	0	0	0	0	0	0	0	0	0	0	0	0	0	0	0	0	23	0
Otu000273	23	Proteobacteria(100)	Gammaproteobacteria(100)	Pseudomonadales(100)	Moraxellaceae(100)	Acinetobacter(100)			0	0	0	0	0	0	0	0	0	0	0	0	0	0	10	0	0	2	0	0	0	0	0	2	0	0	0	1	0	1	0	0	0	0	0	7	0	0	0	0
Otu000274	23	Bacteroidetes(100)	Bacteroidia(100)	Bacteroidales(100)	Prevotellaceae(100)	Prevotella(100)			0	0	0	0	0	0	0	0	0	0	0	0	0	0	0	0	0	0	0	0	0	0	0	0	0	0	0	0	0	0	0	0	0	0	23	0	0	0	0	0
Otu000275	22	Proteobacteria(100)	Alphaproteobacteria(100)	Sphingomonadales(100)	Sphingomonadaceae(100)	Sphingopyxis(100)			0	0	0	0	22	0	0	0	0	0	0	0	0	0	0	0	0	0	0	0	0	0	0	0	0	0	0	0	0	0	0	0	0	0	0	0	0	0	0	0
Otu000276	22	Actinobacteria(100)	Actinobacteria(100)	Actinomycetales(100)	Micrococcaceae(100)	Rothia(100)			0	0	0	0	0	0	0	0	0	0	1	1	0	0	1	2	0	0	0	1	0	0	0	0	1	2	0	0	0	12	1	0	0	0	0	0	0	0	0	0
Otu000277	22	Proteobacteria(100)	Gammaproteobacteria(100)	Pseudomonadales(100)	Moraxellaceae(100)	Acinetobacter(100)			0	0	0	0	0	0	0	0	0	0	15	0	0	0	0	0	0	0	0	0	1	0	0	0	6	0	0	0	0	0	0	0	0	0	0	0	0	0	0	0
Otu000278	22	Proteobacteria(100)	Betaproteobacteria(100)	Neisseriales(100)	Neisseriaceae(100)	Kingella(100)			0	0	0	0	0	0	0	0	0	0	0	0	0	0	0	1	0	0	0	0	0	0	0	0	0	0	0	0	0	0	0	0	0	0	21	0	0	0	0	0
Otu000279	21	Firmicutes(100)	Clostridia(100)	Clostridiales(100)	Eubacteriaceae(100)	Eubacterium(100)			0	0	0	0	0	0	0	0	0	0	0	0	0	0	0	0	0	0	0	0	0	0	0	0	10	0	0	0	0	0	0	0	0	0	11	0	0	0	0	0
Otu000280	21	Firmicutes(100)	Clostridia(100)	Clostridiales(100)	Lachnospiraceae(100)	unclassified(100)			0	0	0	0	0	0	0	0	0	0	0	0	0	0	0	0	0	0	0	0	0	0	0	0	0	0	0	0	0	0	0	0	0	0	0	0	0	0	0	21
Otu000281	21	Actinobacteria(100)	Actinobacteria(100)	Actinomycetales(100)	Actinomycetaceae(100)	Mobiluncus(100)			0	0	0	0	0	0	0	0	0	0	0	0	0	0	0	0	0	0	0	0	0	2	0	0	0	0	0	0	0	0	0	0	0	0	19	0	0	0	0	0
Otu000282	21	Bacteroidetes(100)	Bacteroidia(100)	Bacteroidales(100)	Rikenellaceae(100)	unclassified(96)			0	0	0	0	0	0	0	0	0	0	0	0	0	0	0	0	0	0	21	0	0	0	0	0	0	0	0	0	0	0	0	0	0	0	0	0	0	0	0	0
Otu000283	21	Proteobacteria(100)	Betaproteobacteria(100)	Neisseriales(100)	Neisseriaceae(100)	unclassified(100)			0	0	0	0	0	0	0	0	0	0	0	0	0	0	0	0	0	0	0	0	0	6	0	0	15	0	0	0	0	0	0	0	0	0	0	0	0	0	0	0
Otu000284	20	Proteobacteria(100)	Gammaproteobacteria(100)	Pseudomonadales(100)	Pseudomonadaceae(100)	unclassified(70)			0	0	0	0	0	0	0	0	1	0	1	3	0	0	0	0	0	1	2	0	0	0	1	0	0	2	0	0	3	1	0	0	0	0	1	0	0	0	1	3
Otu000285	20	Proteobacteria(100)	unclassified(100)	unclassified(100)	unclassified(100)	unclassified(100)			0	0	0	0	0	0	0	0	0	0	0	0	0	0	0	0	0	0	0	0	0	0	0	0	0	0	0	0	0	0	0	0	0	0	0	0	0	20	0	0
Otu000286	20	Firmicutes(100)	Bacilli(100)	Bacillales(100)	unclassified(100)	unclassified(100)			0	0	0	0	0	0	0	0	0	0	0	0	0	0	0	0	0	0	0	0	0	0	0	0	0	0	0	0	0	0	0	0	20	0	0	0	0	0	0	0
Otu000287	19	Actinobacteria(100)	Actinobacteria(100)	Actinomycetales(100)	Corynebacteriaceae(100)	Corynebacterium(100)			0	0	0	0	0	0	0	0	0	0	0	0	0	0	0	0	0	0	0	0	0	0	0	0	0	19	0	0	0	0	0	0	0	0	0	0	0	0	0	0
Otu000288	19	Firmicutes(100)	Bacilli(100)	Lactobacillales(100)	Streptococcaceae(100)	Streptococcus(100)			0	0	0	0	0	0	0	0	5	0	0	0	0	0	0	0	0	1	5	0	0	0	0	0	0	0	0	0	2	1	0	2	0	0	2	0	0	0	0	1
Otu000289	18	Proteobacteria(100)	Gammaproteobacteria(100)	unclassified(100)	unclassified(100)	unclassified(100)			0	0	0	0	0	0	0	0	0	0	0	0	0	0	0	0	0	0	0	0	0	0	0	0	0	15	0	0	0	0	0	0	0	3	0	0	0	0	0	0
Otu000290	18	Firmicutes(100)	Negativicutes(100)	Selenomonadales(100)	Acidaminococcaceae(100)	Phascolarctobacterium(100)			0	0	0	0	0	0	0	0	0	0	0	0	0	0	0	0	0	0	0	0	0	0	0	0	0	0	0	0	0	0	0	0	0	0	0	0	0	0	0	18
Otu000291	18	Firmicutes(100)	Bacilli(100)	unclassified(100)	unclassified(100)	unclassified(100)			0	0	0	0	0	0	0	0	3	0	0	2	0	0	0	1	0	0	0	0	0	1	1	0	1	0	0	0	5	1	1	0	0	0	1	0	0	0	0	1
Otu000292	18	Proteobacteria(100)	Gammaproteobacteria(100)	Pseudomonadales(100)	Moraxellaceae(100)	Acinetobacter(95)			0	0	0	0	0	0	0	0	0	0	0	0	0	0	0	18	0	0	0	0	0	0	0	0	0	0	0	0	0	0	0	0	0	0	0	0	0	0	0	0
Otu000293	18	Bacteroidetes(100)	Bacteroidia(100)	Bacteroidales(100)	Bacteroidaceae(100)	Bacteroides(100)			0	0	0	0	0	0	0	0	0	0	0	0	0	0	0	0	0	0	0	0	0	0	0	0	0	0	0	0	0	0	0	0	4	0	14	0	0	0	0	0
Otu000294	18	Actinobacteria(100)	Actinobacteria(100)	Actinomycetales(100)	Propionibacteriaceae(100)	unclassified(89)			0	0	0	0	0	0	0	0	0	0	0	0	0	0	0	0	0	0	0	0	0	4	0	0	0	0	0	0	0	0	0	0	0	0	13	1	0	0	0	0
Otu000295	17	Firmicutes(100)	Negativicutes(100)	Selenomonadales(100)	Acidaminococcaceae(100)	Phascolarctobacterium(100)			0	0	0	0	0	0	0	0	0	0	0	0	0	0	0	0	0	0	0	0	0	0	0	0	0	0	0	0	0	0	0	0	0	0	17	0	0	0	0	0
Otu000296	17	Firmicutes(100)	Clostridia(100)	Clostridiales(100)	Lachnospiraceae(100)	unclassified(100)			0	0	0	0	0	0	0	0	0	0	0	0	0	0	0	0	0	0	0	0	0	0	0	0	0	0	0	0	0	0	0	0	0	0	17	0	0	0	0	0
Otu000297	17	Firmicutes(100)	Bacilli(100)	Bacillales(100)	Staphylococcaceae(100)	Staphylococcus(100)			0	0	0	0	0	0	0	0	2	0	0	0	0	0	0	1	0	4	0	0	0	0	0	0	3	0	0	0	6	0	0	0	0	0	0	1	0	0	0	0
Otu000298	17	unclassified(100)	unclassified(100)	unclassified(100)	unclassified(100)	unclassified(100)			0	0	0	0	0	0	0	0	0	0	0	0	0	0	0	0	0	0	0	0	0	0	0	0	0	0	0	0	0	0	0	0	0	0	0	0	0	17	0	0
Otu000299	17	Firmicutes(100)	Clostridia(100)	Clostridiales(100)	Lachnospiraceae(100)	unclassified(100)			0	0	0	0	0	0	0	0	0	0	0	0	0	0	0	0	0	0	0	0	0	0	0	0	0	0	0	0	0	0	0	0	0	0	17	0	0	0	0	0
Otu000300	17	Fusobacteria(100)	Fusobacteriia(100)	Fusobacteriales(100)	Fusobacteriaceae(100)	Fusobacterium(100)			0	0	0	0	0	0	0	0	0	0	0	0	0	0	0	0	0	0	0	0	0	0	0	0	0	0	0	0	0	1	0	0	0	16	0	0	0	0	0	0
Otu000301	17	Bacteroidetes(100)	Bacteroidia(100)	Bacteroidales(100)	Prevotellaceae(100)	Prevotella(100)			0	0	0	0	0	0	0	0	0	0	0	0	0	0	0	0	0	0	0	0	0	17	0	0	0	0	0	0	0	0	0	0	0	0	0	0	0	0	0	0
Otu000302	17	Firmicutes(100)	Erysipelotrichia(100)	Erysipelotrichales(100)	Erysipelotrichaceae(100)	Clostridium_XVIII(100)			0	0	0	0	0	0	0	0	0	0	0	0	0	0	0	0	0	17	0	0	0	0	0	0	0	0	0	0	0	0	0	0	0	0	0	0	0	0	0	0
Otu000303	17	unclassified(100)	unclassified(100)	unclassified(100)	unclassified(100)	unclassified(100)			0	0	0	0	0	0	0	0	0	0	0	0	0	0	0	0	0	0	0	0	0	0	0	17	0	0	0	0	0	0	0	0	0	0	0	0	0	0	0	0
Otu000304	17	Firmicutes(100)	Bacilli(100)	Lactobacillales(100)	unclassified(100)	unclassified(100)			0	0	0	0	0	0	0	0	2	0	1	2	0	0	0	0	0	0	1	1	0	0	5	0	0	0	0	0	1	1	0	1	1	0	0	0	0	0	1	0
Otu000305	16	Firmicutes(100)	Bacilli(100)	Lactobacillales(100)	unclassified(100)	unclassified(100)			0	0	0	0	0	0	0	0	2	0	0	0	0	1	0	0	0	3	0	0	0	1	0	0	2	0	0	0	3	0	0	0	1	0	0	0	0	0	3	0
Otu000306	16	Proteobacteria(100)	Gammaproteobacteria(100)	Pseudomonadales(100)	Moraxellaceae(100)	Acinetobacter(94)			0	0	0	0	0	0	0	0	0	0	0	0	0	0	5	0	0	1	0	0	0	1	0	2	0	0	0	0	0	0	1	0	0	0	1	5	0	0	0	0
Otu000307	16	Bacteroidetes(100)	Flavobacteriia(100)	Flavobacteriales(100)	Flavobacteriaceae(100)	Capnocytophaga(100)			0	0	0	0	0	0	0	0	0	0	0	0	0	0	0	0	0	0	0	0	0	0	0	0	0	0	0	0	0	0	0	0	16	0	0	0	0	0	0	0
Otu000308	16	Proteobacteria(100)	Deltaproteobacteria(100)	Bdellovibrionales(100)	Bacteriovoracaceae(100)	Peredibacter(100)			0	0	0	0	0	0	0	0	0	0	0	16	0	0	0	0	0	0	0	0	0	0	0	0	0	0	0	0	0	0	0	0	0	0	0	0	0	0	0	0
Otu000309	16	Actinobacteria(100)	Actinobacteria(100)	Coriobacteriales(100)	Coriobacteriaceae(100)	Atopobium(100)			0	0	0	0	0	0	0	0	0	0	0	0	0	0	0	0	0	0	0	0	0	2	0	0	0	0	0	0	0	0	14	0	0	0	0	0	0	0	0	0
Otu000310	16	Firmicutes(100)	Bacilli(100)	Bacillales(100)	Bacillaceae_1(100)	Bacillus(100)			0	0	0	0	0	0	0	0	0	0	0	0	0	0	0	0	0	0	0	0	0	0	0	0	0	0	0	16	0	0	0	0	0	0	0	0	0	0	0	0
Otu000311	16	Bacteroidetes(100)	Sphingobacteriia(100)	Sphingobacteriales(100)	Chitinophagaceae(100)	unclassified(100)			0	0	0	0	0	0	0	0	0	0	0	0	0	0	0	0	0	0	0	0	0	0	0	0	0	0	0	0	0	0	0	0	0	0	16	0	0	0	0	0
Otu000312	16	Bacteroidetes(100)	unclassified(100)	unclassified(100)	unclassified(100)	unclassified(100)			0	0	0	0	0	0	0	0	0	16	0	0	0	0	0	0	0	0	0	0	0	0	0	0	0	0	0	0	0	0	0	0	0	0	0	0	0	0	0	0
Otu000313	16	Firmicutes(100)	Bacilli(100)	Lactobacillales(100)	Streptococcaceae(94)	Streptococcus(94)			0	0	0	0	0	0	0	0	1	0	1	0	0	0	0	1	0	0	0	1	0	0	1	0	0	1	1	1	2	0	1	0	0	0	2	0	0	0	2	1
Otu000314	15	Proteobacteria(100)	Deltaproteobacteria(100)	Bdellovibrionales(100)	Bacteriovoracaceae(100)	Peredibacter(100)			0	0	0	0	0	0	0	0	0	0	0	15	0	0	0	0	0	0	0	0	0	0	0	0	0	0	0	0	0	0	0	0	0	0	0	0	0	0	0	0
Otu000315	15	Firmicutes(100)	Bacilli(100)	Bacillales(100)	unclassified(94)	unclassified(94)			0	0	0	0	0	0	0	0	4	0	0	0	0	0	0	0	0	0	0	0	0	1	3	0	5	0	0	0	0	0	0	0	1	1	0	0	0	0	0	0
Otu000316	15	Firmicutes(100)	Bacilli(100)	unclassified(100)	unclassified(100)	unclassified(100)			0	0	0	0	0	0	0	0	1	0	0	0	0	0	0	0	1	0	1	3	0	0	4	0	1	0	0	0	0	0	0	2	0	0	1	0	0	0	0	1
Otu000317	15	Proteobacteria(100)	Gammaproteobacteria(100)	Pseudomonadales(100)	Pseudomonadaceae(100)	Pseudomonas(94)			0	0	0	0	0	0	0	0	0	0	0	0	0	0	0	0	0	0	0	0	0	0	0	0	0	0	0	0	0	0	0	0	0	0	0	15	0	0	0	0
Otu000318	15	Firmicutes(100)	Clostridia(100)	Clostridiales(100)	Lachnospiraceae(100)	Stomatobaculum(100)			0	0	0	0	0	0	0	0	0	0	0	0	0	0	0	0	0	0	0	0	0	0	0	0	0	0	0	0	0	0	0	0	0	0	15	0	0	0	0	0
Otu000319	15	Candidatus_Saccharibacteria(100)	unclassified(100)	unclassified(100)	unclassified(100)	unclassified(100)			0	0	0	0	0	0	0	0	0	0	0	0	0	0	0	0	0	0	0	15	0	0	0	0	0	0	0	0	0	0	0	0	0	0	0	0	0	0	0	0
Otu000320	14	Proteobacteria(100)	Alphaproteobacteria(100)	Sphingomonadales(100)	Sphingomonadaceae(100)	Novosphingobium(100)			0	0	0	0	0	0	0	0	0	0	0	0	0	0	0	0	0	0	0	0	0	0	0	0	0	0	0	0	0	0	0	0	0	14	0	0	0	0	0	0
Otu000321	14	Firmicutes(100)	Bacilli(100)	Lactobacillales(100)	Streptococcaceae(100)	Streptococcus(100)			0	0	0	0	0	0	0	0	0	0	0	0	0	0	7	1	0	2	0	0	0	1	0	0	0	0	0	0	0	0	1	0	0	0	1	1	0	0	0	0
Otu000322	14	Firmicutes(100)	Bacilli(100)	Lactobacillales(100)	Aerococcaceae(100)	Abiotrophia(100)			0	0	0	0	0	0	0	0	0	0	0	0	0	0	0	14	0	0	0	0	0	0	0	0	0	0	0	0	0	0	0	0	0	0	0	0	0	0	0	0
Otu000323	14	Proteobacteria(100)	Alphaproteobacteria(100)	unclassified(100)	unclassified(100)	unclassified(100)			0	0	0	0	0	0	0	0	0	0	0	0	0	0	0	0	0	0	0	0	0	0	0	0	0	0	0	0	0	0	0	0	0	0	0	14	0	0	0	0
Otu000324	14	Bacteroidetes(100)	Sphingobacteriia(100)	Sphingobacteriales(100)	Chitinophagaceae(100)	unclassified(100)			0	0	0	0	0	0	0	0	0	0	0	0	0	0	0	0	0	0	0	0	0	0	0	0	0	0	0	0	0	0	0	0	0	0	0	0	0	0	0	0
Otu000325	13	Proteobacteria(100)	Gammaproteobacteria(100)	Pseudomonadales(100)	Moraxellaceae(100)	Acinetobacter(100)			0	0	0	0	0	0	0	0	0	0	0	0	0	0	0	0	0	0	0	0	0	0	0	0	0	0	0	0	0	13	0	0	0	0	0	0	0	0	0	0
Otu000326	13	Firmicutes(100)	Bacilli(100)	Lactobacillales(100)	Streptococcaceae(100)	Streptococcus(100)			0	0	0	0	0	0	0	0	0	0	0	0	0	0	0	0	0	0	0	0	0	0	0	0	0	0	0	0	0	0	0	0	0	0	0	13	0	0	0	0
Otu000327	13	Firmicutes(100)	Clostridia(100)	Clostridiales(100)	Lachnospiraceae(100)	Coprococcus(100)			0	0	0	0	0	0	0	0	0	0	0	0	0	0	0	0	0	0	0	0	0	0	0	0	0	0	0	0	0	0	0	0	0	0	13	0	0	0	0	0
Otu000328	13	Bacteroidetes(100)	Bacteroidia(100)	Bacteroidales(100)	Porphyromonadaceae(100)	Porphyromonas(100)			0	0	0	0	0	0	0	0	0	0	0	0	0	0	0	0	0	0	0	0	0	13	0	0	0	0	0	0	0	0	0	0	0	0	0	0	0	0	0	0
Otu000329	13	Proteobacteria(100)	Alphaproteobacteria(100)	Caulobacterales(100)	Caulobacteraceae(100)	Caulobacter(100)			0	0	0	0	0	0	0	0	0	13	0	0	0	0	0	0	0	0	0	0	0	0	0	0	0	0	0	0	0	0	0	0	0	0	0	0	0	0	0	0
Otu000330	13	Proteobacteria(100)	Alphaproteobacteria(100)	Rhizobiales(100)	unclassified(100)	unclassified(100)			0	0	0	0	0	0	0	0	0	0	0	0	0	0	0	0	0	0	0	0	0	0	0	0	0	0	0	0	0	0	0	0	13	0	0	0	0	0	0	0
Otu000331	13	Armatimonadetes(100)	Armatimonadetes_gp5(100)	unclassified(100)	unclassified(100)	unclassified(100)			0	0	0	0	0	0	0	0	0	0	0	0	0	0	0	0	0	0	0	0	0	0	0	13	0	0	0	0	0	0	0	0	0	0	0	0	0	0	0	0
Otu000332	13	Bacteroidetes(100)	Bacteroidia(100)	Bacteroidales(100)	Porphyromonadaceae(100)	Porphyromonas(100)			0	0	0	0	0	0	0	0	0	0	0	0	0	0	0	0	0	0	0	0	0	0	0	0	13	0	0	0	0	0	0	0	0	0	0	0	0	0	0	0
Otu000333	12	Proteobacteria(100)	Gammaproteobacteria(100)	Xanthomonadales(100)	Xanthomonadaceae(100)	Stenotrophomonas(100)			0	0	0	0	0	0	0	0	0	0	0	0	0	0	12	0	0	0	0	0	0	0	0	0	0	0	0	0	0	0	0	0	0	0	0	0	0	0	0	0
Otu000334	12	Actinobacteria(100)	Actinobacteria(100)	Actinomycetales(100)	Nocardioidaceae(100)	Nocardioides(100)			0	0	0	0	0	0	0	0	0	0	0	0	0	0	0	0	0	11	0	0	0	0	0	0	0	1	0	0	0	0	0	0	0	0	0	0	0	0	0	0
Otu000335	12	Firmicutes(100)	Bacilli(100)	Bacillales(100)	Planococcaceae(100)	Rummeliibacillus(100)			0	0	0	0	0	0	0	0	0	0	0	0	0	0	0	12	0	0	0	0	0	0	0	0	0	0	0	0	0	0	0	0	0	0	0	0	0	0	0	0
Otu000336	12	Firmicutes(100)	Bacilli(100)	Lactobacillales(100)	Streptococcaceae(100)	Streptococcus(100)			0	0	0	0	0	0	0	0	0	3	0	0	0	0	2	1	0	0	0	0	0	1	0	1	1	0	0	0	0	0	0	0	0	0	0	3	0	0	0	0
Otu000337	12	Firmicutes(100)	Bacilli(100)	Lactobacillales(100)	Carnobacteriaceae(100)	Carnobacterium(100)			0	0	0	0	0	0	0	0	0	0	0	2	0	0	0	0	0	0	0	0	0	0	0	0	0	0	0	0	0	10	0	0	0	0	0	0	0	0	0	0
Otu000338	11	Firmicutes(100)	Clostridia(100)	Clostridiales(100)	Lachnospiraceae(100)	Oribacterium(100)			0	0	0	0	0	0	0	0	0	0	0	0	0	0	0	0	0	0	0	0	0	0	0	0	2	0	2	0	0	0	0	0	0	0	7	0	0	0	0	0
Otu000339	11	Proteobacteria(100)	Gammaproteobacteria(100)	Enterobacteriales(100)	Enterobacteriaceae(100)	unclassified(91)			0	0	0	0	0	0	0	0	0	6	0	0	0	0	0	0	0	0	0	0	0	0	0	0	0	0	0	0	0	0	0	0	0	0	0	5	0	0	0	0
Otu000340	11	Proteobacteria(100)	unclassified(100)	unclassified(100)	unclassified(100)	unclassified(100)			0	0	0	0	0	0	0	0	0	0	0	0	0	0	0	0	0	0	0	0	0	0	0	0	0	0	0	0	0	0	0	0	0	0	11	0	0	0	0	0
Otu000341	11	Firmicutes(100)	Bacilli(100)	Lactobacillales(100)	Streptococcaceae(100)	Streptococcus(100)			0	0	0	0	0	0	0	0	0	0	0	0	0	0	0	0	0	0	1	0	0	0	0	0	0	0	0	0	0	7	0	1	0	0	1	0	0	0	1	0
Otu000342	11	Firmicutes(100)	Bacilli(100)	Bacillales(100)	Staphylococcaceae(100)	Staphylococcus(100)			0	0	0	0	0	0	0	0	0	0	0	0	0	0	0	0	0	0	3	1	0	0	2	0	1	0	2	0	1	0	0	1	0	0	0	0	0	0	0	0
Otu000343	11	Firmicutes(100)	Clostridia(100)	Clostridiales(100)	Clostridiaceae_1(100)	Hathewaya(100)			0	0	0	0	0	0	0	0	0	0	0	0	0	0	0	0	0	0	0	0	0	0	0	0	0	11	0	0	0	0	0	0	0	0	0	0	0	0	0	0
Otu000344	10	Firmicutes(100)	Bacilli(100)	Lactobacillales(100)	Streptococcaceae(100)	Streptococcus(100)			0	0	0	0	0	0	0	0	0	0	0	0	0	0	0	0	0	0	0	0	0	0	0	0	0	0	0	0	0	9	0	0	0	0	0	0	0	0	1	0
Otu000345	10	Firmicutes(100)	Bacilli(100)	Lactobacillales(100)	unclassified(100)	unclassified(100)			0	0	0	0	0	0	0	0	1	0	0	0	0	0	1	0	0	0	0	1	0	1	0	0	0	0	0	1	0	0	1	2	0	0	0	0	0	0	1	1
Otu000346	10	Firmicutes(100)	Bacilli(100)	unclassified(100)	unclassified(100)	unclassified(100)			0	0	0	0	0	0	0	0	0	0	0	0	0	0	0	0	0	0	1	0	0	3	0	0	0	0	2	0	1	0	0	1	0	0	0	0	0	0	1	1
Otu000347	10	Proteobacteria(100)	Alphaproteobacteria(100)	Rhizobiales(100)	Rhizobiaceae(100)	Rhizobium(100)			0	0	0	0	0	0	0	0	0	0	0	0	0	0	0	0	0	10	0	0	0	0	0	0	0	0	0	0	0	0	0	0	0	0	0	0	0	0	0	0
Otu000348	10	Firmicutes(100)	Bacilli(100)	Bacillales(100)	Bacillaceae_1(90)	Bacillus(90)			0	0	0	0	0	0	0	0	0	0	0	4	0	0	0	0	0	0	0	0	1	0	0	0	0	0	0	0	5	0	0	0	0	0	0	0	0	0	0	0
Otu000349	10	Actinobacteria(100)	Actinobacteria(100)	Actinomycetales(100)	Pseudonocardiaceae(100)	Pseudonocardia(100)			0	0	0	0	0	0	0	0	0	0	0	0	0	0	0	0	0	0	0	0	0	0	0	0	0	10	0	0	0	0	0	0	0	0	0	0	0	0	0	0
Otu000350	10	Firmicutes(100)	Bacilli(100)	Lactobacillales(100)	Leuconostocaceae(100)	Leuconostoc(100)			0	0	0	0	0	0	0	0	0	0	0	0	0	0	0	0	0	0	0	0	0	0	0	0	8	0	0	0	0	0	0	0	0	0	0	2	0	0	0	0
Otu000351	9	Firmicutes(100)	Bacilli(100)	Lactobacillales(100)	Streptococcaceae(89)	Streptococcus(89)			0	0	0	0	0	0	0	0	0	0	0	0	0	0	0	0	0	0	1	0	0	0	4	0	0	0	0	0	3	0	0	1	0	0	0	0	0	0	0	0
Otu000352	9	Proteobacteria(100)	Betaproteobacteria(100)	Neisseriales(100)	Neisseriaceae(100)	Neisseria(89)			0	0	0	0	0	0	0	0	0	0	0	0	0	0	0	0	0	0	0	0	0	0	0	0	9	0	0	0	0	0	0	0	0	0	0	0	0	0	0	0
Otu000353	9	Firmicutes(100)	Bacilli(100)	Lactobacillales(100)	Streptococcaceae(100)	Streptococcus(100)			0	0	0	0	0	0	0	0	0	0	0	0	0	0	1	0	0	2	0	0	0	0	0	0	0	0	0	0	0	1	0	0	0	0	2	0	0	0	0	3
Otu000354	9	Firmicutes(100)	Bacilli(100)	Lactobacillales(100)	Streptococcaceae(100)	Streptococcus(100)			0	0	0	0	0	0	0	0	0	0	0	0	0	0	0	0	0	0	1	0	0	0	0	0	0	0	0	0	1	2	0	0	0	0	2	0	0	0	3	0
Otu000355	9	Proteobacteria(100)	Gammaproteobacteria(100)	Pseudomonadales(100)	Moraxellaceae(100)	Acinetobacter(100)			0	0	0	0	0	0	0	0	0	0	0	0	0	0	0	0	0	0	0	0	0	0	0	9	0	0	0	0	0	0	0	0	0	0	0	0	0	0	0	0
Otu000356	9	Proteobacteria(100)	Gammaproteobacteria(100)	Pseudomonadales(100)	Moraxellaceae(100)	Acinetobacter(100)			0	0	0	0	0	0	0	0	0	9	0	0	0	0	0	0	0	0	0	0	0	0	0	0	0	0	0	0	0	0	0	0	0	0	0	0	0	0	0	0
Otu000357	9	Firmicutes(100)	Bacilli(100)	Lactobacillales(100)	Streptococcaceae(100)	Streptococcus(100)			0	0	0	0	0	0	0	0	0	0	0	0	0	0	0	0	0	0	0	0	0	0	0	0	0	0	0	0	0	7	0	0	0	0	0	0	0	0	2	0
Otu000358	9	Firmicutes(100)	Bacilli(100)	Bacillales(100)	Bacillales_Incertae_Sedis_X(100)	Thermicanus(100)			9	0	0	0	0	0	0	0	0	0	0	0	0	0	0	0	0	0	0	0	0	0	0	0	0	0	0	0	0	0	0	0	0	0	0	0	0	0	0	0
Otu000359	9	Firmicutes(100)	Bacilli(100)	Bacillales(100)	Bacillales_Incertae_Sedis_XI(100)	Gemella(100)			0	0	0	0	0	0	0	0	3	0	0	1	0	0	0	0	0	1	0	0	0	0	2	0	0	0	0	0	1	0	0	0	0	1	0	0	0	0	0	0
Otu000360	9	Firmicutes(100)	Bacilli(100)	Lactobacillales(100)	Aerococcaceae(100)	Aerococcus(100)			0	0	0	0	0	0	0	0	0	0	0	9	0	0	0	0	0	0	0	0	0	0	0	0	0	0	0	0	0	0	0	0	0	0	0	0	0	0	0	0
Otu000361	9	Firmicutes(100)	Bacilli(100)	Lactobacillales(100)	unclassified(100)	unclassified(100)			0	0	0	0	0	0	0	0	2	0	0	0	0	0	0	0	1	0	0	0	0	0	0	0	0	0	0	1	1	0	0	0	1	0	2	1	0	0	0	0
Otu000362	9	Proteobacteria(100)	Gammaproteobacteria(100)	Pseudomonadales(100)	Pseudomonadaceae(100)	unclassified(78)			0	0	0	0	0	0	0	0	0	0	0	2	0	0	0	0	0	0	1	1	0	0	0	0	0	0	0	0	1	0	1	1	0	0	0	0	0	0	1	1
Otu000363	9	Firmicutes(100)	Bacilli(100)	unclassified(100)	unclassified(100)	unclassified(100)			0	0	0	0	0	0	0	0	0	0	0	0	0	0	0	0	0	0	0	1	0	1	3	0	0	0	0	0	1	0	0	1	2	0	0	0	0	0	0	0
Otu000364	9	Firmicutes(100)	Bacilli(100)	unclassified(100)	unclassified(100)	unclassified(100)			0	0	0	0	0	0	0	0	3	0	0	0	0	0	0	0	0	1	0	0	0	0	0	0	0	1	0	0	1	1	0	0	0	0	1	0	0	0	1	0
Otu000365	9	Firmicutes(100)	Clostridia(100)	Clostridiales(100)	Clostridiales_Incertae_Sedis_XI(100)	Anaerococcus(100)			0	0	0	0	0	0	0	0	1	0	0	0	0	0	0	0	0	0	0	0	0	0	0	0	0	0	0	0	0	0	0	0	0	0	8	0	0	0	0	0
Otu000366	8	Bacteroidetes(100)	Flavobacteriia(100)	Flavobacteriales(100)	Flavobacteriaceae(100)	Elizabethkingia(100)			0	0	0	0	0	0	0	0	0	0	0	8	0	0	0	0	0	0	0	0	0	0	0	0	0	0	0	0	0	0	0	0	0	0	0	0	0	0	0	0
Otu000367	8	Proteobacteria(100)	Gammaproteobacteria(100)	Pseudomonadales(100)	Moraxellaceae(100)	Acinetobacter(100)			0	0	0	0	0	0	0	0	0	0	0	0	0	0	0	0	0	0	0	0	0	0	0	3	0	0	0	0	0	0	0	0	0	0	2	3	0	0	0	0
Otu000368	8	Proteobacteria(100)	Alphaproteobacteria(100)	Rhizobiales(100)	Brucellaceae(63)	Pseudochrobactrum(63)			0	0	0	0	0	0	0	0	0	0	0	5	0	0	0	0	0	0	0	0	0	0	0	0	0	0	0	0	0	0	0	0	0	0	0	3	0	0	0	0
Otu000369	8	Proteobacteria(100)	Gammaproteobacteria(100)	Enterobacteriales(100)	Enterobacteriaceae(100)	unclassified(63)			0	0	0	0	0	0	0	0	0	5	0	1	0	0	0	0	0	0	0	0	0	2	0	0	0	0	0	0	0	0	0	0	0	0	0	0	0	0	0	0
Otu000370	8	Proteobacteria(100)	Gammaproteobacteria(100)	Pseudomonadales(100)	Moraxellaceae(100)	Acinetobacter(100)			0	0	0	0	0	0	0	0	0	0	0	0	0	0	1	0	0	0	0	0	0	0	0	7	0	0	0	0	0	0	0	0	0	0	0	0	0	0	0	0
Otu000371	8	Firmicutes(100)	Bacilli(100)	Lactobacillales(100)	Streptococcaceae(100)	Streptococcus(100)			0	0	0	0	0	0	0	0	0	0	0	0	0	0	0	0	0	0	0	0	0	0	0	0	0	0	0	0	0	7	0	0	0	0	0	0	0	0	1	0
Otu000372	8	Firmicutes(100)	Bacilli(100)	Lactobacillales(100)	Streptococcaceae(100)	Streptococcus(100)			0	0	0	0	0	0	0	0	0	0	0	0	0	0	0	0	0	3	0	0	0	0	0	0	0	0	0	0	0	2	0	0	0	0	2	0	0	0	0	1
Otu000373	8	Bacteroidetes(100)	Bacteroidia(100)	Bacteroidales(100)	Prevotellaceae(100)	Prevotella(100)			0	0	0	0	0	0	0	0	0	0	0	0	0	0	0	0	0	0	0	0	0	0	0	0	8	0	0	0	0	0	0	0	0	0	0	0	0	0	0	0
Otu000374	8	Proteobacteria(100)	Alphaproteobacteria(100)	Rhizobiales(100)	Hyphomicrobiaceae(100)	Devosia(100)			0	0	0	0	1	0	0	0	0	0	0	0	0	0	0	0	0	6	0	0	0	0	0	0	0	0	0	0	0	0	0	0	0	1	0	0	0	0	0	0
Otu000375	8	Firmicutes(100)	Bacilli(100)	Bacillales(100)	Bacillales_Incertae_Sedis_XI(63)	Gemella(63)			0	0	0	0	0	0	0	0	0	0	0	0	0	1	0	0	0	0	0	0	0	0	1	0	1	0	0	0	2	0	0	2	0	0	0	0	0	0	1	0
Otu000376	8	Firmicutes(100)	Bacilli(100)	Lactobacillales(100)	Streptococcaceae(100)	Streptococcus(100)			0	0	0	0	0	0	0	0	0	0	0	0	0	0	3	0	0	0	1	0	0	0	0	1	1	0	0	0	0	2	0	0	0	0	0	0	0	0	0	0
Otu000377	7	Proteobacteria(100)	Gammaproteobacteria(100)	Pseudomonadales(100)	Moraxellaceae(100)	Acinetobacter(100)			0	0	0	0	0	0	0	0	0	0	0	0	0	0	0	0	0	0	0	0	0	0	0	0	0	0	0	0	0	0	0	0	0	0	0	7	0	0	0	0
Otu000378	7	Firmicutes(100)	Negativicutes(100)	Selenomonadales(100)	Veillonellaceae(100)	Veillonella(100)			0	0	0	0	0	0	0	0	0	0	0	0	0	0	7	0	0	0	0	0	0	0	0	0	0	0	0	0	0	0	0	0	0	0	0	0	0	0	0	0
Otu000379	7	Proteobacteria(100)	Alphaproteobacteria(100)	Rhizobiales(100)	Beijerinckiaceae(100)	unclassified(100)			0	0	0	0	0	0	0	0	0	0	0	0	0	0	0	0	0	0	0	0	0	0	7	0	0	0	0	0	0	0	0	0	0	0	0	0	0	0	0	0
Otu000380	7	Firmicutes(100)	Negativicutes(100)	Selenomonadales(100)	Veillonellaceae(100)	Veillonella(100)			0	0	0	0	0	0	0	0	1	0	0	0	0	0	1	0	0	1	0	0	0	0	0	0	0	0	1	0	1	0	0	1	0	0	0	0	0	0	0	1
Otu000381	7	Proteobacteria(100)	Gammaproteobacteria(100)	Enterobacteriales(100)	Enterobacteriaceae(100)	unclassified(100)			0	0	0	0	0	0	0	0	0	7	0	0	0	0	0	0	0	0	0	0	0	0	0	0	0	0	0	0	0	0	0	0	0	0	0	0	0	0	0	0
Otu000382	7	Firmicutes(100)	Bacilli(100)	Bacillales(100)	Paenibacillaceae_1(100)	Cohnella(100)			0	0	0	0	0	0	0	0	0	0	0	0	7	0	0	0	0	0	0	0	0	0	0	0	0	0	0	0	0	0	0	0	0	0	0	0	0	0	0	0
Otu000383	7	Candidatus_Saccharibacteria(100)	unclassified(100)	unclassified(100)	unclassified(100)	unclassified(100)			0	0	0	0	0	0	0	0	0	0	0	0	0	0	0	0	0	0	0	0	0	0	0	0	0	7	0	0	0	0	0	0	0	0	0	0	0	0	0	0
Otu000384	7	Firmicutes(100)	Bacilli(100)	Bacillales(100)	Bacillaceae_1(100)	Aeribacillus(100)			0	0	0	0	0	0	0	0	0	0	0	0	0	0	0	0	0	0	0	0	0	0	0	0	0	0	0	0	7	0	0	0	0	0	0	0	0	0	0	0
Otu000385	7	Firmicutes(100)	Bacilli(100)	Bacillales(100)	Staphylococcaceae(100)	Staphylococcus(100)			0	0	0	0	0	0	0	0	0	0	0	0	0	0	0	0	0	0	0	1	0	2	0	0	0	0	0	0	1	0	0	1	0	0	0	0	0	2	0	0
Otu000386	7	Actinobacteria(100)	Actinobacteria(100)	Actinomycetales(100)	Actinomycetaceae(100)	Actinomyces(100)			0	0	0	0	0	0	0	0	0	0	0	0	0	0	0	0	0	0	0	0	0	0	5	0	0	0	0	0	0	0	0	0	0	0	2	0	0	0	0	0
Otu000387	7	Firmicutes(100)	Bacilli(100)	Bacillales(100)	Staphylococcaceae(100)	Staphylococcus(100)			0	0	0	0	0	0	0	0	0	0	0	0	0	0	0	0	0	0	0	0	0	0	0	0	0	3	2	1	0	0	0	0	1	0	0	0	0	0	0	0
Otu000388	7	Proteobacteria(100)	Gammaproteobacteria(100)	Pasteurellales(100)	Pasteurellaceae(100)	Aggregatibacter(100)			0	0	0	0	0	0	0	0	0	0	0	0	0	0	0	0	0	0	0	0	0	0	0	0	0	2	0	0	0	0	0	0	0	0	0	0	0	0	0	5
Otu000389	7	Actinobacteria(100)	Actinobacteria(100)	Actinomycetales(100)	Corynebacteriaceae(100)	Corynebacterium(100)			0	0	0	0	0	0	0	0	0	0	0	0	0	0	0	0	0	0	0	0	0	0	0	0	7	0	0	0	0	0	0	0	0	0	0	0	0	0	0	0
Otu000390	7	Firmicutes(100)	Erysipelotrichia(100)	Erysipelotrichales(100)	Erysipelotrichaceae(100)	Turicibacter(100)			0	0	0	0	0	0	0	0	0	0	0	0	0	0	0	0	0	0	7	0	0	0	0	0	0	0	0	0	0	0	0	0	0	0	0	0	0	0	0	0
Otu000391	7	Firmicutes(100)	Bacilli(100)	Bacillales(100)	unclassified(72)	unclassified(72)			0	0	0	0	0	0	0	0	2	0	0	0	0	0	0	0	0	0	0	0	0	0	1	0	1	0	0	0	1	0	0	0	0	1	0	0	0	0	1	0
Otu000392	7	Firmicutes(100)	Bacilli(100)	Lactobacillales(100)	Streptococcaceae(100)	Streptococcus(100)			0	0	0	0	0	0	0	0	1	0	0	1	0	0	1	0	0	0	1	0	0	0	0	0	1	0	0	0	0	2	0	0	0	0	0	0	0	0	0	0
Otu000393	7	Firmicutes(100)	Bacilli(100)	Lactobacillales(100)	Streptococcaceae(100)	Streptococcus(100)			0	0	0	0	0	0	0	0	0	0	0	1	0	0	0	0	0	0	0	0	0	0	0	0	1	0	0	0	1	2	0	0	0	0	1	0	0	0	1	0
Otu000394	7	Firmicutes(100)	Bacilli(100)	unclassified(100)	unclassified(100)	unclassified(100)			0	0	0	0	0	0	0	0	0	0	0	0	0	0	0	0	0	0	0	0	0	1	2	0	3	0	0	0	0	1	0	0	0	0	0	0	0	0	0	0
Otu000395	7	Firmicutes(100)	Bacilli(100)	Lactobacillales(100)	Streptococcaceae(100)	Streptococcus(100)			0	0	0	0	0	0	0	0	0	0	0	0	0	0	0	0	0	0	0	0	0	0	0	0	0	0	0	0	0	2	0	3	0	0	1	0	0	0	1	0
Otu000396	7	Firmicutes(100)	Bacilli(100)	Bacillales(100)	Staphylococcaceae(100)	Staphylococcus(100)			0	0	0	0	0	0	0	0	0	1	0	0	0	1	0	0	1	0	0	0	1	0	0	0	0	2	0	1	0	0	0	0	0	0	0	0	0	0	0	0
Otu000397	7	Bacteroidetes(100)	Bacteroidia(100)	Bacteroidales(100)	Prevotellaceae(100)	Prevotella(100)			0	0	0	0	0	0	0	0	0	0	0	0	0	0	0	0	0	0	0	0	0	7	0	0	0	0	0	0	0	0	0	0	0	0	0	0	0	0	0	0
Otu000398	7	Proteobacteria(100)	Gammaproteobacteria(100)	unclassified(100)	unclassified(100)	unclassified(100)			0	0	0	0	0	0	0	0	0	7	0	0	0	0	0	0	0	0	0	0	0	0	0	0	0	0	0	0	0	0	0	0	0	0	0	0	0	0	0	0
Otu000399	7	Firmicutes(100)	Bacilli(100)	Bacillales(100)	Bacillales_Incertae_Sedis_XI(58)	Gemella(58)			0	0	0	0	0	0	0	0	1	0	0	0	0	0	0	1	0	0	0	0	0	1	0	0	2	0	0	0	0	1	1	0	0	0	0	0	0	0	0	0
Otu000400	7	Gemmatimonadetes(100)	Gemmatimonadetes(100)	Gemmatimonadales(100)	Gemmatimonadaceae(100)	Gemmatimonas(100)			0	0	0	0	0	0	0	0	0	0	7	0	0	0	0	0	0	0	0	0	0	0	0	0	0	0	0	0	0	0	0	0	0	0	0	0	0	0	0	0
Otu000401	7	Proteobacteria(100)	Gammaproteobacteria(100)	Enterobacteriales(100)	Enterobacteriaceae(100)	unclassified(100)			0	0	0	0	0	0	0	0	0	7	0	0	0	0	0	0	0	0	0	0	0	0	0	0	0	0	0	0	0	0	0	0	0	0	0	0	0	0	0	0
Otu000402	7	Deinococcus-Thermus(100)	Deinococci(100)	Deinococcales(100)	Deinococcaceae(100)	Deinococcus(100)			0	0	0	0	0	0	0	0	0	0	0	0	0	0	0	0	0	0	0	0	0	0	0	0	0	0	0	0	0	0	0	0	0	0	7	0	0	0	0	0
Otu000403	7	Proteobacteria(100)	Betaproteobacteria(100)	Burkholderiales(100)	Sutterellaceae(100)	Sutterella(100)			0	0	0	0	0	0	0	0	0	0	0	0	0	0	0	0	0	0	0	0	0	0	0	0	0	0	0	0	0	0	0	0	0	0	7	0	0	0	0	0
Otu000404	6	Firmicutes(100)	Bacilli(100)	Lactobacillales(100)	Streptococcaceae(67)	unclassified(100)			0	0	0	0	0	0	0	0	0	0	0	0	0	0	0	0	0	0	0	0	0	0	3	0	0	0	0	0	0	0	0	1	1	0	0	0	0	0	1	0
Otu000405	6	Firmicutes(100)	Negativicutes(100)	Selenomonadales(100)	Veillonellaceae(100)	Veillonella(100)			0	0	0	0	0	0	0	0	1	0	0	0	0	0	3	0	0	0	0	0	0	1	1	0	0	0	0	0	0	0	0	0	0	0	0	0	0	0	0	0
Otu000406	6	Firmicutes(100)	Negativicutes(100)	Selenomonadales(100)	Veillonellaceae(100)	unclassified(84)			0	0	0	0	0	0	0	0	0	0	0	0	0	0	0	0	0	0	1	0	0	2	0	0	0	0	0	0	0	2	0	0	0	0	1	0	0	0	0	0
Otu000407	6	Proteobacteria(100)	Gammaproteobacteria(100)	Enterobacteriales(100)	Enterobacteriaceae(100)	unclassified(100)			0	0	0	0	0	0	0	0	0	4	0	0	0	0	0	0	0	0	0	1	0	0	0	0	0	0	0	0	0	0	0	0	0	0	0	1	0	0	0	0
Otu000408	6	Firmicutes(100)	Bacilli(100)	Lactobacillales(100)	Streptococcaceae(100)	Streptococcus(100)			0	0	0	0	0	0	0	0	0	0	0	0	0	0	0	0	0	0	2	0	0	0	0	0	0	0	0	0	0	4	0	0	0	0	0	0	0	0	0	0
Otu000409	6	Firmicutes(100)	Bacilli(100)	unclassified(100)	unclassified(100)	unclassified(100)			0	0	0	0	0	0	0	0	1	0	0	1	0	0	0	1	0	0	0	0	0	0	2	0	0	0	0	0	1	0	0	0	0	0	0	0	0	0	0	0
Otu000410	6	Bacteroidetes(100)	Flavobacteriia(100)	Flavobacteriales(100)	Flavobacteriaceae(100)	Capnocytophaga(100)			0	0	0	0	0	0	0	0	0	0	0	0	0	0	0	0	0	0	0	0	0	0	0	0	0	0	0	0	0	0	0	0	0	0	6	0	0	0	0	0
Otu000411	6	Firmicutes(100)	Clostridia(100)	Clostridiales(100)	Ruminococcaceae(100)	unclassified(100)			0	0	0	0	0	0	0	0	0	0	0	0	0	0	0	0	0	0	0	0	0	0	0	0	0	0	0	0	0	6	0	0	0	0	0	0	0	0	0	0
Otu000412	6	Firmicutes(100)	Bacilli(100)	unclassified(100)	unclassified(100)	unclassified(100)			0	0	0	0	0	0	0	0	0	0	0	0	0	0	0	0	0	0	0	0	0	1	0	0	2	1	0	0	1	1	0	0	0	0	0	0	0	0	0	0
Otu000413	6	Actinobacteria(100)	Actinobacteria(100)	Actinomycetales(100)	Actinomycetaceae(100)	Actinomyces(100)			0	0	0	0	0	0	0	0	0	0	0	0	0	0	0	0	0	0	0	0	0	0	4	0	0	0	0	0	0	0	0	0	0	0	2	0	0	0	0	0
Otu000414	6	Actinobacteria(100)	Actinobacteria(100)	Actinomycetales(100)	unclassified(100)	unclassified(100)			0	0	0	0	0	0	0	0	0	0	0	0	0	0	4	0	0	0	0	0	0	0	0	0	0	0	0	0	0	1	0	0	0	0	1	0	0	0	0	0
Otu000415	6	Firmicutes(100)	Bacilli(100)	Lactobacillales(100)	Streptococcaceae(100)	Streptococcus(100)			0	0	0	0	0	0	0	0	0	0	0	0	0	0	0	0	0	0	1	0	0	0	0	0	0	0	0	0	0	2	0	0	0	0	0	0	0	0	3	0
Otu000416	6	Firmicutes(100)	Bacilli(100)	Lactobacillales(100)	Streptococcaceae(100)	Streptococcus(100)			0	0	0	0	0	0	0	0	1	0	0	0	0	0	1	0	0	1	0	0	0	0	0	0	0	0	0	0	1	0	0	0	0	0	1	0	0	0	0	1
Otu000417	6	Firmicutes(100)	Bacilli(100)	Lactobacillales(100)	Streptococcaceae(100)	Streptococcus(100)			0	0	0	0	0	0	0	0	0	0	0	0	0	0	0	0	0	1	0	0	0	0	0	0	0	0	0	0	0	0	0	0	0	0	3	0	0	0	0	2
Otu000418	6	Actinobacteria(100)	Actinobacteria(100)	Actinomycetales(100)	Propionibacteriaceae(100)	unclassified(100)			0	6	0	0	0	0	0	0	0	0	0	0	0	0	0	0	0	0	0	0	0	0	0	0	0	0	0	0	0	0	0	0	0	0	0	0	0	0	0	0
Otu000419	6	Proteobacteria(100)	Gammaproteobacteria(100)	Enterobacteriales(100)	Enterobacteriaceae(100)	Klebsiella(67)			0	0	0	0	0	0	0	0	0	3	0	0	0	0	0	0	0	0	0	0	0	0	0	0	0	0	0	0	0	0	0	0	0	0	0	3	0	0	0	0
Otu000420	6	Proteobacteria(100)	Alphaproteobacteria(100)	Rhizobiales(100)	Xanthobacteraceae(100)	Ancylobacter(100)			0	0	0	0	0	0	0	0	0	0	0	0	0	0	0	0	0	0	0	0	0	0	0	0	0	0	0	0	0	0	0	0	0	0	0	6	0	0	0	0
Otu000421	6	Proteobacteria(100)	Gammaproteobacteria(100)	Cardiobacteriales(100)	Cardiobacteriaceae(100)	Cardiobacterium(100)			0	0	0	0	0	0	0	0	0	0	0	0	0	0	0	6	0	0	0	0	0	0	0	0	0	0	0	0	0	0	0	0	0	0	0	0	0	0	0	0
Otu000422	6	Proteobacteria(100)	Gammaproteobacteria(100)	Pseudomonadales(100)	Moraxellaceae(100)	Acinetobacter(84)			0	0	0	0	0	0	0	0	0	0	0	0	0	1	0	0	0	0	0	0	0	0	0	1	0	0	0	2	0	0	0	0	0	0	0	2	0	0	0	0
Otu000423	6	Proteobacteria(100)	Gammaproteobacteria(100)	Pseudomonadales(100)	Pseudomonadaceae(100)	unclassified(100)			0	0	0	0	0	0	0	0	0	0	0	0	0	0	0	0	1	0	0	0	0	0	0	1	0	0	0	1	0	0	0	0	0	1	0	0	0	0	2	0
Otu000424	6	unclassified(100)	unclassified(100)	unclassified(100)	unclassified(100)	unclassified(100)			0	0	0	0	0	0	0	0	0	0	0	0	0	0	0	0	0	0	0	0	6	0	0	0	0	0	0	0	0	0	0	0	0	0	0	0	0	0	0	0
Otu000425	6	Proteobacteria(100)	Gammaproteobacteria(100)	Pseudomonadales(100)	Moraxellaceae(100)	Acinetobacter(100)			0	0	0	0	0	0	0	0	0	1	0	0	0	0	0	0	0	0	0	0	0	0	0	0	0	0	0	0	0	0	0	0	0	0	0	5	0	0	0	0
Otu000426	6	Deinococcus-Thermus(100)	Deinococci(100)	Deinococcales(100)	Deinococcaceae(100)	Deinococcus(100)			0	0	0	0	0	0	0	0	0	0	0	6	0	0	0	0	0	0	0	0	0	0	0	0	0	0	0	0	0	0	0	0	0	0	0	0	0	0	0	0
Otu000427	6	Actinobacteria(100)	Actinobacteria(100)	Actinomycetales(100)	Propionibacteriaceae(100)	Propionibacterium(100)			0	0	0	0	0	0	0	0	0	0	2	0	0	0	0	0	0	0	1	0	0	1	0	0	0	0	1	0	0	0	0	1	0	0	0	0	0	0	0	0
Otu000428	5	Actinobacteria(100)	Actinobacteria(100)	Actinomycetales(100)	Corynebacteriaceae(100)	Corynebacterium(100)			0	0	0	0	0	0	0	0	0	0	0	0	0	0	0	0	0	5	0	0	0	0	0	0	0	0	0	0	0	0	0	0	0	0	0	0	0	0	0	0
Otu000429	5	Actinobacteria(100)	Actinobacteria(100)	Actinomycetales(100)	Microbacteriaceae(100)	Leucobacter(61)			0	0	0	0	0	0	0	0	2	0	0	0	0	0	0	0	0	0	0	0	0	0	0	0	0	0	0	0	0	0	0	0	0	0	0	0	0	0	0	0
Otu000430	5	Proteobacteria(100)	Gammaproteobacteria(100)	Pseudomonadales(100)	Moraxellaceae(100)	Acinetobacter(100)			0	0	0	0	0	0	0	0	0	0	0	0	0	0	0	0	0	0	0	0	0	0	0	3	0	0	0	0	0	0	0	0	0	0	2	0	0	0	0	0
Otu000431	5	Actinobacteria(100)	Actinobacteria(100)	Actinomycetales(100)	unclassified(80)	unclassified(80)			0	0	0	0	0	0	0	0	0	0	0	0	0	0	0	0	0	0	0	0	0	0	0	0	3	1	0	0	0	0	0	0	1	0	0	0	0	0	0	0
Otu000432	5	Firmicutes(100)	Bacilli(100)	Lactobacillales(100)	unclassified(100)	unclassified(100)			0	0	0	0	0	0	0	0	1	0	0	0	0	0	0	0	0	0	0	0	0	2	2	0	0	0	0	0	0	0	0	0	0	0	0	0	0	0	0	0
Otu000433	5	Firmicutes(100)	Bacilli(100)	unclassified(100)	unclassified(100)	unclassified(100)			0	0	0	0	0	0	0	0	1	0	0	1	0	0	0	0	0	0	0	0	0	0	0	0	0	0	0	0	0	1	1	0	0	0	0	0	0	0	1	0
Otu000434	5	Firmicutes(100)	Clostridia(100)	Clostridiales(100)	Clostridiales_Incertae_Sedis_XI(100)	Ezakiella(100)			0	0	0	0	0	0	0	0	0	0	0	0	0	0	0	0	0	0	5	0	0	0	0	0	0	0	0	0	0	0	0	0	0	0	0	0	0	0	0	0
Otu000435	5	Firmicutes(100)	Bacilli(100)	Lactobacillales(100)	Streptococcaceae(100)	Streptococcus(100)			0	0	0	0	0	0	0	0	0	0	0	1	0	0	0	0	0	0	0	0	0	0	0	0	1	0	0	0	1	1	1	0	0	0	0	0	0	0	0	0
Otu000436	5	Firmicutes(100)	Bacilli(100)	Lactobacillales(100)	Streptococcaceae(100)	Streptococcus(100)			0	0	0	0	0	0	0	0	0	0	0	0	0	0	0	0	0	0	0	0	0	0	0	0	0	0	0	0	0	0	0	0	0	0	3	0	0	0	0	2
Otu000437	5	Firmicutes(100)	Bacilli(100)	Lactobacillales(100)	Streptococcaceae(100)	Streptococcus(80)			0	0	0	0	0	0	0	0	0	0	0	2	0	0	0	1	0	1	0	0	0	0	0	0	0	0	0	0	1	0	0	0	0	0	0	0	0	0	0	0
Otu000438	5	Proteobacteria(100)	Deltaproteobacteria(100)	Bdellovibrionales(100)	Bdellovibrionaceae(100)	Bdellovibrio(100)			0	0	0	0	0	0	0	0	0	5	0	0	0	0	0	0	0	0	0	0	0	0	0	0	0	0	0	0	0	0	0	0	0	0	0	0	0	0	0	0
Otu000439	5	Firmicutes(100)	Bacilli(100)	Lactobacillales(100)	unclassified(100)	unclassified(100)			0	0	0	0	0	0	0	0	0	0	0	0	0	0	0	0	0	4	0	0	0	0	0	0	0	0	0	0	1	0	0	0	0	0	0	0	0	0	0	0
Otu000440	5	Firmicutes(100)	Bacilli(100)	Lactobacillales(100)	Streptococcaceae(100)	Streptococcus(100)			0	0	0	0	0	0	0	0	0	0	0	0	0	0	0	0	0	0	0	0	0	0	0	0	0	0	0	0	0	0	0	0	0	0	5	0	0	0	0	0
Otu000441	5	Firmicutes(100)	Bacilli(100)	Lactobacillales(100)	unclassified(100)	unclassified(100)			0	0	0	0	0	0	0	0	0	0	0	0	0	0	0	0	0	0	0	0	0	0	0	0	0	0	5	0	0	0	0	0	0	0	0	0	0	0	0	0
Otu000442	5	Proteobacteria(100)	Gammaproteobacteria(100)	Xanthomonadales(100)	Xanthomonadaceae(100)	unclassified(100)			0	0	0	0	0	0	0	0	0	0	0	0	0	0	5	0	0	0	0	0	0	0	0	0	0	0	0	0	0	0	0	0	0	0	0	0	0	0	0	0
Otu000443	5	Firmicutes(100)	Erysipelotrichia(100)	Erysipelotrichales(100)	Erysipelotrichaceae(100)	Holdemanella(100)			0	0	0	0	0	0	0	0	0	0	0	0	0	0	0	0	0	0	0	0	0	0	0	0	0	0	0	0	0	0	0	0	0	0	5	0	0	0	0	0
Otu000444	5	unclassified(100)	unclassified(100)	unclassified(100)	unclassified(100)	unclassified(100)			0	0	0	1	0	0	0	0	0	0	0	0	0	0	0	0	0	0	0	0	0	0	0	0	0	1	0	0	0	0	0	0	0	1	0	0	0	0	0	0
Otu000445	5	Proteobacteria(100)	Alphaproteobacteria(100)	unclassified(100)	unclassified(100)	unclassified(100)			0	0	0	0	0	0	0	0	0	0	0	0	0	0	0	0	0	0	0	0	0	5	0	0	0	0	0	0	0	0	0	0	0	0	0	0	0	0	0	0
Otu000446	5	Proteobacteria(100)	Betaproteobacteria(100)	Burkholderiales(100)	Comamonadaceae(100)	unclassified(61)			0	0	0	0	0	0	0	0	0	0	0	0	0	0	0	0	0	0	0	0	0	0	0	0	0	0	0	0	0	0	0	0	0	0	0	5	0	0	0	0
Otu000447	5	unclassified(100)	unclassified(100)	unclassified(100)	unclassified(100)	unclassified(100)			0	0	0	0	0	0	0	0	0	0	0	0	0	0	0	0	0	0	0	0	0	0	0	0	0	5	0	0	0	0	0	0	0	0	0	0	0	0	0	0
Otu000448	5	Proteobacteria(100)	Gammaproteobacteria(100)	Pseudomonadales(100)	Moraxellaceae(100)	Acinetobacter(100)			0	0	0	0	0	0	0	0	0	1	0	0	0	0	0	0	0	0	0	0	0	0	0	3	0	0	0	0	0	0	0	0	0	0	0	1	0	0	0	0
Otu000449	5	Proteobacteria(100)	Gammaproteobacteria(100)	Pseudomonadales(100)	Moraxellaceae(100)	Acinetobacter(80)			0	0	0	0	0	0	0	0	0	0	0	0	0	0	0	0	0	0	0	0	5	0	0	0	0	0	0	0	0	0	0	0	0	0	0	0	0	0	0	0
Otu000450	5	Actinobacteria(100)	Actinobacteria(100)	Actinomycetales(100)	Micrococcaceae(100)	Rothia(100)			0	0	0	0	0	0	0	0	0	0	0	0	0	0	0	0	0	0	0	1	0	1	0	0	0	0	0	0	0	2	0	0	0	0	1	0	0	0	0	0
Otu000451	5	Firmicutes(100)	Clostridia(100)	Clostridiales(100)	Lachnospiraceae(100)	Roseburia(100)			0	0	0	0	0	0	0	0	0	0	0	0	0	2	0	0	0	0	0	0	0	2	0	0	0	0	0	0	0	0	0	0	0	0	1	0	0	0	0	0
Otu000452	5	Actinobacteria(100)	Actinobacteria(100)	Actinomycetales(100)	Actinomycetaceae(100)	Actinomyces(100)			0	0	0	0	0	0	0	0	0	0	0	0	0	0	0	0	0	0	0	0	0	0	0	0	0	0	0	0	0	0	0	0	0	0	5	0	0	0	0	0
Otu000453	5	Firmicutes(100)	Bacilli(100)	Bacillales(100)	Bacillales_Incertae_Sedis_XI(80)	Gemella(80)			0	0	0	0	0	0	0	0	0	0	0	0	0	0	0	0	0	0	0	0	0	0	0	0	3	0	0	0	0	1	0	0	0	0	0	0	0	0	1	0
Otu000454	5	Firmicutes(100)	Clostridia(100)	Clostridiales(100)	Clostridiales_Incertae_Sedis_XI(100)	Anaerococcus(100)			0	0	0	0	0	0	0	0	0	0	0	0	0	0	0	0	5	0	0	0	0	0	0	0	0	0	0	0	0	0	0	0	0	0	0	0	0	0	0	0
Otu000455	5	Actinobacteria(100)	Actinobacteria(100)	Actinomycetales(100)	Actinomycetaceae(100)	Actinomyces(100)			0	0	0	0	0	0	0	0	0	0	0	0	0	0	0	0	0	0	0	0	0	0	2	0	0	0	0	0	0	0	0	0	0	0	3	0	0	0	0	0
Otu000456	5	Firmicutes(100)	Bacilli(100)	Bacillales(100)	Bacillales_Incertae_Sedis_XI(80)	Gemella(80)			0	0	0	0	0	0	0	0	0	0	0	0	0	0	0	0	0	0	0	0	0	0	2	0	0	0	0	0	1	2	0	0	0	0	0	0	0	0	0	0
Otu000457	4	Actinobacteria(100)	Actinobacteria(100)	Actinomycetales(100)	unclassified(100)	unclassified(100)			0	0	0	0	0	0	0	0	0	0	0	0	0	0	0	0	0	0	1	0	0	0	1	0	0	0	1	0	0	0	0	1	0	0	0	0	0	0	0	0
Otu000458	4	Actinobacteria(100)	Actinobacteria(100)	Actinomycetales(100)	Propionibacteriaceae(100)	Propionibacterium(100)			0	0	0	0	0	0	0	0	0	0	0	0	0	0	0	0	0	0	0	0	0	0	0	2	0	0	0	0	0	0	0	0	0	0	1	0	0	0	1	0
Otu000459	4	Actinobacteria(100)	Actinobacteria(100)	Actinomycetales(100)	Actinomycetaceae(100)	Actinomyces(100)			0	0	0	0	0	0	0	0	0	0	0	0	0	0	0	0	0	0	0	0	0	0	4	0	0	0	0	0	0	0	0	0	0	0	0	0	0	0	0	0
Otu000460	4	Actinobacteria(100)	Actinobacteria(100)	Acidimicrobiales(100)	unclassified(100)	unclassified(100)			0	0	0	0	0	0	0	0	0	0	0	4	0	0	0	0	0	0	0	0	0	0	0	0	0	0	0	0	0	0	0	0	0	0	0	0	0	0	0	0
Otu000461	4	Actinobacteria(100)	Actinobacteria(100)	Actinomycetales(100)	unclassified(75)	unclassified(75)			0	0	0	0	0	0	0	0	0	0	0	0	0	0	0	0	0	0	0	0	0	0	1	0	0	0	0	0	0	0	0	2	0	0	0	0	0	0	0	1
Otu000462	4	Firmicutes(100)	Negativicutes(100)	Selenomonadales(100)	Veillonellaceae(100)	unclassified(75)			0	0	0	0	0	0	0	0	0	0	0	0	0	0	0	0	0	0	1	0	0	0	0	0	0	0	0	0	1	1	0	0	1	0	0	0	0	0	0	0
Otu000463	4	Actinobacteria(100)	Actinobacteria(100)	Actinomycetales(100)	Corynebacteriaceae(100)	Corynebacterium(100)			0	0	0	0	0	0	0	0	0	0	0	0	0	0	0	0	0	0	0	0	0	0	0	0	0	0	0	0	0	0	0	0	0	0	4	0	0	0	0	0
Otu000464	4	Firmicutes(100)	Negativicutes(100)	Selenomonadales(100)	Veillonellaceae(100)	Veillonella(100)			0	0	0	0	0	0	0	0	0	0	0	0	0	0	2	0	0	0	0	0	0	0	0	0	0	0	0	0	0	0	0	1	0	0	1	0	0	0	0	0
Otu000465	4	Proteobacteria(100)	Gammaproteobacteria(100)	Xanthomonadales(100)	Xanthomonadaceae(100)	Stenotrophomonas(100)			0	0	0	0	0	0	0	0	0	4	0	0	0	0	0	0	0	0	0	0	0	0	0	0	0	0	0	0	0	0	0	0	0	0	0	0	0	0	0	0
Otu000466	4	Bacteroidetes(100)	Sphingobacteriia(100)	Sphingobacteriales(100)	Chitinophagaceae(100)	unclassified(100)			0	0	0	0	0	0	0	0	0	0	0	0	0	0	0	0	0	0	0	0	0	0	0	0	0	0	0	0	0	0	0	0	0	0	0	0	0	0	0	4
Otu000467	4	Proteobacteria(100)	Gammaproteobacteria(100)	Xanthomonadales(100)	Xanthomonadaceae(100)	unclassified(100)			0	0	0	0	0	0	0	0	0	0	0	0	0	0	4	0	0	0	0	0	0	0	0	0	0	0	0	0	0	0	0	0	0	0	0	0	0	0	0	0
Otu000468	4	Proteobacteria(100)	Alphaproteobacteria(100)	Sphingomonadales(100)	Sphingomonadaceae(100)	unclassified(75)			0	0	0	0	0	0	0	0	0	1	0	0	0	0	0	0	0	0	0	0	0	3	0	0	0	0	0	0	0	0	0	0	0	0	0	0	0	0	0	0
Otu000469	4	Proteobacteria(100)	Alphaproteobacteria(100)	Rhizobiales(100)	Hyphomicrobiaceae(100)	Hyphomicrobium(100)			0	0	0	0	0	0	0	0	0	0	0	0	0	0	0	0	0	0	0	0	0	0	0	0	0	0	0	0	0	0	0	0	0	0	4	0	0	0	0	0
Otu000470	4	unclassified(100)	unclassified(100)	unclassified(100)	unclassified(100)	unclassified(100)			0	0	0	0	0	0	0	0	0	0	0	0	0	0	0	0	0	0	0	0	4	0	0	0	0	0	0	0	0	0	0	0	0	0	0	0	0	0	0	0
Otu000471	4	Firmicutes(100)	Bacilli(100)	Bacillales(100)	unclassified(100)	unclassified(100)			0	0	0	0	0	0	0	0	0	0	0	0	0	0	0	0	0	0	0	0	0	0	1	0	0	0	0	0	0	0	0	1	0	1	1	0	0	0	0	0
Otu000472	4	Proteobacteria(100)	Gammaproteobacteria(100)	Pseudomonadales(100)	Moraxellaceae(100)	Acinetobacter(100)			0	0	0	0	0	0	0	0	0	0	0	0	0	0	0	0	0	0	0	0	0	0	0	4	0	0	0	0	0	0	0	0	0	0	0	0	0	0	0	0
Otu000473	4	Proteobacteria(100)	Gammaproteobacteria(100)	Pseudomonadales(100)	Moraxellaceae(100)	Acinetobacter(100)			0	0	0	0	0	0	0	0	0	0	0	0	0	0	0	0	0	0	0	0	0	0	0	1	0	0	0	0	0	0	0	0	0	0	0	3	0	0	0	0
Otu000474	4	Proteobacteria(100)	Gammaproteobacteria(100)	Pseudomonadales(100)	Moraxellaceae(100)	Acinetobacter(100)			0	0	0	0	0	0	0	0	0	0	0	0	0	0	0	0	0	0	0	0	0	0	0	3	0	0	0	0	0	0	0	0	0	0	0	1	0	0	0	0
Otu000475	4	Proteobacteria(100)	Gammaproteobacteria(100)	Pseudomonadales(100)	Moraxellaceae(100)	Acinetobacter(100)			0	0	0	0	0	0	0	0	0	0	0	0	0	0	0	0	0	0	0	0	0	0	0	2	0	0	0	0	0	0	0	0	0	0	0	2	0	0	0	0
Otu000476	4	Proteobacteria(100)	Gammaproteobacteria(100)	Pseudomonadales(100)	Moraxellaceae(100)	Acinetobacter(100)			0	0	0	0	0	0	0	0	0	0	0	0	0	0	0	0	0	0	0	0	0	0	0	2	0	0	0	0	0	0	0	0	0	0	1	1	0	0	0	0
Otu000477	4	Firmicutes(100)	Bacilli(100)	Lactobacillales(100)	Streptococcaceae(100)	Streptococcus(100)			0	0	0	0	0	0	0	0	0	0	0	0	0	0	0	0	0	1	0	0	0	0	0	0	1	0	0	0	0	0	0	0	0	0	2	0	0	0	0	0
Otu000478	4	Proteobacteria(100)	Gammaproteobacteria(100)	Pseudomonadales(100)	Moraxellaceae(100)	Acinetobacter(100)			0	0	0	0	0	0	0	0	0	0	0	0	0	0	0	0	0	0	0	0	0	0	0	4	0	0	0	0	0	0	0	0	0	0	0	0	0	0	0	0
Otu000479	4	Firmicutes(100)	Bacilli(100)	Bacillales(100)	Planococcaceae(100)	Lysinibacillus(100)			0	0	0	0	0	0	0	0	0	0	0	0	0	0	0	0	0	0	0	0	0	0	0	0	0	0	0	0	0	0	0	0	0	0	0	4	0	0	0	0
Otu000480	4	unclassified(100)	unclassified(100)	unclassified(100)	unclassified(100)	unclassified(100)			0	0	0	0	0	0	0	0	0	0	0	0	0	0	0	0	0	0	0	0	4	0	0	0	0	0	0	0	0	0	0	0	0	0	0	0	0	0	0	0
Otu000481	4	Firmicutes(100)	Bacilli(100)	Lactobacillales(100)	Streptococcaceae(100)	Streptococcus(100)			0	0	0	0	0	0	0	0	0	0	0	0	0	0	0	0	0	0	0	0	0	0	0	0	0	0	0	0	0	3	0	0	0	0	0	0	0	0	1	0
Otu000482	4	Firmicutes(100)	Bacilli(100)	Bacillales(100)	Staphylococcaceae(100)	Staphylococcus(100)			0	0	0	0	0	0	0	0	0	0	0	0	0	0	0	0	0	0	0	0	0	0	0	0	1	0	1	0	2	0	0	0	0	0	0	0	0	0	0	0
Otu000483	4	Proteobacteria(100)	Betaproteobacteria(100)	Burkholderiales(100)	unclassified(100)	unclassified(100)			0	0	0	0	0	0	0	0	0	4	0	0	0	0	0	0	0	0	0	0	0	0	0	0	0	0	0	0	0	0	0	0	0	0	0	0	0	0	0	0
Otu000484	4	Proteobacteria(100)	Deltaproteobacteria(100)	Bdellovibrionales(100)	Bacteriovoracaceae(100)	Bacteriovorax(100)			0	0	0	0	0	0	0	0	0	4	0	0	0	0	0	0	0	0	0	0	0	0	0	0	0	0	0	0	0	0	0	0	0	0	0	0	0	0	0	0
Otu000485	4	unclassified(100)	unclassified(100)	unclassified(100)	unclassified(100)	unclassified(100)			0	0	0	0	0	0	0	0	0	0	0	0	0	0	4	0	0	0	0	0	0	0	0	0	0	0	0	0	0	0	0	0	0	0	0	0	0	0	0	0
Otu000486	4	unclassified(100)	unclassified(100)	unclassified(100)	unclassified(100)	unclassified(100)			0	0	0	0	0	0	0	0	0	0	0	0	0	0	0	0	0	0	0	0	0	0	0	3	0	0	0	0	0	0	0	0	0	0	0	1	0	0	0	0
Otu000487	4	unclassified(100)	unclassified(100)	unclassified(100)	unclassified(100)	unclassified(100)			0	0	0	0	0	0	0	0	0	0	0	0	0	0	1	0	0	0	1	0	0	0	0	0	1	0	0	0	0	0	0	0	0	0	1	0	0	0	0	0
Otu000488	4	Proteobacteria(100)	Gammaproteobacteria(100)	unclassified(100)	unclassified(100)	unclassified(100)			0	0	0	0	0	0	0	0	0	0	0	0	0	0	1	0	0	0	0	0	0	0	0	0	0	0	0	0	0	0	0	0	0	0	0	3	0	0	0	0
Otu000489	4	Firmicutes(100)	Bacilli(100)	Lactobacillales(100)	Streptococcaceae(100)	Streptococcus(100)			0	0	0	0	0	0	0	0	0	0	0	0	0	0	0	0	0	0	1	0	0	0	0	0	0	0	0	0	0	0	0	0	0	0	2	0	0	0	1	0
Otu000490	4	Firmicutes(100)	Bacilli(100)	Lactobacillales(100)	unclassified(100)	unclassified(100)			0	0	0	0	0	0	0	0	0	0	0	1	0	0	0	0	0	0	0	0	0	0	0	0	2	0	0	0	0	0	0	0	0	0	1	0	0	0	0	0
Otu000491	4	Firmicutes(100)	Bacilli(100)	Lactobacillales(100)	Streptococcaceae(100)	Streptococcus(100)			0	0	0	0	0	0	0	0	0	0	0	0	0	0	0	0	0	0	2	0	0	0	0	0	0	0	0	0	0	1	0	0	0	0	1	0	0	0	0	0
Otu000492	4	Firmicutes(100)	Bacilli(100)	Lactobacillales(100)	unclassified(100)	unclassified(100)			0	0	0	0	0	0	0	0	2	0	0	0	0	0	0	0	0	0	0	0	0	0	0	0	0	0	0	0	2	0	0	0	0	0	0	0	0	0	0	0
Otu000493	4	Firmicutes(100)	Bacilli(100)	Lactobacillales(100)	unclassified(75)	unclassified(75)			0	0	0	0	0	0	0	0	0	0	0	0	0	0	0	0	0	0	0	0	0	0	0	0	0	0	1	0	2	0	0	0	0	0	1	0	0	0	0	0
Otu000494	4	Firmicutes(100)	Bacilli(100)	Bacillales(100)	Bacillales_Incertae_Sedis_XI(100)	Gemella(100)			0	0	0	0	0	0	0	0	0	0	0	0	0	0	0	0	0	0	0	0	0	0	0	0	3	0	0	0	0	0	0	0	0	0	0	0	0	0	1	0
Otu000495	4	Actinobacteria(100)	Actinobacteria(100)	Actinomycetales(100)	Dermabacteraceae(100)	Brachybacterium(100)			0	0	0	0	0	0	0	0	0	0	0	2	0	0	0	0	0	0	0	0	0	2	0	0	0	0	0	0	0	0	0	0	0	0	0	0	0	0	0	0
Otu000496	4	Firmicutes(100)	Bacilli(100)	Lactobacillales(100)	Streptococcaceae(100)	Streptococcus(100)			0	0	0	0	0	0	0	0	0	0	0	1	0	0	0	0	0	0	0	0	0	0	0	0	0	0	0	0	0	1	0	0	0	0	1	0	0	0	0	1
Otu000497	4	Proteobacteria(100)	Gammaproteobacteria(100)	Pseudomonadales(100)	Moraxellaceae(100)	Acinetobacter(100)			0	0	0	0	0	0	0	0	0	0	0	0	0	0	0	0	0	0	0	0	0	0	0	4	0	0	0	0	0	0	0	0	0	0	0	0	0	0	0	0
Otu000498	4	Firmicutes(100)	Bacilli(100)	Lactobacillales(100)	Streptococcaceae(75)	Streptococcus(75)			0	0	0	0	0	0	0	0	0	0	0	0	0	0	0	2	0	1	0	0	0	0	0	0	0	0	0	0	0	1	0	0	0	0	0	0	0	0	0	0
Otu000499	4	Proteobacteria(100)	Gammaproteobacteria(100)	Enterobacteriales(100)	Enterobacteriaceae(100)	Rosenbergiella(100)			0	0	0	0	0	0	0	0	0	0	0	0	0	0	0	0	0	0	1	0	0	0	0	0	2	0	0	0	0	0	0	0	0	0	0	0	0	0	0	0
Otu000500	4	Firmicutes(100)	Bacilli(100)	Lactobacillales(100)	unclassified(100)	unclassified(100)			0	0	0	0	0	0	0	0	0	0	0	0	0	0	0	0	0	0	0	0	0	0	0	0	0	0	0	0	1	2	0	0	0	0	0	0	0	0	1	0
Otu000501	4	Proteobacteria(100)	Gammaproteobacteria(100)	Pseudomonadales(100)	Moraxellaceae(100)	Acinetobacter(100)			0	0	0	0	0	0	0	0	0	0	0	0	0	0	0	0	0	0	0	0	0	0	0	0	0	0	0	0	0	0	0	0	0	4	0	0	0	0	0	0
Otu000502	4	Proteobacteria(100)	Gammaproteobacteria(100)	Pseudomonadales(100)	Moraxellaceae(100)	Acinetobacter(75)			0	0	0	0	0	0	0	0	0	4	0	0	0	0	0	0	0	0	0	0	0	0	0	0	0	0	0	0	0	0	0	0	0	0	0	0	0	0	0	0
Otu000503	4	Proteobacteria(100)	Gammaproteobacteria(100)	Pseudomonadales(100)	Moraxellaceae(100)	Acinetobacter(100)			0	0	0	0	0	0	0	0	0	2	0	0	0	0	0	0	0	0	0	0	0	0	0	0	0	0	0	0	0	0	0	0	0	0	0	2	0	0	0	0
Otu000504	4	Firmicutes(100)	Bacilli(100)	Lactobacillales(100)	Streptococcaceae(100)	Streptococcus(100)			0	0	0	0	0	0	0	0	0	0	0	0	0	0	1	0	0	1	0	0	0	0	0	0	0	0	0	0	0	0	0	0	0	0	2	0	0	0	0	0
Otu000505	4	Proteobacteria(100)	Gammaproteobacteria(100)	Enterobacteriales(100)	Enterobacteriaceae(100)	unclassified(100)			0	0	0	0	0	0	0	0	0	4	0	0	0	0	0	0	0	0	0	0	0	0	0	0	0	0	0	0	0	0	0	0	0	0	0	0	0	0	0	0
Otu000506	4	Proteobacteria(100)	Gammaproteobacteria(100)	Pseudomonadales(100)	Moraxellaceae(100)	Acinetobacter(100)			0	0	0	0	0	0	0	0	0	0	0	0	0	0	0	0	0	0	0	0	0	0	0	4	0	0	0	0	0	0	0	0	0	0	0	0	0	0	0	0
Otu000507	4	Proteobacteria(100)	Gammaproteobacteria(100)	Enterobacteriales(100)	Enterobacteriaceae(100)	unclassified(100)			0	0	0	0	0	0	0	0	0	4	0	0	0	0	0	0	0	0	0	0	0	0	0	0	0	0	0	0	0	0	0	0	0	0	0	0	0	0	0	0
Otu000508	4	Proteobacteria(100)	Gammaproteobacteria(100)	Enterobacteriales(100)	Enterobacteriaceae(100)	unclassified(100)			0	0	0	0	0	0	0	0	0	4	0	0	0	0	0	0	0	0	0	0	0	0	0	0	0	0	0	0	0	0	0	0	0	0	0	0	0	0	0	0
Otu000509	4	Firmicutes(100)	Bacilli(100)	Lactobacillales(100)	Streptococcaceae(100)	Streptococcus(100)			0	0	0	0	0	0	0	0	2	0	0	0	0	0	0	0	0	0	0	0	0	0	0	0	0	0	0	0	0	1	0	0	0	0	0	0	0	0	0	1
Otu000510	4	Proteobacteria(100)	Gammaproteobacteria(100)	Pseudomonadales(100)	Moraxellaceae(100)	Acinetobacter(100)			0	0	0	0	0	0	0	0	0	0	0	0	0	0	0	0	0	0	0	0	0	0	0	2	0	0	0	0	0	0	0	0	0	0	0	2	0	0	0	0
Otu000511	4	Firmicutes(100)	unclassified(100)	unclassified(100)	unclassified(100)	unclassified(100)			0	0	0	0	0	0	0	0	2	0	0	0	0	0	0	0	0	0	0	0	0	0	0	0	1	0	0	0	0	0	0	0	0	0	0	0	0	0	1	0
Otu000512	4	unclassified(100)	unclassified(100)	unclassified(100)	unclassified(100)	unclassified(100)			0	0	0	0	0	0	0	0	0	0	0	0	0	0	0	0	0	0	0	0	0	0	0	0	0	4	0	0	0	0	0	0	0	0	0	0	0	0	0	0
Otu000513	4	Proteobacteria(100)	Gammaproteobacteria(100)	Pseudomonadales(100)	Moraxellaceae(100)	Acinetobacter(100)			0	0	0	0	0	0	0	0	0	0	0	0	0	0	0	0	0	0	0	0	0	0	0	3	0	0	0	0	0	0	0	0	0	0	0	1	0	0	0	0
Otu000514	4	Firmicutes(100)	Bacilli(100)	Bacillales(100)	Staphylococcaceae(75)	Staphylococcus(75)			0	0	0	0	0	0	0	0	2	0	0	0	0	0	0	0	0	0	0	0	0	0	0	0	0	0	0	0	0	1	1	0	0	0	0	0	0	0	0	0
Otu000515	3	Proteobacteria(100)	Gammaproteobacteria(100)	Pseudomonadales(100)	Moraxellaceae(100)	Acinetobacter(100)			0	0	0	0	0	0	0	0	0	0	0	0	0	0	0	0	0	0	0	0	0	0	0	1	0	0	0	0	0	0	0	0	0	0	0	2	0	0	0	0
Otu000516	3	Proteobacteria(100)	Gammaproteobacteria(100)	Pseudomonadales(100)	Moraxellaceae(100)	Acinetobacter(100)			0	0	0	0	0	0	0	0	0	0	0	0	0	0	0	0	0	0	0	0	0	0	0	3	0	0	0	0	0	0	0	0	0	0	0	0	0	0	0	0
Otu000517	3	Proteobacteria(100)	Gammaproteobacteria(100)	Pseudomonadales(100)	Pseudomonadaceae(100)	unclassified(100)			0	0	0	0	0	0	0	0	1	0	0	0	0	0	0	0	0	0	0	0	0	1	0	0	0	0	0	0	0	0	1	0	0	0	0	0	0	0	0	0
Otu000518	3	Proteobacteria(100)	Gammaproteobacteria(100)	Pseudomonadales(100)	Moraxellaceae(100)	Enhydrobacter(100)			0	0	0	0	0	0	0	0	0	0	0	0	0	0	0	2	0	0	0	0	0	1	0	0	0	0	0	0	0	0	0	0	0	0	0	0	0	0	0	0
Otu000519	3	Proteobacteria(100)	Gammaproteobacteria(100)	Pseudomonadales(100)	Pseudomonadaceae(100)	Pseudomonas(100)			0	0	0	0	0	0	0	0	0	0	0	0	0	0	0	0	0	0	0	0	0	0	0	0	3	0	0	0	0	0	0	0	0	0	0	0	0	0	0	0
Otu000520	3	Proteobacteria(100)	Gammaproteobacteria(100)	Pseudomonadales(100)	Moraxellaceae(100)	Enhydrobacter(100)			0	0	0	0	0	0	0	0	0	0	0	0	0	0	0	0	0	0	0	0	0	1	0	0	0	0	0	0	0	0	0	0	0	0	0	2	0	0	0	0
Otu000521	3	Firmicutes(100)	Clostridia(100)	Clostridiales(100)	Lachnospiraceae(100)	Clostridium_XlVa(100)			0	0	0	0	0	0	0	0	0	0	0	0	0	0	0	0	0	0	0	0	0	0	0	0	0	0	0	0	0	0	0	0	0	0	3	0	0	0	0	0
Otu000522	3	Proteobacteria(100)	Gammaproteobacteria(100)	Pseudomonadales(100)	Moraxellaceae(100)	Enhydrobacter(100)			0	0	0	0	0	0	0	0	0	0	0	0	0	0	0	0	0	0	0	0	0	0	0	1	0	0	0	0	0	0	0	0	0	0	0	2	0	0	0	0
Otu000523	3	Firmicutes(100)	Bacilli(100)	unclassified(100)	unclassified(100)	unclassified(100)			0	0	0	0	0	0	0	0	0	0	0	0	0	0	0	0	0	0	0	0	0	0	1	0	1	0	0	0	0	0	0	1	0	0	0	0	0	0	0	0
Otu000524	3	Proteobacteria(100)	Gammaproteobacteria(100)	Pseudomonadales(100)	Moraxellaceae(100)	Acinetobacter(100)			0	0	0	0	0	0	0	0	0	0	0	0	0	0	0	0	0	0	0	0	0	0	0	2	0	0	0	0	0	0	0	0	0	0	0	1	0	0	0	0
Otu000525	3	Proteobacteria(100)	Gammaproteobacteria(100)	Pseudomonadales(100)	Moraxellaceae(100)	Acinetobacter(100)			0	0	0	0	0	0	0	0	0	0	0	0	0	0	0	0	0	0	0	0	0	0	0	1	0	0	0	0	0	0	0	0	0	0	0	2	0	0	0	0
Otu000526	3	Proteobacteria(100)	Gammaproteobacteria(100)	Pseudomonadales(100)	Moraxellaceae(100)	unclassified(100)			0	0	0	0	0	0	0	0	0	0	0	0	0	0	0	0	0	0	0	0	3	0	0	0	0	0	0	0	0	0	0	0	0	0	0	0	0	0	0	0
Otu000527	3	Firmicutes(100)	Bacilli(100)	unclassified(100)	unclassified(100)	unclassified(100)			0	0	0	0	0	0	0	0	0	0	0	0	0	0	0	0	0	0	0	0	0	0	0	0	0	0	3	0	0	0	0	0	0	0	0	0	0	0	0	0
Otu000528	3	Proteobacteria(100)	Gammaproteobacteria(100)	Pseudomonadales(100)	Moraxellaceae(100)	Acinetobacter(100)			0	0	0	0	0	0	0	0	0	0	0	0	0	0	0	0	0	0	0	0	0	0	0	3	0	0	0	0	0	0	0	0	0	0	0	0	0	0	0	0
Otu000529	3	Firmicutes(100)	Bacilli(100)	unclassified(100)	unclassified(100)	unclassified(100)			0	0	0	0	0	0	0	0	0	0	0	0	0	0	0	0	0	0	2	0	0	0	0	0	0	0	0	0	1	0	0	0	0	0	0	0	0	0	0	0
Otu000530	3	Proteobacteria(100)	Gammaproteobacteria(100)	Pseudomonadales(100)	Moraxellaceae(100)	Acinetobacter(100)			0	0	0	0	0	0	0	0	0	0	0	0	0	0	0	0	0	0	0	0	0	0	0	3	0	0	0	0	0	0	0	0	0	0	0	0	0	0	0	0
Otu000531	3	Proteobacteria(100)	Gammaproteobacteria(100)	Pseudomonadales(100)	Moraxellaceae(100)	Acinetobacter(100)			0	0	0	0	0	0	0	0	0	0	0	0	0	0	0	0	0	0	0	0	0	0	0	2	0	0	0	0	0	0	0	0	0	0	0	1	0	0	0	0
Otu000532	3	Proteobacteria(100)	Gammaproteobacteria(100)	Pseudomonadales(100)	Moraxellaceae(100)	Acinetobacter(100)			0	0	0	0	0	0	0	0	0	3	0	0	0	0	0	0	0	0	0	0	0	0	0	0	0	0	0	0	0	0	0	0	0	0	0	0	0	0	0	0
Otu000533	3	Proteobacteria(100)	Gammaproteobacteria(100)	Pseudomonadales(100)	Moraxellaceae(100)	Acinetobacter(100)			0	0	0	0	0	0	0	0	0	0	0	0	0	0	0	0	0	0	0	0	0	0	0	0	0	0	0	0	0	0	0	0	0	0	0	3	0	0	0	0
Otu000534	3	Proteobacteria(100)	Gammaproteobacteria(100)	Pseudomonadales(100)	Moraxellaceae(100)	Acinetobacter(100)			0	0	0	0	0	0	0	0	0	0	0	0	0	0	0	0	0	0	0	0	0	0	0	2	0	0	0	0	0	0	0	0	0	0	0	1	0	0	0	0
Otu000535	3	Proteobacteria(100)	Gammaproteobacteria(100)	Pseudomonadales(100)	Moraxellaceae(100)	Acinetobacter(100)			0	0	0	0	0	0	0	0	0	2	0	0	0	0	0	0	0	0	0	0	0	0	0	0	0	0	0	0	0	0	0	0	0	0	0	1	0	0	0	0
Otu000536	3	Proteobacteria(100)	Gammaproteobacteria(100)	Pseudomonadales(100)	Moraxellaceae(100)	Acinetobacter(100)			0	0	0	0	0	0	0	0	0	0	0	0	0	0	0	0	0	0	0	0	0	0	0	0	0	0	0	0	0	0	0	0	0	0	0	3	0	0	0	0
Otu000537	3	Proteobacteria(100)	Gammaproteobacteria(100)	Pseudomonadales(100)	Moraxellaceae(100)	Acinetobacter(100)			0	0	0	0	0	0	0	0	0	0	0	0	0	0	0	0	0	0	0	0	0	0	0	2	0	0	0	0	0	0	0	0	0	0	0	1	0	0	0	0
Otu000538	3	Firmicutes(100)	Bacilli(100)	unclassified(100)	unclassified(100)	unclassified(100)			0	0	0	0	0	0	0	0	0	0	0	0	0	0	0	0	0	3	0	0	0	0	0	0	0	0	0	0	0	0	0	0	0	0	0	0	0	0	0	0
Otu000539	3	Proteobacteria(100)	Gammaproteobacteria(100)	Pseudomonadales(100)	Moraxellaceae(100)	Acinetobacter(100)			0	0	0	0	0	0	0	0	0	0	0	0	0	0	0	0	0	0	0	0	0	0	0	0	0	0	0	0	0	0	0	0	0	0	0	3	0	0	0	0
Otu000540	3	Firmicutes(100)	Bacilli(100)	unclassified(100)	unclassified(100)	unclassified(100)			0	0	0	0	0	0	0	0	0	0	0	0	0	0	0	0	0	0	0	0	0	1	1	0	0	0	0	0	1	0	0	0	0	0	0	0	0	0	0	0
Otu000541	3	Proteobacteria(100)	Gammaproteobacteria(100)	Pseudomonadales(100)	Moraxellaceae(100)	Acinetobacter(100)			0	0	0	0	0	0	0	0	0	0	0	0	0	0	0	0	0	0	0	0	0	0	0	0	0	0	0	0	0	0	0	0	0	0	0	3	0	0	0	0
Otu000542	3	Firmicutes(100)	Bacilli(100)	Lactobacillales(100)	unclassified(100)	unclassified(100)			0	0	0	0	0	0	0	0	0	0	0	0	0	0	0	0	0	0	0	0	0	0	1	0	2	0	0	0	0	0	0	0	0	0	0	0	0	0	0	0
Otu000543	3	unclassified(100)	unclassified(100)	unclassified(100)	unclassified(100)	unclassified(100)			0	0	0	0	0	0	0	0	0	0	0	0	0	0	0	0	0	0	0	0	0	0	3	0	0	0	0	0	0	0	0	0	0	0	0	0	0	0	0	0
Otu000544	3	Firmicutes(100)	Bacilli(100)	Bacillales(100)	Staphylococcaceae(100)	Staphylococcus(67)			0	0	0	0	0	0	0	0	2	0	0	0	0	0	0	0	0	0	0	0	0	0	0	0	0	0	0	0	0	0	0	0	0	0	1	0	0	0	0	0
Otu000545	3	Firmicutes(100)	Bacilli(100)	Bacillales(100)	Staphylococcaceae(67)	unclassified(100)			0	0	0	0	0	0	0	0	0	0	0	0	0	0	0	0	0	0	0	0	0	0	0	0	0	1	0	0	0	0	0	0	0	0	1	0	0	0	0	1
Otu000546	3	Firmicutes(100)	Bacilli(100)	Bacillales(100)	Staphylococcaceae(67)	Staphylococcus(67)			0	0	0	0	0	0	0	0	1	0	0	0	0	0	0	0	0	0	0	0	0	0	0	0	0	0	0	0	0	0	0	0	0	1	0	0	0	0	0	1
Otu000547	3	Firmicutes(100)	Bacilli(100)	Bacillales(100)	Staphylococcaceae(67)	Staphylococcus(67)			0	0	0	0	0	0	0	0	0	0	1	0	0	0	0	0	0	1	0	0	0	0	1	0	0	0	0	0	0	0	0	0	0	0	0	0	0	0	0	0
Otu000548	3	unclassified(100)	unclassified(100)	unclassified(100)	unclassified(100)	unclassified(100)			0	0	0	0	0	0	0	0	0	0	0	0	0	0	0	0	0	0	0	0	0	0	0	0	1	0	0	0	0	0	0	0	0	0	2	0	0	0	0	0
Otu000549	3	unclassified(100)	unclassified(100)	unclassified(100)	unclassified(100)	unclassified(100)			0	0	0	0	0	0	0	0	0	0	0	0	0	0	0	0	0	0	0	0	0	2	0	0	0	0	0	0	0	1	0	0	0	0	0	0	0	0	0	0
Otu000550	3	unclassified(100)	unclassified(100)	unclassified(100)	unclassified(100)	unclassified(100)			0	0	0	0	0	0	0	0	0	1	0	0	0	0	0	0	0	0	0	0	0	1	0	0	1	0	0	0	0	0	0	0	0	0	0	0	0	0	0	0
Otu000551	3	unclassified(100)	unclassified(100)	unclassified(100)	unclassified(100)	unclassified(100)			0	0	0	0	0	0	0	0	0	0	0	0	0	0	0	0	0	0	0	1	0	1	0	0	1	0	0	0	0	0	0	0	0	0	0	0	0	0	0	0
Otu000552	3	unclassified(100)	unclassified(100)	unclassified(100)	unclassified(100)	unclassified(100)			0	0	0	0	0	0	0	0	0	0	0	0	0	0	0	0	0	0	0	0	0	1	0	2	0	0	0	0	0	0	0	0	0	0	0	0	0	0	0	0
Otu000553	3	unclassified(100)	unclassified(100)	unclassified(100)	unclassified(100)	unclassified(100)			0	0	0	0	0	0	0	0	0	3	0	0	0	0	0	0	0	0	0	0	0	0	0	0	0	0	0	0	0	0	0	0	0	0	0	0	0	0	0	0
Otu000554	3	unclassified(100)	unclassified(100)	unclassified(100)	unclassified(100)	unclassified(100)			0	0	0	0	0	0	0	0	0	0	0	0	0	0	0	0	0	1	0	0	0	0	0	0	0	0	0	0	0	0	0	0	0	0	0	2	0	0	0	0
Otu000555	3	unclassified(100)	unclassified(100)	unclassified(100)	unclassified(100)	unclassified(100)			0	0	0	0	0	0	0	0	0	0	0	1	0	0	1	0	0	0	0	0	0	0	0	0	1	0	0	0	0	0	0	0	0	0	0	0	0	0	0	0
Otu000556	3	unclassified(100)	unclassified(100)	unclassified(100)	unclassified(100)	unclassified(100)			0	0	0	0	0	0	0	0	0	0	0	0	0	0	2	0	0	0	0	0	0	0	0	0	0	0	0	1	0	0	0	0	0	0	0	0	0	0	0	0
Otu000557	3	unclassified(100)	unclassified(100)	unclassified(100)	unclassified(100)	unclassified(100)			0	0	0	0	0	0	0	0	0	0	0	0	0	0	3	0	0	0	0	0	0	0	0	0	0	0	0	0	0	0	0	0	0	0	0	0	0	0	0	0
Otu000558	3	Firmicutes(100)	Bacilli(100)	Lactobacillales(100)	Streptococcaceae(100)	Streptococcus(100)			0	0	0	0	0	0	0	0	0	0	0	0	0	0	0	0	0	0	0	0	0	0	0	0	0	0	3	0	0	0	0	0	0	0	0	0	0	0	0	0
Otu000559	3	Firmicutes(100)	Bacilli(100)	Lactobacillales(100)	Streptococcaceae(100)	Streptococcus(100)			0	0	0	0	0	0	0	0	0	0	0	0	0	0	1	0	0	0	0	0	0	0	0	0	0	0	0	0	1	0	0	1	0	0	0	0	0	0	0	0
Otu000560	3	Firmicutes(100)	Bacilli(100)	Lactobacillales(100)	Streptococcaceae(100)	unclassified(67)			0	0	0	0	0	0	0	0	0	0	0	0	0	0	0	2	0	0	0	0	0	0	0	0	0	0	0	0	1	0	0	0	0	0	0	0	0	0	0	0
Otu000561	3	Firmicutes(100)	Bacilli(100)	Lactobacillales(100)	Streptococcaceae(100)	Streptococcus(100)			0	0	0	0	0	0	0	0	0	0	0	0	0	0	0	0	0	0	0	0	0	0	0	0	0	0	0	0	0	1	0	0	0	0	0	0	0	0	0	2
Otu000562	3	Firmicutes(100)	Bacilli(100)	Lactobacillales(100)	unclassified(100)	unclassified(100)			0	0	0	0	0	0	0	0	1	0	0	0	0	0	0	1	0	1	0	0	0	0	0	0	0	0	0	0	0	0	0	0	0	0	0	0	0	0	0	0
Otu000563	3	Firmicutes(100)	Bacilli(100)	Lactobacillales(100)	Streptococcaceae(100)	Streptococcus(100)			0	0	0	0	0	0	0	0	0	0	0	0	0	0	0	0	0	0	0	0	0	0	0	0	0	0	0	0	0	0	0	0	0	0	3	0	0	0	0	0
Otu000564	3	Firmicutes(100)	Bacilli(100)	Lactobacillales(100)	Streptococcaceae(100)	Streptococcus(100)			0	0	0	0	0	0	0	0	0	0	0	0	0	0	1	0	0	0	0	0	0	0	0	0	1	0	0	0	1	0	0	0	0	0	0	0	0	0	0	0
Otu000565	3	Firmicutes(100)	Bacilli(100)	Lactobacillales(100)	Streptococcaceae(100)	Streptococcus(100)			0	0	0	0	0	0	0	0	0	0	0	0	0	3	0	0	0	0	0	0	0	0	0	0	0	0	0	0	0	0	0	0	0	0	0	0	0	0	0	0
Otu000566	3	Firmicutes(100)	Bacilli(100)	Lactobacillales(100)	Streptococcaceae(100)	Streptococcus(100)			0	0	0	0	0	0	0	0	0	0	0	0	0	0	0	0	0	0	0	0	0	0	0	0	0	0	0	0	0	1	0	0	0	0	0	0	0	0	2	0
Otu000567	3	Firmicutes(100)	Bacilli(100)	Lactobacillales(100)	Streptococcaceae(100)	Streptococcus(100)			0	0	0	0	0	0	0	0	0	0	0	0	0	0	1	0	0	0	0	0	0	1	1	0	0	0	0	0	0	0	0	0	0	0	0	0	0	0	0	0
Otu000568	3	Firmicutes(100)	Bacilli(100)	Lactobacillales(100)	Streptococcaceae(100)	Streptococcus(100)			0	0	0	0	0	0	0	0	0	0	0	0	0	0	1	0	0	0	0	1	0	0	0	0	0	0	0	0	0	0	0	0	0	0	0	0	0	0	1	0
Otu000569	3	Firmicutes(100)	Bacilli(100)	Lactobacillales(100)	Streptococcaceae(100)	Streptococcus(100)			0	0	0	0	0	0	0	0	0	0	0	0	0	0	0	0	0	0	0	0	0	2	0	0	0	0	0	0	0	0	0	0	0	0	1	0	0	0	0	0
Otu000570	3	Firmicutes(100)	Bacilli(100)	Lactobacillales(100)	Streptococcaceae(100)	Streptococcus(100)			0	0	0	0	0	0	0	0	0	0	0	0	0	0	0	0	0	0	0	0	0	0	0	0	0	0	0	0	0	0	0	0	0	0	3	0	0	0	0	0
Otu000571	3	Firmicutes(100)	Bacilli(100)	Lactobacillales(100)	Streptococcaceae(100)	Streptococcus(100)			0	0	0	0	0	0	0	0	0	0	0	0	0	0	1	0	0	0	0	0	0	0	0	0	0	0	0	0	0	1	0	0	0	0	1	0	0	0	0	0
Otu000572	3	Proteobacteria(100)	Alphaproteobacteria(100)	Rhizobiales(100)	Xanthobacteraceae(100)	Xanthobacter(67)			0	0	0	0	0	0	0	0	0	0	0	0	0	0	0	0	0	0	0	0	0	0	1	2	0	0	0	0	0	0	0	0	0	0	0	0	0	0	0	0
Otu000573	3	Firmicutes(100)	Clostridia(100)	unclassified(100)	unclassified(100)	unclassified(100)			0	0	0	0	0	0	0	0	0	0	0	0	0	0	0	0	0	0	0	0	0	0	0	0	0	0	0	0	0	0	0	0	0	0	3	0	0	0	0	0
Otu000574	3	Bacteroidetes(100)	Bacteroidia(100)	Bacteroidales(100)	Prevotellaceae(100)	unclassified(100)			0	0	0	0	0	0	0	0	0	0	0	0	0	0	0	0	0	0	0	0	0	3	0	0	0	0	0	0	0	0	0	0	0	0	0	0	0	0	0	0
Otu000575	3	Proteobacteria(100)	unclassified(100)	unclassified(100)	unclassified(100)	unclassified(100)			0	0	0	0	0	0	0	0	0	0	0	0	0	0	0	0	0	0	0	0	0	0	0	0	0	3	0	0	0	0	0	0	0	0	0	0	0	0	0	0
Otu000576	3	Proteobacteria(100)	unclassified(100)	unclassified(100)	unclassified(100)	unclassified(100)			0	0	0	0	0	0	0	0	0	3	0	0	0	0	0	0	0	0	0	0	0	0	0	0	0	0	0	0	0	0	0	0	0	0	0	0	0	0	0	0
Otu000577	3	Proteobacteria(100)	Betaproteobacteria(100)	Neisseriales(100)	Neisseriaceae(100)	unclassified(100)			0	0	0	0	0	0	0	0	0	0	0	0	0	0	0	0	0	0	0	0	0	3	0	0	0	0	0	0	0	0	0	0	0	0	0	0	0	0	0	0
Otu000578	3	Proteobacteria(100)	Betaproteobacteria(100)	Neisseriales(100)	Neisseriaceae(100)	Conchiformibius(100)			0	0	0	0	0	0	0	0	0	0	0	0	0	0	0	3	0	0	0	0	0	0	0	0	0	0	0	0	0	0	0	0	0	0	0	0	0	0	0	0
Otu000579	3	Proteobacteria(100)	Gammaproteobacteria(100)	Xanthomonadales(100)	Xanthomonadaceae(100)	Stenotrophomonas(100)			0	0	0	0	0	0	0	0	0	0	0	0	0	0	3	0	0	0	0	0	0	0	0	0	0	0	0	0	0	0	0	0	0	0	0	0	0	0	0	0
Otu000580	3	Proteobacteria(100)	Gammaproteobacteria(100)	Xanthomonadales(100)	Xanthomonadaceae(100)	Stenotrophomonas(100)			0	0	0	0	0	0	0	0	0	1	0	0	0	0	0	0	0	0	0	0	0	0	0	2	0	0	0	0	0	0	0	0	0	0	0	0	0	0	0	0
Otu000581	3	Bacteroidetes(100)	Sphingobacteriia(100)	Sphingobacteriales(100)	Chitinophagaceae(100)	Taibaiella(100)			0	0	0	0	0	0	0	0	0	3	0	0	0	0	0	0	0	0	0	0	0	0	0	0	0	0	0	0	0	0	0	0	0	0	0	0	0	0	0	0
Otu000582	3	Proteobacteria(100)	Gammaproteobacteria(100)	Xanthomonadales(100)	Xanthomonadaceae(100)	Stenotrophomonas(100)			0	0	0	0	0	0	0	0	0	2	0	0	0	0	1	0	0	0	0	0	0	0	0	0	0	0	0	0	0	0	0	0	0	0	0	0	0	0	0	0
Otu000583	3	Proteobacteria(100)	Alphaproteobacteria(100)	Sphingomonadales(100)	Sphingomonadaceae(100)	Sphingobium(100)			0	0	0	0	0	0	0	0	0	0	0	0	0	0	3	0	0	0	0	0	0	0	0	0	0	0	0	0	0	0	0	0	0	0	0	0	0	0	0	0
Otu000584	3	Firmicutes(100)	Negativicutes(100)	Selenomonadales(100)	Veillonellaceae(100)	Veillonella(67)			0	0	0	0	0	0	0	0	0	0	0	1	0	0	2	0	0	0	0	0	0	0	0	0	0	0	0	0	0	0	0	0	0	0	0	0	0	0	0	0
Otu000585	3	Proteobacteria(100)	Alphaproteobacteria(100)	Sphingomonadales(100)	Sphingomonadaceae(100)	Sandaracinobacter(100)			0	0	0	0	0	0	0	0	0	0	0	0	0	0	0	0	0	0	0	0	0	0	0	0	0	0	3	0	0	0	0	0	0	0	0	0	0	0	0	0
Otu000586	3	Firmicutes(100)	Negativicutes(100)	Selenomonadales(100)	Veillonellaceae(100)	Veillonella(100)			0	0	0	0	0	0	0	0	0	0	0	0	0	0	0	0	0	0	0	0	0	0	0	0	1	0	0	0	0	1	0	0	0	0	0	0	0	0	1	0
Otu000587	3	Firmicutes(100)	Clostridia(100)	Clostridiales(100)	Clostridiales_Incertae_Sedis_XIII(100)	Mogibacterium(100)			0	0	0	0	0	0	0	0	0	0	0	0	0	0	0	0	0	0	0	0	0	0	0	0	0	0	0	0	0	0	0	0	0	0	3	0	0	0	0	0
Otu000588	3	Proteobacteria(100)	Gammaproteobacteria(100)	Enterobacteriales(100)	Enterobacteriaceae(100)	unclassified(100)			0	0	0	0	0	0	0	0	0	3	0	0	0	0	0	0	0	0	0	0	0	0	0	0	0	0	0	0	0	0	0	0	0	0	0	0	0	0	0	0
Otu000589	3	Bacteroidetes(100)	Flavobacteriia(100)	Flavobacteriales(100)	Flavobacteriaceae(100)	Chryseobacterium(100)			0	0	0	0	0	0	0	0	0	3	0	0	0	0	0	0	0	0	0	0	0	0	0	0	0	0	0	0	0	0	0	0	0	0	0	0	0	0	0	0
Otu000590	3	Bacteroidetes(100)	Flavobacteriia(100)	Flavobacteriales(100)	Flavobacteriaceae(100)	Chryseobacterium(100)			0	0	0	0	0	0	0	0	0	3	0	0	0	0	0	0	0	0	0	0	0	0	0	0	0	0	0	0	0	0	0	0	0	0	0	0	0	0	0	0
Otu000591	3	Bacteroidetes(100)	Flavobacteriia(100)	Flavobacteriales(100)	Flavobacteriaceae(100)	Flavobacterium(100)			0	0	0	0	0	0	0	0	0	0	0	0	0	0	0	0	0	0	0	0	0	0	0	0	0	0	0	0	0	0	0	0	0	0	0	3	0	0	0	0
Otu000592	3	Bacteroidetes(100)	Flavobacteriia(100)	Flavobacteriales(100)	Flavobacteriaceae(100)	Chryseobacterium(100)			0	0	0	0	0	0	0	0	0	3	0	0	0	0	0	0	0	0	0	0	0	0	0	0	0	0	0	0	0	0	0	0	0	0	0	0	0	0	0	0
Otu000593	3	Proteobacteria(100)	Gammaproteobacteria(100)	Enterobacteriales(100)	Enterobacteriaceae(100)	unclassified(100)			0	0	0	0	0	0	0	0	0	2	0	0	0	0	0	0	0	0	0	0	0	0	0	0	0	0	0	0	0	1	0	0	0	0	0	0	0	0	0	0
Otu000594	3	Proteobacteria(100)	Gammaproteobacteria(100)	Enterobacteriales(100)	Enterobacteriaceae(100)	unclassified(100)			0	0	0	0	0	0	0	0	0	0	0	0	0	0	0	0	0	0	0	0	0	0	0	1	0	0	0	0	0	0	0	0	0	0	0	0	0	0	0	0
Otu000595	3	Proteobacteria(100)	Gammaproteobacteria(100)	Enterobacteriales(100)	Enterobacteriaceae(100)	unclassified(100)			0	0	0	0	0	0	0	0	0	0	0	0	0	0	0	0	0	0	0	0	0	0	0	0	0	0	0	0	0	0	0	0	0	0	0	0	0	0	0	0
Otu000596	3	Proteobacteria(100)	Gammaproteobacteria(100)	Enterobacteriales(100)	Enterobacteriaceae(100)	unclassified(100)			0	0	0	0	0	0	0	0	0	0	0	0	0	0	0	0	0	0	0	0	0	0	0	0	0	0	0	0	0	0	0	0	0	0	0	0	3	0	0	0
Otu000597	3	Proteobacteria(100)	Gammaproteobacteria(100)	Enterobacteriales(100)	Enterobacteriaceae(100)	unclassified(100)			0	0	0	0	0	0	0	0	0	3	0	0	0	0	0	0	0	0	0	0	0	0	0	0	0	0	0	0	0	0	0	0	0	0	0	0	0	0	0	0
Otu000598	3	Proteobacteria(100)	Gammaproteobacteria(100)	Enterobacteriales(100)	Enterobacteriaceae(100)	unclassified(100)			0	0	0	0	0	0	0	0	1	0	0	0	0	0	0	0	0	0	0	0	0	0	0	0	0	0	0	0	0	0	0	0	0	0	0	2	0	0	0	0
Otu000599	3	Proteobacteria(100)	Gammaproteobacteria(100)	Enterobacteriales(100)	Enterobacteriaceae(100)	unclassified(100)			0	0	0	0	0	0	0	0	0	3	0	0	0	0	0	0	0	0	0	0	0	0	0	0	0	0	0	0	0	0	0	0	0	0	0	0	0	0	0	0
Otu000600	3	Proteobacteria(100)	Gammaproteobacteria(100)	Enterobacteriales(100)	Enterobacteriaceae(100)	unclassified(100)			0	0	0	0	0	0	0	0	0	1	0	0	0	0	0	0	0	0	0	0	0	0	0	0	0	0	0	0	0	0	0	0	0	0	0	2	0	0	0	0
Otu000601	3	Actinobacteria(100)	Actinobacteria(100)	Actinomycetales(100)	unclassified(100)	unclassified(100)			0	0	0	0	0	0	0	0	0	0	0	0	0	0	0	0	0	0	0	0	0	0	1	0	0	0	0	1	0	0	0	1	0	0	0	0	0	0	0	0
Otu000602	3	Firmicutes(100)	unclassified(100)	unclassified(100)	unclassified(100)	unclassified(100)			0	0	0	0	0	0	0	0	0	0	0	0	0	0	1	0	0	1	0	0	0	0	0	0	0	0	0	0	0	1	0	0	0	0	0	0	0	0	0	0
Otu000603	3	Actinobacteria(100)	Actinobacteria(100)	Actinomycetales(100)	Micrococcaceae(67)	Rothia(67)			0	0	0	0	0	0	0	0	0	0	0	0	0	0	0	0	0	0	1	0	0	0	0	0	0	1	0	0	0	0	0	0	0	0	0	0	0	0	1	0
Otu000604	3	Actinobacteria(100)	Actinobacteria(100)	Actinomycetales(100)	Corynebacteriaceae(100)	Corynebacterium(100)			0	0	0	0	0	0	0	0	0	0	0	0	0	0	0	0	0	0	0	0	0	0	0	0	0	0	2	0	1	0	0	0	0	0	0	0	0	0	0	0
Otu000605	3	Actinobacteria(100)	Actinobacteria(100)	Actinomycetales(100)	Propionibacteriaceae(100)	Propionibacterium(100)			0	0	0	0	0	0	0	0	0	0	0	0	0	0	0	0	0	0	0	0	0	0	0	0	0	0	1	0	2	0	0	0	0	0	0	0	0	0	0	0
Otu000606	3	Actinobacteria(100)	Actinobacteria(100)	Actinomycetales(100)	unclassified(100)	unclassified(100)			0	0	0	0	0	0	0	0	0	0	0	0	0	0	0	0	1	0	0	0	0	0	0	0	0	0	1	0	0	0	0	0	0	0	0	0	0	0	1	0
Otu000607	3	Proteobacteria(100)	Gammaproteobacteria(100)	unclassified(100)	unclassified(100)	unclassified(100)			0	0	0	0	0	0	0	0	0	0	0	1	0	0	0	0	0	0	0	0	0	0	2	0	0	0	0	0	0	0	0	0	0	0	0	0	0	0	0	0
Otu000608	3	Proteobacteria(100)	Gammaproteobacteria(100)	unclassified(100)	unclassified(100)	unclassified(100)			0	0	0	0	0	0	0	0	0	0	0	0	0	0	0	0	0	1	0	0	0	0	0	1	0	0	0	0	0	0	0	0	0	0	0	1	0	0	0	0
Otu000609	3	Proteobacteria(100)	Gammaproteobacteria(100)	unclassified(100)	unclassified(100)	unclassified(100)			0	0	0	0	0	0	0	0	0	3	0	0	0	0	0	0	0	0	0	0	0	0	0	0	0	0	0	0	0	0	0	0	0	0	0	0	0	0	0	0
Otu000610	3	Actinobacteria(100)	Actinobacteria(100)	Actinomycetales(100)	Corynebacteriaceae(100)	Corynebacterium(100)			0	0	0	0	0	0	0	0	0	0	0	0	0	0	0	0	0	0	0	1	0	0	0	0	1	0	0	0	1	0	0	0	0	0	0	0	0	0	0	0
Otu000611	3	Actinobacteria(100)	Actinobacteria(100)	Actinomycetales(100)	unclassified(67)	unclassified(67)			0	0	0	0	0	0	0	0	0	3	0	0	0	0	0	0	0	0	0	0	0	0	0	0	0	0	0	0	0	0	0	0	0	0	0	0	0	0	0	0
Otu000612	3	Actinobacteria(100)	Actinobacteria(100)	Actinomycetales(100)	Geodermatophilaceae(100)	Blastococcus(100)			0	0	0	0	0	0	0	0	2	0	0	0	0	0	0	0	0	0	0	0	0	0	0	0	0	0	0	0	0	0	0	0	0	0	0	0	0	0	0	0
Otu000613	3	Actinobacteria(100)	Actinobacteria(100)	Actinomycetales(100)	Propionibacteriaceae(100)	Propionibacterium(100)			0	0	0	0	0	0	0	0	0	0	0	0	0	0	0	1	0	0	0	1	0	0	0	0	1	0	0	0	0	0	0	0	0	0	0	0	0	0	0	0
Otu000614	3	Actinobacteria(100)	Actinobacteria(100)	Actinomycetales(100)	Nocardiaceae(100)	Gordonia(100)			0	2	0	0	0	0	0	0	0	0	0	0	0	0	0	0	0	0	0	0	0	0	0	0	0	0	0	0	1	0	0	0	0	0	0	0	0	0	0	0
Otu000615	3	Actinobacteria(100)	Actinobacteria(100)	Actinomycetales(100)	Actinomycetaceae(100)	Actinomyces(100)			0	0	0	0	0	0	0	0	0	0	0	0	1	0	0	0	0	0	0	0	0	0	0	0	0	0	0	0	0	0	0	0	0	0	2	0	0	0	0	0
Otu000616	3	Actinobacteria(100)	Actinobacteria(100)	Actinomycetales(100)	Corynebacteriaceae(100)	Corynebacterium(100)			0	0	0	0	0	0	0	0	0	0	0	0	0	0	0	3	0	0	0	0	0	0	0	0	0	0	0	0	0	0	0	0	0	0	0	0	0	0	0	0
Otu000617	3	Proteobacteria(100)	Gammaproteobacteria(100)	Pasteurellales(100)	Pasteurellaceae(100)	Haemophilus(100)			0	0	0	0	0	0	0	0	0	0	0	0	0	0	0	3	0	0	0	0	0	0	0	0	0	0	0	0	0	0	0	0	0	0	0	0	0	0	0	0
Otu000618	3	Actinobacteria(100)	Actinobacteria(100)	Actinomycetales(100)	Cellulomonadaceae(100)	Cellulomonas(100)			0	0	0	0	0	0	0	0	0	0	0	0	0	0	0	0	0	0	0	0	0	0	0	0	0	0	0	0	0	0	0	0	0	0	0	3	0	0	0	0
Otu000619	3	Proteobacteria(100)	Betaproteobacteria(100)	Burkholderiales(100)	Oxalobacteraceae(100)	Herbaspirillum(100)			0	0	0	0	0	0	0	0	0	0	0	0	0	0	0	0	0	0	0	0	0	0	2	0	0	0	0	0	0	0	0	0	0	0	1	0	0	0	0	0
Otu000620	3	Proteobacteria(100)	Betaproteobacteria(100)	Burkholderiales(100)	Oxalobacteraceae(100)	unclassified(100)			0	0	0	0	0	0	0	0	0	0	0	0	0	0	0	0	0	0	0	0	0	0	0	0	0	1	0	0	0	0	0	2	0	0	0	0	0	0	0	0
Otu000621	3	Actinobacteria(100)	Actinobacteria(100)	Actinomycetales(100)	Propionibacteriaceae(100)	Propionibacterium(100)			0	0	0	0	0	0	0	0	0	0	0	0	0	0	0	0	0	0	0	0	0	2	0	0	0	0	0	0	0	0	0	0	0	0	1	0	0	0	0	0
Otu000622	3	Firmicutes(100)	Clostridia(100)	Clostridiales(100)	Lachnospiraceae(100)	unclassified(100)			0	0	0	0	0	0	0	0	0	0	0	0	0	0	0	0	0	0	0	0	0	0	0	3	0	0	0	0	0	0	0	0	0	0	0	0	0	0	0	0
Otu000623	3	Firmicutes(100)	Bacilli(100)	Lactobacillales(100)	Streptococcaceae(100)	Streptococcus(100)			0	0	0	0	0	0	0	0	0	0	0	0	0	3	0	0	0	0	0	0	0	0	0	0	0	0	0	0	0	0	0	0	0	0	0	0	0	0	0	0
Otu000624	3	Firmicutes(100)	Bacilli(100)	Lactobacillales(100)	Streptococcaceae(100)	Streptococcus(100)			0	0	0	0	0	0	0	0	0	0	0	0	0	0	0	0	0	0	0	0	0	0	0	0	0	0	0	0	0	2	0	0	0	0	1	0	0	0	0	0
Otu000625	3	Actinobacteria(100)	Actinobacteria(100)	Actinomycetales(100)	Actinomycetaceae(100)	Actinomyces(100)			0	0	0	0	0	0	0	0	0	0	0	0	0	0	0	0	0	0	0	0	0	0	2	0	0	0	0	0	0	0	0	0	0	0	1	0	0	0	0	0
Otu000626	3	Firmicutes(100)	Bacilli(100)	Lactobacillales(100)	Streptococcaceae(100)	Streptococcus(100)			0	0	0	0	0	0	0	0	0	0	0	0	0	0	0	0	0	0	0	0	0	0	0	0	0	0	0	0	0	1	0	0	0	0	1	0	0	0	1	0
Otu000627	3	Firmicutes(100)	Bacilli(100)	Lactobacillales(100)	Streptococcaceae(100)	Streptococcus(100)			0	0	0	0	0	0	0	0	1	0	0	0	0	0	0	0	0	0	0	0	0	0	0	0	0	0	0	0	0	2	0	0	0	0	0	0	0	0	0	0
Otu000628	3	Firmicutes(100)	Bacilli(100)	Lactobacillales(100)	Streptococcaceae(100)	Streptococcus(100)			0	0	0	0	0	0	0	0	0	0	0	0	0	0	1	0	0	0	0	0	0	0	0	0	2	0	0	0	0	0	0	0	0	0	0	0	0	0	0	0
Otu000629	3	Firmicutes(100)	Bacilli(100)	Lactobacillales(100)	unclassified(67)	unclassified(67)			0	0	0	0	0	0	0	0	0	0	0	0	0	0	0	0	0	0	0	0	0	0	0	0	0	0	0	0	3	0	0	0	0	0	0	0	0	0	0	0
Otu000630	3	Firmicutes(100)	Bacilli(100)	Lactobacillales(100)	Streptococcaceae(100)	Streptococcus(100)			0	0	0	0	0	0	0	0	0	0	0	0	0	0	0	0	0	0	0	0	0	0	0	0	0	0	0	0	0	0	0	0	0	0	1	0	0	0	2	0
Otu000631	3	Actinobacteria(100)	Actinobacteria(100)	Actinomycetales(100)	Propionibacteriaceae(100)	Propionibacterium(100)			0	0	0	0	0	0	0	0	0	0	0	0	0	0	0	0	0	0	0	0	0	1	0	0	0	0	0	0	0	0	0	0	0	0	2	0	0	0	0	0
Otu000632	3	Firmicutes(100)	Bacilli(100)	Lactobacillales(100)	Streptococcaceae(100)	Streptococcus(100)			0	0	0	0	0	0	0	0	0	0	1	0	0	0	0	0	0	0	1	0	0	0	0	0	0	0	0	0	0	0	0	1	0	0	0	0	0	0	0	0
Otu000633	3	Firmicutes(100)	Bacilli(100)	Lactobacillales(100)	Streptococcaceae(100)	Streptococcus(100)			0	0	0	0	0	0	0	0	0	0	0	0	0	0	1	0	0	0	0	0	0	1	0	0	0	0	0	0	0	0	0	0	0	0	1	0	0	0	0	0
Otu000634	3	Firmicutes(100)	Bacilli(100)	Lactobacillales(100)	Streptococcaceae(100)	Streptococcus(67)			0	0	0	0	0	0	0	0	0	0	0	1	0	0	0	0	0	0	0	0	0	0	0	0	0	0	0	0	0	0	1	0	0	0	0	0	0	0	1	0
Otu000635	3	Actinobacteria(100)	Actinobacteria(100)	Actinomycetales(100)	Corynebacteriaceae(100)	Corynebacterium(100)			0	0	0	0	0	0	0	0	0	0	2	0	0	0	0	0	0	0	0	0	0	0	0	0	0	0	0	0	0	0	0	0	0	0	1	0	0	0	0	0
Otu000636	3	Actinobacteria(100)	Actinobacteria(100)	Actinomycetales(100)	unclassified(100)	unclassified(100)			0	0	0	0	0	0	0	0	1	0	1	0	0	0	0	0	0	0	0	0	0	0	0	0	0	0	0	0	0	0	0	1	0	0	0	0	0	0	0	0
Otu000637	2	Firmicutes(100)	Bacilli(100)	Bacillales(100)	Bacillaceae_1(100)	Bacillus(100)			0	0	0	0	0	0	0	0	0	0	0	0	0	0	0	0	0	0	0	0	0	0	0	0	2	0	0	0	0	0	0	0	0	0	0	0	0	0	0	0
Otu000638	2	Firmicutes(100)	Bacilli(100)	Bacillales(100)	Staphylococcaceae(100)	Staphylococcus(100)			0	0	0	0	0	0	0	0	0	0	0	0	0	0	0	0	0	0	0	0	2	0	0	0	0	0	0	0	0	0	0	0	0	0	0	0	0	0	0	0
Otu000639	2	Firmicutes(100)	Bacilli(100)	Bacillales(100)	Staphylococcaceae(100)	Staphylococcus(100)			0	0	0	0	0	0	0	0	2	0	0	0	0	0	0	0	0	0	0	0	0	0	0	0	0	0	0	0	0	0	0	0	0	0	0	0	0	0	0	0
Otu000640	2	Firmicutes(100)	Bacilli(100)	Bacillales(100)	Staphylococcaceae(100)	Staphylococcus(100)			0	0	0	0	0	0	0	0	0	0	0	0	0	0	0	0	0	0	0	0	2	0	0	0	0	0	0	0	0	0	0	0	0	0	0	0	0	0	0	0
Otu000641	2	Bacteroidetes(100)	Flavobacteriia(100)	Flavobacteriales(100)	Flavobacteriaceae(100)	Chryseobacterium(100)			0	0	0	0	0	0	0	0	0	0	0	0	0	0	0	2	0	0	0	0	0	0	0	0	0	0	0	0	0	0	0	0	0	0	0	0	0	0	0	0
Otu000642	2	Proteobacteria(100)	Alphaproteobacteria(100)	Caulobacterales(100)	Caulobacteraceae(100)	Brevundimonas(100)			0	0	0	0	0	0	0	0	0	0	0	0	0	0	2	0	0	0	0	0	0	0	0	0	0	0	0	0	0	0	0	0	0	0	0	0	0	0	0	0
Otu000643	2	Acidobacteria(100)	Acidobacteria_Gp4(100)	Aridibacter(100)	unclassified(100)	unclassified(100)			0	0	0	0	0	0	0	0	0	0	0	0	0	0	0	0	0	0	2	0	0	0	0	0	0	0	0	0	0	0	0	0	0	0	0	0	0	0	0	0
Otu000644	2	Firmicutes(100)	Bacilli(100)	Lactobacillales(100)	Streptococcaceae(100)	Streptococcus(100)			0	0	0	0	0	0	0	0	0	0	0	0	0	0	0	0	0	0	0	0	0	0	0	0	1	0	0	0	0	0	0	0	0	0	0	0	0	0	1	0
Otu000645	2	Firmicutes(100)	Bacilli(100)	Bacillales(100)	unclassified(100)	unclassified(100)			0	0	0	0	0	0	0	0	0	0	0	0	0	0	0	0	0	0	1	0	0	0	1	0	0	0	0	0	0	0	0	0	0	0	0	0	0	0	0	0
Otu000646	2	Firmicutes(100)	Bacilli(100)	unclassified(100)	unclassified(100)	unclassified(100)			0	0	0	0	0	0	0	0	1	0	0	0	0	0	0	0	0	0	0	0	0	0	0	0	0	0	0	0	0	0	0	0	0	0	0	0	0	0	1	0
Otu000647	2	Firmicutes(100)	Bacilli(100)	unclassified(100)	unclassified(100)	unclassified(100)			0	0	0	0	0	0	0	0	0	0	0	0	0	0	0	0	0	0	0	0	2	0	0	0	0	0	0	0	0	0	0	0	0	0	0	0	0	0	0	0
Otu000648	2	Firmicutes(100)	Bacilli(100)	unclassified(100)	unclassified(100)	unclassified(100)			0	0	0	0	0	0	0	0	0	0	0	0	0	0	1	0	0	0	0	0	0	0	0	0	0	0	0	0	0	1	0	0	0	0	0	0	0	0	0	0
Otu000649	2	Firmicutes(100)	Bacilli(100)	unclassified(100)	unclassified(100)	unclassified(100)			0	0	0	0	0	0	0	0	0	0	0	0	0	0	0	0	1	0	0	0	0	0	0	0	0	0	0	0	0	0	0	0	0	0	1	0	0	0	0	0
Otu000650	2	Firmicutes(100)	Bacilli(100)	unclassified(100)	unclassified(100)	unclassified(100)			0	0	0	0	0	0	0	0	1	0	0	0	0	0	0	1	0	0	0	0	0	0	0	0	0	0	0	0	0	0	0	0	0	0	0	0	0	0	0	0
Otu000651	2	Firmicutes(100)	Bacilli(100)	Bacillales(100)	Staphylococcaceae(100)	Staphylococcus(100)			0	0	0	0	0	0	0	0	0	0	0	0	0	0	0	0	0	0	0	0	1	0	0	1	0	0	0	0	0	0	0	0	0	0	0	0	0	0	0	0
Otu000652	2	Firmicutes(100)	Bacilli(100)	Bacillales(100)	unclassified(100)	unclassified(100)			0	0	0	0	0	0	0	0	0	0	0	0	0	0	0	0	0	0	1	0	0	0	0	0	0	0	0	0	1	0	0	0	0	0	0	0	0	0	0	0
Otu000653	2	Firmicutes(100)	Bacilli(100)	Bacillales(100)	unclassified(100)	unclassified(100)			0	0	0	0	0	0	0	0	0	0	0	0	0	0	0	0	0	0	0	0	0	0	0	0	0	0	0	0	1	0	0	1	0	0	0	0	0	0	0	0
Otu000654	2	Firmicutes(100)	Bacilli(100)	Bacillales(100)	Staphylococcaceae(100)	Staphylococcus(100)			0	0	0	0	0	0	0	0	0	0	0	0	0	0	0	0	0	0	0	0	0	0	0	0	0	0	0	0	0	0	0	0	0	0	1	0	0	1	0	0
Otu000655	2	Firmicutes(100)	Bacilli(100)	Bacillales(100)	Staphylococcaceae(100)	Staphylococcus(100)			0	0	0	0	0	0	0	0	0	0	0	0	0	0	0	0	0	0	0	0	0	0	0	0	0	0	1	0	0	0	0	0	0	0	0	0	0	0	1	0
Otu000656	2	Firmicutes(100)	Bacilli(100)	Bacillales(100)	Staphylococcaceae(100)	Staphylococcus(100)			0	0	0	0	0	0	0	0	0	0	0	0	0	0	0	0	0	0	0	0	2	0	0	0	0	0	0	0	0	0	0	0	0	0	0	0	0	0	0	0
Otu000657	2	Firmicutes(100)	Bacilli(100)	Bacillales(100)	Staphylococcaceae(100)	Staphylococcus(100)			0	0	0	0	0	0	0	0	0	0	0	0	0	0	0	0	0	2	0	0	0	0	0	0	0	0	0	0	0	0	0	0	0	0	0	0	0	0	0	0
Otu000658	2	Firmicutes(100)	Bacilli(100)	Bacillales(100)	Staphylococcaceae(100)	Staphylococcus(100)			0	0	0	0	0	0	0	0	0	0	0	0	0	0	0	0	0	0	0	0	0	0	0	0	0	0	0	0	0	0	0	0	1	0	0	0	0	0	0	1
Otu000659	2	Firmicutes(100)	Bacilli(100)	Bacillales(100)	Bacillales_Incertae_Sedis_XI(100)	Gemella(100)			0	0	0	0	0	0	0	0	0	0	0	0	0	0	0	0	0	0	0	0	0	0	0	0	0	0	0	0	0	0	0	0	0	0	0	2	0	0	0	0
Otu000660	2	Firmicutes(100)	Bacilli(100)	Bacillales(100)	Staphylococcaceae(100)	Staphylococcus(100)			0	0	0	0	0	0	0	0	0	0	0	0	0	0	0	0	0	0	0	0	2	0	0	0	0	0	0	0	0	0	0	0	0	0	0	0	0	0	0	0
Otu000661	2	Firmicutes(100)	Bacilli(100)	Bacillales(100)	Bacillales_Incertae_Sedis_X(100)	Thermicanus(100)			2	0	0	0	0	0	0	0	0	0	0	0	0	0	0	0	0	0	0	0	0	0	0	0	0	0	0	0	0	0	0	0	0	0	0	0	0	0	0	0
Otu000662	2	Firmicutes(100)	Bacilli(100)	Bacillales(100)	Staphylococcaceae(100)	Staphylococcus(100)			0	0	0	0	0	0	0	0	0	0	0	0	0	0	0	0	0	0	0	0	0	0	0	0	0	0	0	2	0	0	0	0	0	0	0	0	0	0	0	0
Otu000663	2	Firmicutes(100)	Bacilli(100)	Bacillales(100)	Staphylococcaceae(100)	Staphylococcus(100)			0	0	0	0	0	0	0	0	0	0	0	0	0	0	0	0	0	0	0	0	0	0	0	0	0	0	0	0	0	0	0	1	0	1	0	0	0	0	0	0
Otu000664	2	Firmicutes(100)	Bacilli(100)	Bacillales(100)	Staphylococcaceae(100)	Staphylococcus(100)			0	0	0	0	0	0	0	0	0	0	0	0	0	0	0	0	0	0	0	0	1	0	0	0	0	0	0	0	0	0	0	0	0	0	0	0	0	1	0	0
Otu000665	2	Firmicutes(100)	Bacilli(100)	Bacillales(100)	Staphylococcaceae(100)	Staphylococcus(100)			0	0	0	0	0	0	0	0	0	0	0	0	0	0	0	0	0	2	0	0	0	0	0	0	0	0	0	0	0	0	0	0	0	0	0	0	0	0	0	0
Otu000666	2	Firmicutes(100)	Bacilli(100)	Bacillales(100)	Staphylococcaceae(100)	Staphylococcus(100)			0	0	0	0	0	0	0	0	0	0	0	0	0	0	0	0	0	0	0	0	0	0	0	0	0	0	0	2	0	0	0	0	0	0	0	0	0	0	0	0
Otu000667	2	Firmicutes(100)	Bacilli(100)	unclassified(100)	unclassified(100)	unclassified(100)			0	0	0	0	0	0	0	0	0	0	0	0	0	0	0	0	0	0	0	0	0	0	0	0	0	0	2	0	0	0	0	0	0	0	0	0	0	0	0	0
Otu000668	2	Firmicutes(100)	Bacilli(100)	Bacillales(100)	Staphylococcaceae(100)	Staphylococcus(100)			0	0	0	0	0	0	0	0	0	0	0	0	0	0	0	0	0	0	0	0	1	1	0	0	0	0	0	0	0	0	0	0	0	0	0	0	0	0	0	0
Otu000669	2	Firmicutes(100)	Bacilli(100)	Bacillales(100)	unclassified(100)	unclassified(100)			0	0	0	0	0	0	0	0	0	0	0	0	0	0	0	0	1	0	0	0	0	0	0	0	0	1	0	0	0	0	0	0	0	0	0	0	0	0	0	0
Otu000670	2	Firmicutes(100)	Bacilli(100)	Bacillales(100)	Bacillales_Incertae_Sedis_XI(100)	Gemella(100)			0	0	0	0	0	0	0	0	0	0	0	0	0	0	0	0	0	0	0	0	0	0	2	0	0	0	0	0	0	0	0	0	0	0	0	0	0	0	0	0
Otu000671	2	Firmicutes(100)	Bacilli(100)	Bacillales(100)	Staphylococcaceae(100)	Staphylococcus(100)			0	0	0	0	0	0	0	0	0	0	0	0	0	0	0	0	0	0	0	0	0	0	0	0	0	0	0	0	0	0	0	2	0	0	0	0	0	0	0	0
Otu000672	2	unclassified(100)	unclassified(100)	unclassified(100)	unclassified(100)	unclassified(100)			0	0	0	0	0	0	0	0	1	0	0	0	0	0	0	0	0	0	0	0	0	0	0	0	0	0	1	0	0	0	0	0	0	0	0	0	0	0	0	0
Otu000673	2	unclassified(100)	unclassified(100)	unclassified(100)	unclassified(100)	unclassified(100)			0	0	0	0	0	0	0	0	0	0	0	0	0	0	0	0	0	0	0	1	0	0	0	0	0	0	0	0	0	0	0	0	0	0	0	0	0	0	0	0
Otu000674	2	unclassified(100)	unclassified(100)	unclassified(100)	unclassified(100)	unclassified(100)			0	0	0	0	0	0	0	0	0	0	0	0	0	0	0	0	0	1	0	0	0	0	0	1	0	0	0	0	0	0	0	0	0	0	0	0	0	0	0	0
Otu000675	2	unclassified(100)	unclassified(100)	unclassified(100)	unclassified(100)	unclassified(100)			0	0	0	0	0	0	0	0	0	0	1	0	0	0	0	0	0	0	0	0	0	0	0	0	0	0	0	0	1	0	0	0	0	0	0	0	0	0	0	0
Otu000676	2	unclassified(100)	unclassified(100)	unclassified(100)	unclassified(100)	unclassified(100)			0	0	0	0	0	0	0	0	0	0	0	0	0	0	0	0	0	0	0	0	0	0	0	0	0	0	0	0	2	0	0	0	0	0	0	0	0	0	0	0
Otu000677	2	unclassified(100)	unclassified(100)	unclassified(100)	unclassified(100)	unclassified(100)			0	0	0	0	0	0	0	0	0	0	0	0	0	0	0	0	0	0	0	0	0	0	0	0	0	0	0	0	0	0	0	2	0	0	0	0	0	0	0	0
Otu000678	2	unclassified(100)	unclassified(100)	unclassified(100)	unclassified(100)	unclassified(100)			0	0	0	0	0	0	0	0	0	0	0	0	0	0	1	0	0	0	0	0	0	0	0	0	0	0	0	0	0	0	0	0	0	0	0	1	0	0	0	0
Otu000679	2	unclassified(100)	unclassified(100)	unclassified(100)	unclassified(100)	unclassified(100)			0	0	0	0	0	0	0	0	0	0	0	0	0	0	0	1	0	0	0	0	0	1	0	0	0	0	0	0	0	0	0	0	0	0	0	0	0	0	0	0
Otu000680	2	unclassified(100)	unclassified(100)	unclassified(100)	unclassified(100)	unclassified(100)			0	0	0	0	0	0	0	0	0	1	0	0	0	0	0	0	0	0	0	0	0	0	0	0	0	0	0	0	0	0	0	0	0	0	0	1	0	0	0	0
Otu000681	2	unclassified(100)	unclassified(100)	unclassified(100)	unclassified(100)	unclassified(100)			0	0	0	0	0	0	0	0	0	0	0	0	0	0	0	0	0	0	0	0	2	0	0	0	0	0	0	0	0	0	0	0	0	0	0	0	0	0	0	0
Otu000682	2	unclassified(100)	unclassified(100)	unclassified(100)	unclassified(100)	unclassified(100)			0	0	0	0	0	0	0	0	0	0	0	0	0	0	0	0	0	0	0	0	2	0	0	0	0	0	0	0	0	0	0	0	0	0	0	0	0	0	0	0
Otu000683	2	unclassified(100)	unclassified(100)	unclassified(100)	unclassified(100)	unclassified(100)			0	0	0	0	0	0	0	0	0	0	0	0	0	0	0	0	0	0	0	0	0	0	0	0	1	0	0	0	0	0	0	0	0	0	1	0	0	0	0	0
Otu000684	2	unclassified(100)	unclassified(100)	unclassified(100)	unclassified(100)	unclassified(100)			0	0	0	0	0	0	0	0	0	0	0	0	0	0	0	0	0	0	0	0	0	0	2	0	0	0	0	0	0	0	0	0	0	0	0	0	0	0	0	0
Otu000685	2	unclassified(100)	unclassified(100)	unclassified(100)	unclassified(100)	unclassified(100)			0	0	0	0	0	0	0	0	0	0	0	0	0	0	0	0	1	0	0	0	0	0	0	0	0	1	0	0	0	0	0	0	0	0	0	0	0	0	0	0
Otu000686	2	unclassified(100)	unclassified(100)	unclassified(100)	unclassified(100)	unclassified(100)			0	0	0	0	0	0	0	0	0	0	0	0	0	0	0	0	0	0	1	0	0	0	0	0	0	0	0	0	0	0	0	1	0	0	0	0	0	0	0	0
Otu000687	2	unclassified(100)	unclassified(100)	unclassified(100)	unclassified(100)	unclassified(100)			0	0	0	0	0	0	0	0	0	0	0	0	0	0	0	0	0	0	0	0	2	0	0	0	0	0	0	0	0	0	0	0	0	0	0	0	0	0	0	0
Otu000688	2	Proteobacteria(100)	Gammaproteobacteria(100)	Enterobacteriales(100)	Enterobacteriaceae(100)	unclassified(100)			0	0	0	0	0	0	0	0	0	2	0	0	0	0	0	0	0	0	0	0	0	0	0	0	0	0	0	0	0	0	0	0	0	0	0	0	0	0	0	0
Otu000689	2	Proteobacteria(100)	Gammaproteobacteria(100)	Enterobacteriales(100)	Enterobacteriaceae(100)	unclassified(100)			0	0	0	0	0	0	0	0	0	2	0	0	0	0	0	0	0	0	0	0	0	0	0	0	0	0	0	0	0	0	0	0	0	0	0	0	0	0	0	0
Otu000690	2	Proteobacteria(100)	Gammaproteobacteria(100)	Enterobacteriales(100)	Enterobacteriaceae(100)	unclassified(100)			0	0	0	0	0	0	0	0	0	2	0	0	0	0	0	0	0	0	0	0	0	0	0	0	0	0	0	0	0	0	0	0	0	0	0	0	0	0	0	0
Otu000691	2	Proteobacteria(100)	Gammaproteobacteria(100)	Enterobacteriales(100)	Enterobacteriaceae(100)	unclassified(100)			0	0	0	0	0	1	0	0	0	0	0	0	0	0	0	0	0	0	0	0	0	0	0	0	0	0	0	0	0	0	0	0	0	0	0	1	0	0	0	0
Otu000692	2	Proteobacteria(100)	Gammaproteobacteria(100)	Enterobacteriales(100)	Enterobacteriaceae(100)	unclassified(100)			0	0	0	0	0	0	0	0	0	0	0	0	0	0	0	0	0	0	0	0	0	0	0	0	0	0	0	0	0	0	0	0	0	0	0	0	0	0	0	0
Otu000693	2	Proteobacteria(100)	Gammaproteobacteria(100)	Enterobacteriales(100)	Enterobacteriaceae(100)	unclassified(100)			0	0	0	0	0	0	0	0	0	0	0	0	0	0	0	0	0	0	0	0	0	0	0	0	0	0	0	0	0	0	0	0	0	0	0	0	0	0	0	0
Otu000694	2	Proteobacteria(100)	Gammaproteobacteria(100)	unclassified(100)	unclassified(100)	unclassified(100)			0	0	0	0	0	0	0	0	0	0	0	0	0	0	0	0	0	0	0	0	0	0	0	0	0	0	0	0	0	0	0	0	0	0	0	2	0	0	0	0
Otu000695	2	Proteobacteria(100)	Betaproteobacteria(100)	Burkholderiales(100)	unclassified(100)	unclassified(100)			0	0	0	0	0	0	0	0	0	0	0	0	0	0	0	0	0	0	0	0	0	0	0	0	0	0	0	0	0	0	0	0	0	0	0	2	0	0	0	0
Otu000696	2	Proteobacteria(100)	Betaproteobacteria(100)	Burkholderiales(100)	unclassified(100)	unclassified(100)			0	0	0	0	0	0	0	0	0	0	0	0	0	0	0	0	0	0	0	0	0	0	0	0	0	0	0	0	0	0	0	0	0	0	0	2	0	0	0	0
Otu000697	2	Proteobacteria(100)	Betaproteobacteria(100)	Burkholderiales(100)	unclassified(100)	unclassified(100)			0	0	0	0	0	0	0	0	0	2	0	0	0	0	0	0	0	0	0	0	0	0	0	0	0	0	0	0	0	0	0	0	0	0	0	0	0	0	0	0
Otu000698	2	Bacteroidetes(100)	unclassified(100)	unclassified(100)	unclassified(100)	unclassified(100)			0	0	0	0	0	0	0	0	0	2	0	0	0	0	0	0	0	0	0	0	0	0	0	0	0	0	0	0	0	0	0	0	0	0	0	0	0	0	0	0
Otu000699	2	Proteobacteria(100)	Gammaproteobacteria(100)	unclassified(100)	unclassified(100)	unclassified(100)			0	0	0	0	0	0	0	0	0	2	0	0	0	0	0	0	0	0	0	0	0	0	0	0	0	0	0	0	0	0	0	0	0	0	0	0	0	0	0	0
Otu000700	2	Proteobacteria(100)	Gammaproteobacteria(100)	unclassified(100)	unclassified(100)	unclassified(100)			0	0	0	0	0	0	0	0	0	2	0	0	0	0	0	0	0	0	0	0	0	0	0	0	0	0	0	0	0	0	0	0	0	0	0	0	0	0	0	0
Otu000701	2	Proteobacteria(100)	Gammaproteobacteria(100)	unclassified(100)	unclassified(100)	unclassified(100)			0	0	0	0	0	0	0	0	0	2	0	0	0	0	0	0	0	0	0	0	0	0	0	0	0	0	0	0	0	0	0	0	0	0	0	0	0	0	0	0
Otu000702	2	Proteobacteria(100)	Gammaproteobacteria(100)	unclassified(100)	unclassified(100)	unclassified(100)			0	0	0	0	0	0	0	0	0	2	0	0	0	0	0	0	0	0	0	0	0	0	0	0	0	0	0	0	0	0	0	0	0	0	0	0	0	0	0	0
Otu000703	2	Proteobacteria(100)	Gammaproteobacteria(100)	unclassified(100)	unclassified(100)	unclassified(100)			0	0	0	0	0	0	0	0	0	0	0	0	0	0	2	0	0	0	0	0	0	0	0	0	0	0	0	0	0	0	0	0	0	0	0	0	0	0	0	0
Otu000704	2	Proteobacteria(100)	Gammaproteobacteria(100)	unclassified(100)	unclassified(100)	unclassified(100)			0	0	0	0	0	0	0	0	0	2	0	0	0	0	0	0	0	0	0	0	0	0	0	0	0	0	0	0	0	0	0	0	0	0	0	0	0	0	0	0
Otu000705	2	Proteobacteria(100)	Gammaproteobacteria(100)	Enterobacteriales(100)	Enterobacteriaceae(100)	unclassified(100)			0	0	0	0	0	0	0	0	0	2	0	0	0	0	0	0	0	0	0	0	0	0	0	0	0	0	0	0	0	0	0	0	0	0	0	0	0	0	0	0
Otu000706	2	Proteobacteria(100)	Gammaproteobacteria(100)	unclassified(100)	unclassified(100)	unclassified(100)			0	0	0	0	0	0	0	0	0	0	0	0	0	0	2	0	0	0	0	0	0	0	0	0	0	0	0	0	0	0	0	0	0	0	0	0	0	0	0	0
Otu000707	2	Proteobacteria(100)	Gammaproteobacteria(100)	unclassified(100)	unclassified(100)	unclassified(100)			0	0	0	0	0	0	0	0	0	0	0	0	0	0	0	0	0	0	0	0	0	1	0	0	0	0	0	0	0	0	0	0	0	0	0	1	0	0	0	0
Otu000708	2	unclassified(100)	unclassified(100)	unclassified(100)	unclassified(100)	unclassified(100)			0	0	0	0	0	0	0	0	0	0	0	0	0	0	0	0	0	0	0	0	0	0	0	0	0	0	0	0	0	0	0	0	0	0	0	0	0	0	0	0
Otu000709	2	unclassified(100)	unclassified(100)	unclassified(100)	unclassified(100)	unclassified(100)			0	0	0	0	0	0	0	0	1	0	0	1	0	0	0	0	0	0	0	0	0	0	0	0	0	0	0	0	0	0	0	0	0	0	0	0	0	0	0	0
Otu000710	2	unclassified(100)	unclassified(100)	unclassified(100)	unclassified(100)	unclassified(100)			0	0	0	0	0	0	0	0	0	0	0	0	0	0	0	0	0	0	0	0	0	0	0	0	0	0	0	0	0	0	0	0	0	0	0	0	0	0	0	0
Otu000711	2	unclassified(100)	unclassified(100)	unclassified(100)	unclassified(100)	unclassified(100)			0	0	0	0	0	0	0	0	0	0	0	0	0	0	0	0	0	0	0	0	2	0	0	0	0	0	0	0	0	0	0	0	0	0	0	0	0	0	0	0
Otu000712	2	unclassified(100)	unclassified(100)	unclassified(100)	unclassified(100)	unclassified(100)			0	0	0	0	0	0	0	0	0	0	0	0	0	0	0	0	0	0	0	0	2	0	0	0	0	0	0	0	0	0	0	0	0	0	0	0	0	0	0	0
Otu000713	2	unclassified(100)	unclassified(100)	unclassified(100)	unclassified(100)	unclassified(100)			0	0	0	0	0	0	0	0	0	0	0	0	0	0	1	0	0	0	0	0	0	0	0	0	0	0	0	0	0	0	0	0	0	0	0	1	0	0	0	0
Otu000714	2	unclassified(100)	unclassified(100)	unclassified(100)	unclassified(100)	unclassified(100)			0	0	0	0	0	0	0	0	0	0	0	0	0	0	0	0	0	0	0	0	0	0	0	2	0	0	0	0	0	0	0	0	0	0	0	0	0	0	0	0
Otu000715	2	unclassified(100)	unclassified(100)	unclassified(100)	unclassified(100)	unclassified(100)			0	0	0	0	0	0	0	0	0	0	0	0	0	0	0	0	0	0	0	0	0	0	0	1	0	0	0	0	0	0	0	0	0	0	1	0	0	0	0	0
Otu000716	2	Proteobacteria(100)	Gammaproteobacteria(100)	Xanthomonadales(100)	Xanthomonadaceae(100)	Stenotrophomonas(100)			0	0	0	0	0	0	0	0	0	0	0	0	0	0	2	0	0	0	0	0	0	0	0	0	0	0	0	0	0	0	0	0	0	0	0	0	0	0	0	0
Otu000717	2	Acidobacteria(100)	Acidobacteria_Gp6(100)	Gp6(100)	unclassified(100)	unclassified(100)			0	0	0	0	0	0	0	0	0	0	0	0	0	0	0	0	0	0	0	0	0	0	0	0	0	0	0	0	0	0	0	0	2	0	0	0	0	0	0	0
Otu000718	2	Fusobacteria(100)	Fusobacteriia(100)	Fusobacteriales(100)	Leptotrichiaceae(100)	Leptotrichia(100)			0	0	0	0	0	0	0	0	0	0	0	0	0	0	0	0	0	0	0	0	0	0	0	0	0	0	0	0	0	0	0	0	0	0	2	0	0	0	0	0
Otu000719	2	Actinobacteria(100)	Actinobacteria(100)	Bifidobacteriales(100)	Bifidobacteriaceae(100)	Scardovia(100)			0	0	0	0	0	0	0	0	0	0	0	0	0	0	2	0	0	0	0	0	0	0	0	0	0	0	0	0	0	0	0	0	0	0	0	0	0	0	0	0
Otu000720	2	Firmicutes(100)	Negativicutes(100)	Selenomonadales(100)	Veillonellaceae(100)	Veillonella(100)			0	0	0	0	0	0	0	0	2	0	0	0	0	0	0	0	0	0	0	0	0	0	0	0	0	0	0	0	0	0	0	0	0	0	0	0	0	0	0	0
Otu000721	2	Firmicutes(100)	Negativicutes(100)	Selenomonadales(100)	Veillonellaceae(100)	Veillonella(100)			0	0	0	0	0	0	0	0	0	0	0	0	0	0	2	0	0	0	0	0	0	0	0	0	0	0	0	0	0	0	0	0	0	0	0	0	0	0	0	0
Otu000722	2	Firmicutes(100)	Negativicutes(100)	Selenomonadales(100)	Veillonellaceae(100)	unclassified(100)			0	0	0	0	0	0	0	0	0	0	0	0	0	0	0	0	0	2	0	0	0	0	0	0	0	0	0	0	0	0	0	0	0	0	0	0	0	0	0	0
Otu000723	2	Firmicutes(100)	Negativicutes(100)	Selenomonadales(100)	Veillonellaceae(100)	Veillonella(100)			0	0	0	0	0	0	0	0	0	0	0	0	0	0	2	0	0	0	0	0	0	0	0	0	0	0	0	0	0	0	0	0	0	0	0	0	0	0	0	0
Otu000724	2	Firmicutes(100)	Negativicutes(100)	Selenomonadales(100)	Veillonellaceae(100)	Veillonella(100)			0	0	0	0	0	0	0	0	0	0	0	0	0	0	0	0	0	1	0	0	0	0	0	0	1	0	0	0	0	0	0	0	0	0	0	0	0	0	0	0
Otu000725	2	Proteobacteria(100)	Gammaproteobacteria(100)	Xanthomonadales(100)	Xanthomonadaceae(100)	Stenotrophomonas(100)			0	0	0	0	0	0	0	0	0	0	0	0	0	0	2	0	0	0	0	0	0	0	0	0	0	0	0	0	0	0	0	0	0	0	0	0	0	0	0	0
Otu000726	2	Proteobacteria(100)	Gammaproteobacteria(100)	Xanthomonadales(100)	Xanthomonadaceae(100)	unclassified(100)			0	0	0	0	0	0	0	0	0	0	0	0	0	0	2	0	0	0	0	0	0	0	0	0	0	0	0	0	0	0	0	0	0	0	0	0	0	0	0	0
Otu000727	2	Proteobacteria(100)	Gammaproteobacteria(100)	Enterobacteriales(100)	Enterobacteriaceae(100)	unclassified(100)			0	0	0	0	0	0	0	0	0	2	0	0	0	0	0	0	0	0	0	0	0	0	0	0	0	0	0	0	0	0	0	0	0	0	0	0	0	0	0	0
Otu000728	2	Proteobacteria(100)	Gammaproteobacteria(100)	Xanthomonadales(100)	Xanthomonadaceae(100)	unclassified(100)			0	0	0	0	0	0	0	0	0	0	0	0	0	0	0	0	0	0	0	0	2	0	0	0	0	0	0	0	0	0	0	0	0	0	0	0	0	0	0	0
Otu000729	2	Proteobacteria(100)	Gammaproteobacteria(100)	Xanthomonadales(100)	Xanthomonadaceae(100)	Stenotrophomonas(100)			0	0	0	0	0	0	0	0	0	0	0	0	0	0	2	0	0	0	0	0	0	0	0	0	0	0	0	0	0	0	0	0	0	0	0	0	0	0	0	0
Otu000730	2	Proteobacteria(100)	Gammaproteobacteria(100)	Xanthomonadales(100)	Xanthomonadaceae(100)	unclassified(100)			0	0	0	0	0	0	0	0	0	2	0	0	0	0	0	0	0	0	0	0	0	0	0	0	0	0	0	0	0	0	0	0	0	0	0	0	0	0	0	0
Otu000731	2	Proteobacteria(100)	Gammaproteobacteria(100)	Xanthomonadales(100)	Xanthomonadaceae(100)	unclassified(100)			0	0	0	0	0	0	0	0	0	2	0	0	0	0	0	0	0	0	0	0	0	0	0	0	0	0	0	0	0	0	0	0	0	0	0	0	0	0	0	0
Otu000732	2	Proteobacteria(100)	Gammaproteobacteria(100)	Xanthomonadales(100)	Xanthomonadaceae(100)	Stenotrophomonas(100)			0	0	0	0	0	0	0	0	0	0	0	0	0	0	0	0	0	0	0	0	2	0	0	0	0	0	0	0	0	0	0	0	0	0	0	0	0	0	0	0
Otu000733	2	Proteobacteria(100)	Betaproteobacteria(100)	Neisseriales(100)	Neisseriaceae(100)	unclassified(100)			0	0	0	0	0	0	0	0	0	0	0	0	0	0	0	0	0	0	0	0	0	0	0	0	0	0	0	0	0	0	0	0	0	0	0	0	0	0	2	0
Otu000734	2	Proteobacteria(100)	Betaproteobacteria(100)	Neisseriales(100)	Neisseriaceae(100)	Morococcus(100)			0	0	0	0	0	0	0	0	0	0	0	0	0	0	0	0	0	0	0	0	0	0	0	0	2	0	0	0	0	0	0	0	0	0	0	0	0	0	0	0
Otu000735	2	Proteobacteria(100)	Betaproteobacteria(100)	Neisseriales(100)	Neisseriaceae(100)	unclassified(100)			0	0	0	0	0	0	0	0	0	0	0	0	0	0	0	0	0	0	0	0	0	0	0	0	2	0	0	0	0	0	0	0	0	0	0	0	0	0	0	0
Otu000736	2	Proteobacteria(100)	Betaproteobacteria(100)	Neisseriales(100)	Neisseriaceae(100)	Morococcus(100)			0	0	0	0	0	0	0	0	0	0	0	0	0	0	0	0	0	0	0	0	0	0	0	0	1	0	0	0	0	0	0	0	0	0	0	0	0	0	1	0
Otu000737	2	Bacteroidetes(100)	Bacteroidia(100)	Bacteroidales(100)	Rikenellaceae(100)	Alistipes(100)			0	0	0	0	0	0	0	0	0	0	0	2	0	0	0	0	0	0	0	0	0	0	0	0	0	0	0	0	0	0	0	0	0	0	0	0	0	0	0	0
Otu000738	2	Proteobacteria(100)	Gammaproteobacteria(100)	Enterobacteriales(100)	Enterobacteriaceae(100)	unclassified(100)			0	0	0	0	0	0	0	0	0	2	0	0	0	0	0	0	0	0	0	0	0	0	0	0	0	0	0	0	0	0	0	0	0	0	0	0	0	0	0	0
Otu000739	2	Proteobacteria(100)	Gammaproteobacteria(100)	Enterobacteriales(100)	Enterobacteriaceae(100)	unclassified(100)			0	1	0	0	0	0	0	0	0	0	0	0	0	0	0	0	0	0	0	0	0	0	0	0	0	0	0	0	0	0	0	0	0	0	0	0	0	0	0	0
Otu000740	2	Proteobacteria(100)	Gammaproteobacteria(100)	Enterobacteriales(100)	Enterobacteriaceae(100)	unclassified(100)			0	0	0	1	0	0	0	0	0	0	0	0	0	0	0	0	0	0	0	0	0	0	0	0	0	0	0	0	0	0	0	0	0	0	0	0	0	0	0	0
Otu000741	2	Proteobacteria(100)	Gammaproteobacteria(100)	Enterobacteriales(100)	Enterobacteriaceae(100)	unclassified(100)			0	0	0	0	0	0	0	0	0	2	0	0	0	0	0	0	0	0	0	0	0	0	0	0	0	0	0	0	0	0	0	0	0	0	0	0	0	0	0	0
Otu000742	2	Proteobacteria(100)	Gammaproteobacteria(100)	Enterobacteriales(100)	Enterobacteriaceae(100)	unclassified(100)			0	0	0	0	0	0	0	0	0	2	0	0	0	0	0	0	0	0	0	0	0	0	0	0	0	0	0	0	0	0	0	0	0	0	0	0	0	0	0	0
Otu000743	2	Proteobacteria(100)	Gammaproteobacteria(100)	Enterobacteriales(100)	Enterobacteriaceae(100)	unclassified(100)			0	0	0	0	0	0	0	0	0	1	0	0	0	0	0	0	0	0	0	0	0	0	0	0	0	0	0	0	0	0	0	0	0	0	0	0	1	0	0	0
Otu000744	2	Proteobacteria(100)	Gammaproteobacteria(100)	Enterobacteriales(100)	Enterobacteriaceae(100)	unclassified(100)			0	0	0	0	0	0	0	0	0	2	0	0	0	0	0	0	0	0	0	0	0	0	0	0	0	0	0	0	0	0	0	0	0	0	0	0	0	0	0	0
Otu000745	2	Proteobacteria(100)	Gammaproteobacteria(100)	Enterobacteriales(100)	Enterobacteriaceae(100)	unclassified(100)			0	0	0	0	0	0	0	0	0	2	0	0	0	0	0	0	0	0	0	0	0	0	0	0	0	0	0	0	0	0	0	0	0	0	0	0	0	0	0	0
Otu000746	2	Proteobacteria(100)	Gammaproteobacteria(100)	Enterobacteriales(100)	Enterobacteriaceae(100)	unclassified(100)			0	0	0	0	0	0	0	0	0	2	0	0	0	0	0	0	0	0	0	0	0	0	0	0	0	0	0	0	0	0	0	0	0	0	0	0	0	0	0	0
Otu000747	2	Proteobacteria(100)	Gammaproteobacteria(100)	Enterobacteriales(100)	Enterobacteriaceae(100)	unclassified(100)			0	0	0	0	0	0	0	0	0	2	0	0	0	0	0	0	0	0	0	0	0	0	0	0	0	0	0	0	0	0	0	0	0	0	0	0	0	0	0	0
Otu000748	2	Proteobacteria(100)	Gammaproteobacteria(100)	Enterobacteriales(100)	Enterobacteriaceae(100)	unclassified(100)			0	0	0	0	0	0	0	0	0	1	0	0	0	0	0	0	0	0	0	0	0	0	0	0	0	0	0	0	0	0	0	0	0	0	0	1	0	0	0	0
Otu000749	2	Proteobacteria(100)	Betaproteobacteria(100)	Burkholderiales(100)	Oxalobacteraceae(100)	unclassified(100)			0	0	0	0	0	0	0	0	0	0	0	1	0	0	0	1	0	0	0	0	0	0	0	0	0	0	0	0	0	0	0	0	0	0	0	0	0	0	0	0
Otu000750	2	Proteobacteria(100)	Gammaproteobacteria(100)	Enterobacteriales(100)	Enterobacteriaceae(100)	unclassified(100)			0	0	0	0	0	0	0	0	0	1	0	0	0	0	0	0	0	0	0	0	0	0	0	0	0	0	0	0	0	0	0	0	0	0	0	1	0	0	0	0
Otu000751	2	Proteobacteria(100)	Gammaproteobacteria(100)	Enterobacteriales(100)	Enterobacteriaceae(100)	unclassified(100)			0	0	0	0	0	0	0	0	0	1	0	0	0	0	0	0	0	0	0	0	0	0	0	0	0	0	0	0	0	0	0	0	0	0	0	1	0	0	0	0
Otu000752	2	Proteobacteria(100)	Gammaproteobacteria(100)	Enterobacteriales(100)	Enterobacteriaceae(100)	unclassified(100)			0	0	0	0	0	0	0	0	0	1	0	0	0	0	0	0	0	0	0	0	0	0	0	0	0	0	0	0	0	0	0	0	0	0	0	1	0	0	0	0
Otu000753	2	Proteobacteria(100)	Gammaproteobacteria(100)	Enterobacteriales(100)	Enterobacteriaceae(100)	unclassified(100)			0	0	0	0	0	0	0	0	0	2	0	0	0	0	0	0	0	0	0	0	0	0	0	0	0	0	0	0	0	0	0	0	0	0	0	0	0	0	0	0
Otu000754	2	Proteobacteria(100)	Gammaproteobacteria(100)	Enterobacteriales(100)	Enterobacteriaceae(100)	unclassified(100)			0	0	0	0	0	0	0	0	0	1	0	0	0	0	0	0	0	0	0	0	0	1	0	0	0	0	0	0	0	0	0	0	0	0	0	0	0	0	0	0
Otu000755	2	Proteobacteria(100)	Gammaproteobacteria(100)	Enterobacteriales(100)	Enterobacteriaceae(100)	unclassified(100)			0	0	0	0	0	0	0	0	0	0	0	0	0	0	0	0	0	0	0	0	0	0	0	0	0	0	0	0	0	0	0	0	0	0	0	0	0	0	0	0
Otu000756	2	Proteobacteria(100)	Gammaproteobacteria(100)	Enterobacteriales(100)	Enterobacteriaceae(100)	unclassified(100)			0	0	0	0	0	0	0	0	0	2	0	0	0	0	0	0	0	0	0	0	0	0	0	0	0	0	0	0	0	0	0	0	0	0	0	0	0	0	0	0
Otu000757	2	Proteobacteria(100)	Gammaproteobacteria(100)	Enterobacteriales(100)	Enterobacteriaceae(100)	unclassified(100)			0	0	0	1	0	0	0	0	0	0	0	0	0	0	0	0	0	0	0	0	0	0	0	0	0	0	0	0	0	0	0	0	0	0	0	0	0	0	0	0
Otu000758	2	Proteobacteria(100)	Gammaproteobacteria(100)	Enterobacteriales(100)	Enterobacteriaceae(100)	unclassified(100)			0	0	0	0	0	0	0	0	0	2	0	0	0	0	0	0	0	0	0	0	0	0	0	0	0	0	0	0	0	0	0	0	0	0	0	0	0	0	0	0
Otu000759	2	Proteobacteria(100)	Gammaproteobacteria(100)	Pseudomonadales(100)	Moraxellaceae(100)	Acinetobacter(100)			0	0	0	0	0	0	0	0	0	0	0	0	0	0	0	0	0	0	0	0	0	0	0	1	0	0	0	0	0	0	0	0	0	0	0	1	0	0	0	0
Otu000760	2	Proteobacteria(100)	Gammaproteobacteria(100)	Pseudomonadales(100)	Moraxellaceae(100)	unclassified(100)			0	0	0	0	0	0	0	0	0	0	0	0	0	0	0	0	0	0	0	0	0	0	0	1	0	0	0	0	0	0	0	0	0	0	0	1	0	0	0	0
Otu000761	2	Proteobacteria(100)	Gammaproteobacteria(100)	Pseudomonadales(100)	Moraxellaceae(100)	Acinetobacter(100)			0	0	0	0	0	0	0	0	0	0	0	0	0	0	0	0	0	0	0	0	0	0	0	2	0	0	0	0	0	0	0	0	0	0	0	0	0	0	0	0
Otu000762	2	Proteobacteria(100)	Gammaproteobacteria(100)	Pseudomonadales(100)	Moraxellaceae(100)	Acinetobacter(100)			0	0	0	0	0	0	0	0	0	0	0	0	0	0	0	0	0	0	0	0	0	0	0	1	0	0	0	0	0	0	0	0	0	0	0	1	0	0	0	0
Otu000763	2	Proteobacteria(100)	Gammaproteobacteria(100)	Pseudomonadales(100)	Moraxellaceae(100)	Acinetobacter(100)			0	0	0	0	0	0	0	0	0	0	0	0	0	0	0	0	0	0	0	0	0	0	0	2	0	0	0	0	0	0	0	0	0	0	0	0	0	0	0	0
Otu000764	2	Proteobacteria(100)	Gammaproteobacteria(100)	Pseudomonadales(100)	Moraxellaceae(100)	Acinetobacter(100)			0	0	0	0	0	0	0	0	0	0	0	0	0	0	0	0	0	0	0	0	0	0	0	2	0	0	0	0	0	0	0	0	0	0	0	0	0	0	0	0
Otu000765	2	Proteobacteria(100)	Gammaproteobacteria(100)	Pseudomonadales(100)	Moraxellaceae(100)	Enhydrobacter(100)			0	0	0	0	0	0	0	0	0	0	0	1	0	0	0	0	0	0	0	0	0	1	0	0	0	0	0	0	0	0	0	0	0	0	0	0	0	0	0	0
Otu000766	2	Proteobacteria(100)	Gammaproteobacteria(100)	Pseudomonadales(100)	Moraxellaceae(100)	Acinetobacter(100)			0	0	0	0	0	0	0	0	0	0	0	0	0	0	1	0	0	0	0	0	0	0	0	0	0	0	0	0	0	0	0	0	0	0	0	1	0	0	0	0
Otu000767	2	Proteobacteria(100)	Gammaproteobacteria(100)	Pseudomonadales(100)	Moraxellaceae(100)	Acinetobacter(100)			0	0	0	0	0	0	0	0	0	0	0	0	0	0	0	0	0	0	0	0	0	0	0	0	0	0	0	0	0	0	0	0	0	0	2	0	0	0	0	0
Otu000768	2	Proteobacteria(100)	Gammaproteobacteria(100)	Pseudomonadales(100)	Moraxellaceae(100)	Acinetobacter(100)			0	0	0	0	0	0	0	0	0	0	0	0	0	0	0	0	0	0	0	0	0	0	0	2	0	0	0	0	0	0	0	0	0	0	0	0	0	0	0	0
Otu000769	2	Proteobacteria(100)	Gammaproteobacteria(100)	Pseudomonadales(100)	Moraxellaceae(100)	unclassified(100)			0	0	0	0	0	0	0	0	0	0	0	0	0	0	0	0	0	0	0	0	2	0	0	0	0	0	0	0	0	0	0	0	0	0	0	0	0	0	0	0
Otu000770	2	Proteobacteria(100)	Gammaproteobacteria(100)	Pseudomonadales(100)	Moraxellaceae(100)	Acinetobacter(100)			0	0	0	1	0	0	0	0	0	0	0	0	0	0	0	0	0	0	0	0	0	0	0	1	0	0	0	0	0	0	0	0	0	0	0	0	0	0	0	0
Otu000771	2	Proteobacteria(100)	Gammaproteobacteria(100)	Pseudomonadales(100)	Moraxellaceae(100)	Acinetobacter(100)			0	0	0	0	0	0	0	0	0	0	0	0	0	0	0	0	0	0	0	0	0	0	0	1	0	0	0	0	0	0	0	0	0	0	0	1	0	0	0	0
Otu000772	2	Proteobacteria(100)	Gammaproteobacteria(100)	Pseudomonadales(100)	Moraxellaceae(100)	Acinetobacter(100)			0	0	0	0	0	0	0	0	0	0	0	0	0	0	0	0	0	0	0	0	0	0	0	2	0	0	0	0	0	0	0	0	0	0	0	0	0	0	0	0
Otu000773	2	Proteobacteria(100)	Gammaproteobacteria(100)	Pseudomonadales(100)	Moraxellaceae(100)	Acinetobacter(100)			0	0	0	0	0	0	0	0	0	0	0	0	0	0	0	0	0	0	0	0	2	0	0	0	0	0	0	0	0	0	0	0	0	0	0	0	0	0	0	0
Otu000774	2	Proteobacteria(100)	Gammaproteobacteria(100)	Pseudomonadales(100)	Moraxellaceae(100)	Acinetobacter(100)			0	0	0	0	0	0	0	0	0	0	0	0	0	0	0	0	0	0	0	0	0	0	0	1	0	0	0	0	0	0	0	0	0	0	1	0	0	0	0	0
Otu000775	2	Proteobacteria(100)	Gammaproteobacteria(100)	Pseudomonadales(100)	Moraxellaceae(100)	Acinetobacter(100)			0	0	0	0	0	0	0	0	0	0	0	0	0	0	0	0	0	0	0	0	0	0	0	2	0	0	0	0	0	0	0	0	0	0	0	0	0	0	0	0
Otu000776	2	Proteobacteria(100)	Gammaproteobacteria(100)	Pseudomonadales(100)	Moraxellaceae(100)	unclassified(100)			0	0	0	0	0	0	0	0	0	0	0	0	0	0	0	0	0	1	0	0	1	0	0	0	0	0	0	0	0	0	0	0	0	0	0	0	0	0	0	0
Otu000777	2	Proteobacteria(100)	Gammaproteobacteria(100)	Pseudomonadales(100)	Moraxellaceae(100)	Acinetobacter(100)			0	0	0	0	0	0	0	0	0	0	0	0	0	0	0	0	0	0	0	0	0	0	0	1	0	0	0	0	0	0	1	0	0	0	0	0	0	0	0	0
Otu000778	2	Proteobacteria(100)	Gammaproteobacteria(100)	Pseudomonadales(100)	Moraxellaceae(100)	Acinetobacter(100)			0	0	0	0	0	0	0	0	0	0	0	0	0	0	1	0	0	0	0	0	0	0	0	0	0	0	0	0	0	0	0	0	0	0	0	1	0	0	0	0
Otu000779	2	Proteobacteria(100)	Gammaproteobacteria(100)	Pseudomonadales(100)	Moraxellaceae(100)	Acinetobacter(100)			0	0	0	0	0	0	0	0	0	0	0	0	0	0	0	0	0	0	0	0	0	0	0	0	0	0	0	0	0	0	0	0	0	0	0	2	0	0	0	0
Otu000780	2	Proteobacteria(100)	Gammaproteobacteria(100)	Pseudomonadales(100)	Moraxellaceae(100)	Acinetobacter(100)			0	0	0	0	0	0	0	0	0	0	0	0	0	0	0	0	0	0	0	0	2	0	0	0	0	0	0	0	0	0	0	0	0	0	0	0	0	0	0	0
Otu000781	2	Proteobacteria(100)	Gammaproteobacteria(100)	Pseudomonadales(100)	Moraxellaceae(100)	Acinetobacter(100)			0	0	0	0	0	0	0	0	0	0	0	0	0	0	0	0	0	0	0	0	0	0	0	0	0	0	0	0	0	0	0	0	0	0	0	2	0	0	0	0
Otu000782	2	Proteobacteria(100)	Gammaproteobacteria(100)	Pseudomonadales(100)	Moraxellaceae(100)	Acinetobacter(100)			0	0	0	0	0	0	0	0	0	0	0	0	0	0	0	0	0	0	0	0	0	0	0	0	0	0	0	0	0	0	0	0	0	0	0	2	0	0	0	0
Otu000783	2	Proteobacteria(100)	Gammaproteobacteria(100)	Pseudomonadales(100)	Moraxellaceae(100)	Acinetobacter(100)			0	0	0	0	0	0	0	0	0	0	0	0	0	0	0	0	0	0	0	0	0	0	0	1	0	0	0	0	0	0	0	0	0	0	0	1	0	0	0	0
Otu000784	2	Proteobacteria(100)	Gammaproteobacteria(100)	Pseudomonadales(100)	Moraxellaceae(100)	unclassified(100)			0	0	0	0	0	0	0	0	0	0	0	0	0	0	0	0	0	0	0	0	1	0	0	0	0	0	0	1	0	0	0	0	0	0	0	0	0	0	0	0
Otu000785	2	Proteobacteria(100)	Gammaproteobacteria(100)	Pseudomonadales(100)	Moraxellaceae(100)	unclassified(100)			0	0	0	0	0	0	0	0	0	0	0	0	0	0	0	0	0	0	0	0	0	0	0	2	0	0	0	0	0	0	0	0	0	0	0	0	0	0	0	0
Otu000786	2	Proteobacteria(100)	Gammaproteobacteria(100)	Pseudomonadales(100)	Moraxellaceae(100)	unclassified(100)			0	0	0	0	0	0	0	0	0	0	0	0	0	0	0	0	0	0	0	0	0	0	0	2	0	0	0	0	0	0	0	0	0	0	0	0	0	0	0	0
Otu000787	2	Proteobacteria(100)	Gammaproteobacteria(100)	Pseudomonadales(100)	Moraxellaceae(100)	Enhydrobacter(100)			0	0	0	0	0	0	0	0	0	0	0	0	0	0	0	0	0	0	0	0	0	1	0	0	0	0	0	0	0	0	0	0	0	0	0	1	0	0	0	0
Otu000788	2	Proteobacteria(100)	Gammaproteobacteria(100)	Pseudomonadales(100)	Moraxellaceae(100)	Acinetobacter(100)			0	0	0	0	0	0	0	0	0	0	0	0	0	0	0	0	0	0	0	0	0	0	0	1	0	0	0	0	0	0	0	0	0	0	1	0	0	0	0	0
Otu000789	2	Proteobacteria(100)	Gammaproteobacteria(100)	Pseudomonadales(100)	Moraxellaceae(100)	Acinetobacter(100)			0	0	0	0	0	0	0	0	0	0	0	0	0	0	0	0	0	0	0	0	0	0	0	0	0	0	0	0	0	0	0	0	0	0	1	1	0	0	0	0
Otu000790	2	Proteobacteria(100)	Gammaproteobacteria(100)	Pseudomonadales(100)	Moraxellaceae(100)	Acinetobacter(100)			0	0	0	0	0	0	0	0	0	0	0	0	0	0	0	0	0	0	0	0	0	0	0	2	0	0	0	0	0	0	0	0	0	0	0	0	0	0	0	0
Otu000791	2	Proteobacteria(100)	Gammaproteobacteria(100)	Pseudomonadales(100)	Moraxellaceae(100)	Acinetobacter(100)			0	0	0	0	0	0	0	0	0	0	0	0	0	0	0	0	0	0	0	0	0	0	0	1	0	0	0	0	0	0	0	0	0	0	1	0	0	0	0	0
Otu000792	2	Proteobacteria(100)	Gammaproteobacteria(100)	Pseudomonadales(100)	Moraxellaceae(100)	Acinetobacter(100)			0	0	0	0	0	0	0	0	0	0	0	0	0	0	0	0	0	0	0	0	0	0	0	2	0	0	0	0	0	0	0	0	0	0	0	0	0	0	0	0
Otu000793	2	Proteobacteria(100)	Gammaproteobacteria(100)	Pseudomonadales(100)	Moraxellaceae(100)	Acinetobacter(100)			0	0	0	0	0	0	0	0	0	0	0	0	0	0	0	0	0	0	0	0	2	0	0	0	0	0	0	0	0	0	0	0	0	0	0	0	0	0	0	0
Otu000794	2	Proteobacteria(100)	Gammaproteobacteria(100)	Pseudomonadales(100)	Pseudomonadaceae(100)	unclassified(100)			0	0	0	0	0	0	0	0	0	0	0	0	0	0	0	0	0	0	0	0	0	1	0	0	0	0	0	0	0	0	0	0	0	0	0	0	0	0	0	1
Otu000795	2	Proteobacteria(100)	Gammaproteobacteria(100)	Pseudomonadales(100)	Moraxellaceae(100)	Acinetobacter(100)			0	0	0	0	0	0	0	0	0	0	0	0	0	0	0	0	0	0	0	0	0	0	0	0	0	0	0	0	0	0	0	0	0	0	0	2	0	0	0	0
Otu000796	2	Proteobacteria(100)	Gammaproteobacteria(100)	Pseudomonadales(100)	Moraxellaceae(100)	unclassified(100)			0	0	0	0	0	0	0	0	0	0	0	0	0	0	2	0	0	0	0	0	0	0	0	0	0	0	0	0	0	0	0	0	0	0	0	0	0	0	0	0
Otu000797	2	Proteobacteria(100)	Gammaproteobacteria(100)	Pseudomonadales(100)	Moraxellaceae(100)	Acinetobacter(100)			0	0	0	0	0	0	0	0	0	0	0	0	0	0	0	0	0	0	0	0	0	0	0	2	0	0	0	0	0	0	0	0	0	0	0	0	0	0	0	0
Otu000798	2	Proteobacteria(100)	Gammaproteobacteria(100)	Pseudomonadales(100)	Moraxellaceae(100)	Acinetobacter(100)			0	0	0	0	0	0	0	0	0	0	0	0	0	0	0	0	0	0	0	0	0	0	0	1	0	0	0	0	0	0	0	0	0	0	0	1	0	0	0	0
Otu000799	2	Proteobacteria(100)	Gammaproteobacteria(100)	Pseudomonadales(100)	Moraxellaceae(100)	Acinetobacter(100)			0	0	0	0	0	0	0	0	0	0	0	0	0	0	0	0	0	0	0	0	0	0	0	0	0	0	0	0	0	0	0	0	0	0	2	0	0	0	0	0
Otu000800	2	Proteobacteria(100)	Gammaproteobacteria(100)	Pseudomonadales(100)	Moraxellaceae(100)	Acinetobacter(100)			0	0	0	0	0	0	0	0	0	0	0	0	0	0	0	0	0	0	0	0	0	0	0	0	0	0	0	0	0	0	0	0	0	0	1	1	0	0	0	0
Otu000801	2	Proteobacteria(100)	Gammaproteobacteria(100)	Pseudomonadales(100)	Moraxellaceae(100)	Acinetobacter(100)			0	0	0	0	0	0	0	0	0	0	0	0	0	0	1	0	0	0	0	0	0	0	0	0	0	0	0	0	0	0	0	0	0	0	0	1	0	0	0	0
Otu000802	2	Proteobacteria(100)	Gammaproteobacteria(100)	Pseudomonadales(100)	Moraxellaceae(100)	Acinetobacter(100)			0	0	0	0	0	0	0	0	0	0	0	0	0	0	0	0	0	0	0	0	0	0	0	2	0	0	0	0	0	0	0	0	0	0	0	0	0	0	0	0
Otu000803	2	Actinobacteria(100)	Actinobacteria(100)	Actinomycetales(100)	Brevibacteriaceae(100)	Brevibacterium(100)			0	0	0	0	0	0	0	0	0	0	0	0	0	0	0	0	0	0	0	0	0	0	0	0	0	0	0	0	0	2	0	0	0	0	0	0	0	0	0	0
Otu000804	2	Actinobacteria(100)	Actinobacteria(100)	Actinomycetales(100)	Propionibacteriaceae(100)	Propionibacterium(100)			0	0	0	0	0	0	0	0	0	0	0	0	0	0	0	0	0	0	1	0	0	1	0	0	0	0	0	0	0	0	0	0	0	0	0	0	0	0	0	0
Otu000805	2	Actinobacteria(100)	Actinobacteria(100)	Actinomycetales(100)	Actinomycetaceae(100)	Actinomyces(100)			0	0	0	0	0	0	0	0	0	0	0	0	0	0	0	0	0	0	0	0	0	0	1	0	0	0	0	0	0	0	0	0	0	0	1	0	0	0	0	0
Otu000806	2	Actinobacteria(100)	Actinobacteria(100)	Actinomycetales(100)	unclassified(100)	unclassified(100)			0	0	0	0	0	0	0	0	0	0	0	0	0	0	0	0	0	0	0	0	0	1	0	0	0	0	0	0	0	1	0	0	0	0	0	0	0	0	0	0
Otu000807	2	Actinobacteria(100)	Actinobacteria(100)	Actinomycetales(100)	Actinomycetaceae(100)	Actinomyces(100)			0	0	0	0	0	0	0	0	0	0	0	0	0	0	0	0	0	0	0	0	0	0	0	0	0	0	0	0	0	0	0	0	0	0	2	0	0	0	0	0
Otu000808	2	Actinobacteria(100)	Actinobacteria(100)	Actinomycetales(100)	Propionibacteriaceae(100)	Propionibacterium(100)			0	0	0	0	0	0	0	0	0	0	0	0	0	0	0	0	1	0	0	0	0	0	0	0	0	0	0	0	0	0	0	0	0	0	0	0	1	0	0	0
Otu000809	2	Actinobacteria(100)	Actinobacteria(100)	Actinomycetales(100)	Micrococcaceae(100)	Rothia(100)			0	0	0	0	0	0	0	0	0	0	0	0	0	0	0	0	0	0	0	0	0	0	0	0	0	0	0	0	0	1	0	0	0	0	1	0	0	0	0	0
Otu000810	2	Actinobacteria(100)	Actinobacteria(100)	Actinomycetales(100)	Propionibacteriaceae(100)	Propionibacterium(100)			0	0	0	0	0	0	0	0	0	0	0	0	0	0	0	0	0	0	0	0	0	0	0	1	0	0	0	0	0	0	0	0	0	0	0	0	0	0	0	0
Otu000811	2	Actinobacteria(100)	Actinobacteria(100)	Actinomycetales(100)	Propionibacteriaceae(100)	Propionibacterium(100)			0	0	0	0	0	0	0	0	0	0	0	0	0	0	0	0	0	0	0	0	0	0	0	0	0	0	0	0	0	0	0	0	0	0	1	0	0	0	0	1
Otu000812	2	Actinobacteria(100)	Actinobacteria(100)	Actinomycetales(100)	Corynebacteriaceae(100)	Corynebacterium(100)			0	0	0	0	0	0	0	0	0	0	0	0	0	0	0	0	0	0	0	0	0	0	0	2	0	0	0	0	0	0	0	0	0	0	0	0	0	0	0	0
Otu000813	2	Actinobacteria(100)	Actinobacteria(100)	Actinomycetales(100)	Corynebacteriaceae(100)	Corynebacterium(100)			0	0	0	0	0	0	0	0	0	0	0	0	0	0	0	0	0	0	0	0	0	0	0	0	0	0	0	0	0	0	0	2	0	0	0	0	0	0	0	0
Otu000814	2	Actinobacteria(100)	Actinobacteria(100)	Actinomycetales(100)	Corynebacteriaceae(100)	Corynebacterium(100)			0	0	0	0	0	0	0	0	0	0	0	0	0	0	0	0	0	0	0	0	0	0	1	0	0	1	0	0	0	0	0	0	0	0	0	0	0	0	0	0
Otu000815	2	Firmicutes(100)	unclassified(100)	unclassified(100)	unclassified(100)	unclassified(100)			0	0	0	0	0	0	0	0	0	0	0	0	0	0	0	0	0	0	0	0	2	0	0	0	0	0	0	0	0	0	0	0	0	0	0	0	0	0	0	0
Otu000816	2	Firmicutes(100)	unclassified(100)	unclassified(100)	unclassified(100)	unclassified(100)			0	0	0	0	0	0	0	0	0	1	0	0	0	0	0	0	0	0	0	0	1	0	0	0	0	0	0	0	0	0	0	0	0	0	0	0	0	0	0	0
Otu000817	2	Firmicutes(100)	unclassified(100)	unclassified(100)	unclassified(100)	unclassified(100)			0	0	0	0	0	0	0	0	0	0	0	2	0	0	0	0	0	0	0	0	0	0	0	0	0	0	0	0	0	0	0	0	0	0	0	0	0	0	0	0
Otu000818	2	Firmicutes(100)	unclassified(100)	unclassified(100)	unclassified(100)	unclassified(100)			0	0	0	0	0	0	0	0	0	0	0	0	0	0	0	0	0	0	0	0	0	0	0	0	1	0	0	0	0	1	0	0	0	0	0	0	0	0	0	0
Otu000819	2	Proteobacteria(100)	Alphaproteobacteria(100)	Rhodospirillales(100)	Reyranella(100)	unclassified(100)			0	0	0	0	0	0	0	0	0	0	0	0	0	0	0	1	0	1	0	0	0	0	0	0	0	0	0	0	0	0	0	0	0	0	0	0	0	0	0	0
Otu000820	2	Proteobacteria(100)	Alphaproteobacteria(100)	Rhodospirillales(100)	Rhodospirillaceae(100)	Novispirillum(100)			0	0	0	0	0	0	0	0	0	0	0	0	0	0	0	0	0	0	0	0	0	0	0	0	0	0	2	0	0	0	0	0	0	0	0	0	0	0	0	0
Otu000821	2	Proteobacteria(100)	Gammaproteobacteria(100)	Pasteurellales(100)	Pasteurellaceae(100)	Haemophilus(100)			0	0	0	0	0	0	0	0	0	0	0	0	0	0	0	0	0	0	0	0	0	0	0	0	1	0	0	0	0	0	0	0	0	1	0	0	0	0	0	0
Otu000822	2	Proteobacteria(100)	Gammaproteobacteria(100)	Pasteurellales(100)	Pasteurellaceae(100)	unclassified(100)			0	0	0	0	0	0	0	0	0	0	0	0	0	0	0	2	0	0	0	0	0	0	0	0	0	0	0	0	0	0	0	0	0	0	0	0	0	0	0	0
Otu000823	2	Proteobacteria(100)	Betaproteobacteria(100)	Burkholderiales(100)	unclassified(100)	unclassified(100)			0	0	0	0	0	0	0	0	0	0	0	0	0	0	2	0	0	0	0	0	0	0	0	0	0	0	0	0	0	0	0	0	0	0	0	0	0	0	0	0
Otu000824	2	Proteobacteria(100)	Betaproteobacteria(100)	Burkholderiales(100)	unclassified(100)	unclassified(100)			0	0	0	0	0	0	0	0	0	0	0	0	0	0	0	0	0	1	0	0	0	0	0	0	0	0	0	0	0	0	0	0	0	1	0	0	0	0	0	0
Otu000825	2	Proteobacteria(100)	Alphaproteobacteria(100)	Rhodobacterales(100)	Rhodobacteraceae(100)	unclassified(100)			0	0	0	0	0	0	0	0	0	0	0	0	0	0	0	0	0	0	0	0	0	0	0	0	0	0	0	1	0	0	0	1	0	0	0	0	0	0	0	0
Otu000826	2	Proteobacteria(100)	Gammaproteobacteria(100)	Pseudomonadales(100)	Pseudomonadaceae(100)	unclassified(100)			0	0	1	0	0	0	0	0	0	0	0	0	0	0	0	0	0	0	0	0	0	0	0	0	0	0	0	0	0	0	0	0	0	0	1	0	0	0	0	0
Otu000827	2	Proteobacteria(100)	Gammaproteobacteria(100)	Pseudomonadales(100)	Moraxellaceae(100)	Acinetobacter(100)			0	0	0	0	0	0	0	0	0	0	0	0	0	0	0	0	0	0	0	0	0	0	0	1	0	0	0	0	0	0	0	0	0	0	0	1	0	0	0	0
Otu000828	2	Proteobacteria(100)	Gammaproteobacteria(100)	Pseudomonadales(100)	Pseudomonadaceae(100)	unclassified(100)			0	0	0	0	0	0	0	0	0	0	0	0	0	0	1	0	0	0	0	0	0	0	0	0	0	0	0	0	0	0	0	0	0	0	0	1	0	0	0	0
Otu000829	2	Proteobacteria(100)	Gammaproteobacteria(100)	Pseudomonadales(100)	Moraxellaceae(100)	Acinetobacter(100)			0	0	0	0	0	0	0	0	0	0	0	0	0	0	0	0	0	0	0	0	0	0	0	2	0	0	0	0	0	0	0	0	0	0	0	0	0	0	0	0
Otu000830	2	Proteobacteria(100)	Gammaproteobacteria(100)	Pseudomonadales(100)	Moraxellaceae(100)	Acinetobacter(100)			0	0	0	0	0	0	0	0	0	0	0	0	0	0	0	0	0	0	0	0	0	0	0	2	0	0	0	0	0	0	0	0	0	0	0	0	0	0	0	0
Otu000831	2	Proteobacteria(100)	Gammaproteobacteria(100)	Pseudomonadales(100)	Moraxellaceae(100)	Acinetobacter(100)			0	0	0	0	0	0	0	0	0	0	0	0	0	0	0	0	0	0	0	0	0	0	0	0	0	0	0	0	0	0	0	0	0	0	0	2	0	0	0	0
Otu000832	2	Proteobacteria(100)	Gammaproteobacteria(100)	Pseudomonadales(100)	Moraxellaceae(100)	Acinetobacter(100)			0	0	0	0	0	0	0	0	0	0	0	0	0	0	0	0	0	0	0	0	0	0	0	2	0	0	0	0	0	0	0	0	0	0	0	0	0	0	0	0
Otu000833	2	Proteobacteria(100)	Gammaproteobacteria(100)	Pseudomonadales(100)	Pseudomonadaceae(100)	unclassified(100)			0	0	0	0	0	0	0	0	0	0	0	0	0	0	2	0	0	0	0	0	0	0	0	0	0	0	0	0	0	0	0	0	0	0	0	0	0	0	0	0
Otu000834	2	Proteobacteria(100)	Gammaproteobacteria(100)	Chromatiales(100)	Chromatiaceae(100)	Rheinheimera(100)			0	0	0	0	0	0	0	0	0	0	0	0	0	0	0	0	0	0	0	0	0	0	0	2	0	0	0	0	0	0	0	0	0	0	0	0	0	0	0	0
Otu000835	2	Proteobacteria(100)	Alphaproteobacteria(100)	Rhodobacterales(100)	Rhodobacteraceae(100)	Rhodobacter(100)			0	0	0	0	0	0	0	0	0	0	0	0	0	0	0	0	0	0	0	0	0	0	0	0	1	0	1	0	0	0	0	0	0	0	0	0	0	0	0	0
Otu000836	2	Proteobacteria(100)	Gammaproteobacteria(100)	Pseudomonadales(100)	Moraxellaceae(100)	Acinetobacter(100)			0	0	0	0	0	0	0	0	0	0	0	0	0	0	0	0	0	0	0	0	0	0	0	1	0	0	0	0	0	0	0	0	0	0	0	1	0	0	0	0
Otu000837	2	Proteobacteria(100)	Alphaproteobacteria(100)	Rhodobacterales(100)	Rhodobacteraceae(100)	unclassified(100)			0	0	0	0	0	0	0	0	0	0	0	0	0	0	0	0	2	0	0	0	0	0	0	0	0	0	0	0	0	0	0	0	0	0	0	0	0	0	0	0
Otu000838	2	Firmicutes(100)	Clostridia(100)	Clostridiales(100)	Clostridiales_Incertae_Sedis_XI(100)	Anaerococcus(100)			0	0	0	0	0	0	0	0	0	0	0	0	0	0	0	0	0	0	0	0	0	0	0	0	0	0	0	0	0	0	0	0	2	0	0	0	0	0	0	0
Otu000839	2	Firmicutes(100)	Clostridia(100)	Clostridiales(100)	Ruminococcaceae(100)	Ruminococcus(100)			0	0	0	0	0	0	0	0	0	0	0	0	0	0	0	0	0	0	0	0	0	0	0	0	0	0	0	0	0	0	0	0	0	0	2	0	0	0	0	0
Otu000840	2	Firmicutes(100)	Clostridia(100)	Clostridiales(100)	Lachnospiraceae(100)	Clostridium_XlVa(100)			0	0	0	0	0	0	0	0	0	0	0	0	0	0	0	0	0	0	0	0	2	0	0	0	0	0	0	0	0	0	0	0	0	0	0	0	0	0	0	0
Otu000841	2	Actinobacteria(100)	Actinobacteria(100)	Actinomycetales(100)	unclassified(100)	unclassified(100)			0	0	0	0	0	0	0	0	0	0	0	0	0	0	0	0	0	0	0	0	0	0	0	0	0	0	0	0	0	0	0	1	0	0	0	0	0	0	0	1
Otu000842	2	Actinobacteria(100)	Actinobacteria(100)	Actinomycetales(100)	unclassified(100)	unclassified(100)			0	0	0	0	0	0	0	0	0	0	0	0	0	0	0	0	0	1	0	0	0	0	0	0	0	0	0	0	1	0	0	0	0	0	0	0	0	0	0	0
Otu000843	2	Actinobacteria(100)	Actinobacteria(100)	Actinomycetales(100)	Propionibacteriaceae(100)	Propionibacterium(100)			0	0	0	1	0	0	0	0	0	0	0	0	0	0	0	1	0	0	0	0	0	0	0	0	0	0	0	0	0	0	0	0	0	0	0	0	0	0	0	0
Otu000844	2	Actinobacteria(100)	Actinobacteria(100)	Actinomycetales(100)	Propionibacteriaceae(100)	unclassified(100)			0	0	0	0	0	0	0	0	0	0	0	0	0	0	0	0	0	0	1	0	0	0	0	0	0	0	1	0	0	0	0	0	0	0	0	0	0	0	0	0
Otu000845	2	Actinobacteria(100)	Actinobacteria(100)	Actinomycetales(100)	Propionibacteriaceae(100)	unclassified(100)			0	0	0	0	0	0	0	0	0	0	0	0	0	0	0	0	0	0	0	0	0	1	0	0	0	0	1	0	0	0	0	0	0	0	0	0	0	0	0	0
Otu000846	2	Firmicutes(100)	Bacilli(100)	Lactobacillales(100)	Streptococcaceae(100)	Streptococcus(100)			0	0	0	0	0	0	0	0	1	0	0	0	0	0	1	0	0	0	0	0	0	0	0	0	0	0	0	0	0	0	0	0	0	0	0	0	0	0	0	0
Otu000847	2	Firmicutes(100)	Bacilli(100)	Lactobacillales(100)	Streptococcaceae(100)	Streptococcus(100)			0	0	0	0	0	0	0	0	0	0	0	0	0	0	2	0	0	0	0	0	0	0	0	0	0	0	0	0	0	0	0	0	0	0	0	0	0	0	0	0
Otu000848	2	Firmicutes(100)	Bacilli(100)	Lactobacillales(100)	Streptococcaceae(100)	Streptococcus(100)			0	0	0	0	0	0	0	0	0	0	0	0	0	0	0	0	0	0	1	0	0	0	0	0	0	0	0	0	0	1	0	0	0	0	0	0	0	0	0	0
Otu000849	2	Firmicutes(100)	Bacilli(100)	Lactobacillales(100)	unclassified(100)	unclassified(100)			0	0	0	0	0	0	0	0	0	0	0	0	0	0	0	0	0	0	0	0	0	0	0	0	1	0	0	0	1	0	0	0	0	0	0	0	0	0	0	0
Otu000850	2	Firmicutes(100)	Bacilli(100)	Lactobacillales(100)	Streptococcaceae(100)	Streptococcus(100)			0	0	0	0	0	0	0	0	1	0	0	0	0	0	0	0	0	0	0	0	0	0	0	0	0	0	0	0	0	0	0	0	0	0	0	0	0	0	0	1
Otu000851	2	Firmicutes(100)	Bacilli(100)	Lactobacillales(100)	Streptococcaceae(100)	Streptococcus(100)			0	0	0	0	0	0	0	0	0	0	0	0	0	0	0	0	0	0	0	1	0	0	0	0	0	0	0	0	0	0	0	0	0	0	0	0	0	0	1	0
Otu000852	2	Firmicutes(100)	Bacilli(100)	Lactobacillales(100)	Streptococcaceae(100)	Streptococcus(100)			0	0	0	0	0	0	0	0	0	0	0	0	0	0	0	0	0	0	0	0	0	0	0	0	0	0	0	0	0	2	0	0	0	0	0	0	0	0	0	0
Otu000853	2	Firmicutes(100)	Bacilli(100)	Lactobacillales(100)	Streptococcaceae(100)	Streptococcus(100)			0	0	0	0	0	0	0	0	0	0	0	0	0	0	0	0	0	0	0	0	0	0	0	0	0	0	0	0	0	0	0	0	0	0	2	0	0	0	0	0
Otu000854	2	Firmicutes(100)	Bacilli(100)	Lactobacillales(100)	Streptococcaceae(100)	Streptococcus(100)			0	0	0	0	0	0	0	0	0	0	0	0	0	0	0	0	0	0	0	0	0	0	0	0	0	0	0	0	0	0	0	0	0	0	2	0	0	0	0	0
Otu000855	2	Firmicutes(100)	Bacilli(100)	Lactobacillales(100)	Streptococcaceae(100)	Streptococcus(100)			0	0	0	0	0	0	0	0	1	0	0	0	0	0	0	0	0	1	0	0	0	0	0	0	0	0	0	0	0	0	0	0	0	0	0	0	0	0	0	0
Otu000856	2	Firmicutes(100)	Bacilli(100)	Lactobacillales(100)	Streptococcaceae(100)	Streptococcus(100)			0	0	0	0	0	0	0	0	0	0	0	0	0	0	0	0	0	0	0	0	0	0	0	0	0	0	0	0	0	0	0	0	0	0	2	0	0	0	0	0
Otu000857	2	Firmicutes(100)	Bacilli(100)	Lactobacillales(100)	Streptococcaceae(100)	Streptococcus(100)			0	0	0	0	0	0	0	0	0	0	0	0	0	0	0	0	0	0	1	0	0	0	0	0	0	0	0	0	0	1	0	0	0	0	0	0	0	0	0	0
Otu000858	2	Firmicutes(100)	Bacilli(100)	Lactobacillales(100)	Streptococcaceae(100)	Streptococcus(100)			0	0	0	0	0	0	0	0	0	0	2	0	0	0	0	0	0	0	0	0	0	0	0	0	0	0	0	0	0	0	0	0	0	0	0	0	0	0	0	0
Otu000859	2	Firmicutes(100)	Bacilli(100)	Lactobacillales(100)	Streptococcaceae(100)	Streptococcus(100)			0	0	0	0	0	0	0	0	0	0	1	0	0	0	0	0	0	1	0	0	0	0	0	0	0	0	0	0	0	0	0	0	0	0	0	0	0	0	0	0
Otu000860	2	Firmicutes(100)	Bacilli(100)	Lactobacillales(100)	Streptococcaceae(100)	Streptococcus(100)			0	0	0	0	0	0	0	0	0	0	0	0	0	0	0	0	0	0	0	0	0	0	0	0	1	0	0	0	0	1	0	0	0	0	0	0	0	0	0	0
Otu000861	2	Firmicutes(100)	Bacilli(100)	Lactobacillales(100)	Streptococcaceae(100)	Streptococcus(100)			0	0	0	0	0	0	0	0	0	0	0	0	0	0	0	0	0	0	2	0	0	0	0	0	0	0	0	0	0	0	0	0	0	0	0	0	0	0	0	0
Otu000862	2	Firmicutes(100)	Bacilli(100)	Lactobacillales(100)	Streptococcaceae(100)	Streptococcus(100)			0	0	0	0	0	0	0	0	0	0	0	0	0	0	0	0	0	0	0	0	0	0	0	0	0	0	0	0	0	0	0	0	0	0	1	0	0	0	0	1
Otu000863	2	Firmicutes(100)	Bacilli(100)	Lactobacillales(100)	Streptococcaceae(100)	Streptococcus(100)			0	0	0	0	0	0	0	0	0	0	0	0	0	0	0	0	0	0	0	0	0	0	0	0	0	0	0	0	1	0	0	0	0	0	0	0	0	0	0	1
Otu000864	2	Firmicutes(100)	Bacilli(100)	Lactobacillales(100)	Streptococcaceae(100)	Streptococcus(100)			0	0	0	0	0	0	0	0	0	0	0	0	0	0	0	0	0	0	0	0	0	0	0	0	0	0	0	0	0	0	0	0	0	0	2	0	0	0	0	0
Otu000865	2	Firmicutes(100)	Bacilli(100)	Lactobacillales(100)	Streptococcaceae(100)	Streptococcus(100)			0	0	0	0	0	0	0	0	0	0	0	0	0	0	1	0	0	0	0	0	0	0	0	0	0	0	0	0	1	0	0	0	0	0	0	0	0	0	0	0
Otu000866	2	Proteobacteria(100)	Alphaproteobacteria(100)	Sphingomonadales(100)	Sphingomonadaceae(100)	unclassified(100)			0	0	0	0	0	0	0	0	0	0	0	0	0	0	0	0	0	0	0	0	0	0	0	0	0	0	0	0	2	0	0	0	0	0	0	0	0	0	0	0
Otu000867	2	Firmicutes(100)	Bacilli(100)	Lactobacillales(100)	unclassified(100)	unclassified(100)			0	0	0	0	0	0	0	0	0	0	0	0	0	0	0	1	0	0	0	0	0	0	0	0	1	0	0	0	0	0	0	0	0	0	0	0	0	0	0	0
Otu000868	2	Proteobacteria(100)	Alphaproteobacteria(100)	Rhizobiales(100)	Brucellaceae(100)	Brucella(100)			0	0	0	0	0	0	0	0	0	0	0	0	0	0	0	0	0	0	0	0	0	0	0	2	0	0	0	0	0	0	0	0	0	0	0	0	0	0	0	0
Otu000869	2	Proteobacteria(100)	Alphaproteobacteria(100)	Rhizobiales(100)	Rhizobiaceae(100)	unclassified(100)			0	0	0	0	0	0	0	0	0	2	0	0	0	0	0	0	0	0	0	0	0	0	0	0	0	0	0	0	0	0	0	0	0	0	0	0	0	0	0	0
Otu000870	2	Firmicutes(100)	Bacilli(100)	Lactobacillales(100)	Streptococcaceae(100)	Streptococcus(100)			0	0	0	0	0	0	0	0	0	0	0	0	0	0	0	0	0	0	0	0	0	0	0	0	0	0	0	0	0	1	0	0	0	0	1	0	0	0	0	0
Otu000871	2	Proteobacteria(100)	Alphaproteobacteria(100)	Rhizobiales(100)	Brucellaceae(100)	unclassified(100)			0	0	0	0	0	0	0	0	0	2	0	0	0	0	0	0	0	0	0	0	0	0	0	0	0	0	0	0	0	0	0	0	0	0	0	0	0	0	0	0
Otu000872	2	Firmicutes(100)	Bacilli(100)	Lactobacillales(100)	Streptococcaceae(100)	Streptococcus(100)			0	0	0	0	0	0	0	0	0	0	0	0	0	0	0	0	0	0	0	0	0	0	0	0	0	0	0	0	0	0	0	0	0	0	2	0	0	0	0	0
Otu000873	2	Firmicutes(100)	Bacilli(100)	Lactobacillales(100)	Streptococcaceae(100)	Streptococcus(100)			0	0	0	0	0	0	0	0	0	0	0	0	0	0	0	0	0	0	0	1	0	1	0	0	0	0	0	0	0	0	0	0	0	0	0	0	0	0	0	0
Otu000874	2	Firmicutes(100)	Bacilli(100)	Lactobacillales(100)	Streptococcaceae(100)	Streptococcus(100)			0	0	0	0	0	0	0	0	0	0	1	0	0	0	0	0	0	0	0	0	0	0	0	0	0	0	0	0	0	1	0	0	0	0	0	0	0	0	0	0
Otu000875	2	Firmicutes(100)	Bacilli(100)	Lactobacillales(100)	Streptococcaceae(100)	Streptococcus(100)			0	0	0	0	0	0	0	0	0	0	0	0	0	0	1	0	0	0	0	0	0	0	0	0	1	0	0	0	0	0	0	0	0	0	0	0	0	0	0	0
Otu000876	2	Firmicutes(100)	Bacilli(100)	Lactobacillales(100)	Streptococcaceae(100)	Streptococcus(100)			0	0	0	0	0	0	0	0	0	0	1	0	0	0	0	0	0	0	0	0	0	0	0	0	0	0	0	0	0	0	0	0	0	0	1	0	0	0	0	0
Otu000877	2	Firmicutes(100)	Bacilli(100)	Lactobacillales(100)	Streptococcaceae(100)	Streptococcus(100)			0	0	0	0	0	0	0	0	0	0	1	0	0	0	0	0	0	0	0	0	0	0	0	0	0	0	0	0	0	0	0	0	0	0	0	0	0	0	0	1
Otu000878	2	Firmicutes(100)	Bacilli(100)	Lactobacillales(100)	unclassified(100)	unclassified(100)			0	0	0	0	0	0	0	0	0	0	0	0	0	0	2	0	0	0	0	0	0	0	0	0	0	0	0	0	0	0	0	0	0	0	0	0	0	0	0	0
Otu000879	2	Firmicutes(100)	Bacilli(100)	Lactobacillales(100)	Streptococcaceae(100)	Streptococcus(100)			0	0	0	0	0	0	0	0	0	0	0	0	0	0	0	0	0	0	0	0	0	0	0	0	0	0	0	0	0	2	0	0	0	0	0	0	0	0	0	0
Otu000880	2	Firmicutes(100)	Bacilli(100)	Lactobacillales(100)	Streptococcaceae(100)	Streptococcus(100)			0	0	0	0	0	0	0	0	0	0	0	0	0	0	0	0	0	0	0	0	0	0	0	0	0	0	0	0	0	1	0	0	0	0	0	0	0	0	1	0
Otu000881	2	Firmicutes(100)	Bacilli(100)	Lactobacillales(100)	Streptococcaceae(100)	Streptococcus(100)			0	0	0	0	0	0	0	0	0	0	0	0	0	0	0	0	0	0	0	0	0	0	0	0	0	0	0	0	0	2	0	0	0	0	0	0	0	0	0	0
Otu000882	2	Firmicutes(100)	Bacilli(100)	Lactobacillales(100)	Streptococcaceae(100)	Streptococcus(100)			0	0	0	0	0	0	0	0	0	0	0	0	0	0	0	0	0	0	0	0	0	0	0	0	0	0	0	0	0	0	0	0	0	0	2	0	0	0	0	0
Otu000883	2	Firmicutes(100)	Bacilli(100)	Lactobacillales(100)	Streptococcaceae(100)	Streptococcus(100)			0	0	0	0	0	0	0	0	0	0	0	0	0	0	0	0	0	0	0	0	0	0	1	0	0	0	0	0	1	0	0	0	0	0	0	0	0	0	0	0
Otu000884	2	Firmicutes(100)	Bacilli(100)	Lactobacillales(100)	Streptococcaceae(100)	Streptococcus(100)			0	0	0	0	0	0	0	0	1	0	0	0	0	0	0	0	0	0	0	0	0	0	0	0	0	0	0	0	0	1	0	0	0	0	0	0	0	0	0	0
Otu000885	2	Proteobacteria(100)	Alphaproteobacteria(100)	Rhizobiales(100)	Brucellaceae(100)	Brucella(100)			0	0	0	0	0	0	0	0	0	2	0	0	0	0	0	0	0	0	0	0	0	0	0	0	0	0	0	0	0	0	0	0	0	0	0	0	0	0	0	0
Otu000886	2	Firmicutes(100)	Bacilli(100)	Lactobacillales(100)	Streptococcaceae(100)	Streptococcus(100)			0	0	0	0	0	0	0	0	0	0	1	0	0	0	1	0	0	0	0	0	0	0	0	0	0	0	0	0	0	0	0	0	0	0	0	0	0	0	0	0
Otu000887	2	Firmicutes(100)	Bacilli(100)	Lactobacillales(100)	Streptococcaceae(100)	Streptococcus(100)			0	0	0	0	0	0	0	0	0	0	0	0	0	0	2	0	0	0	0	0	0	0	0	0	0	0	0	0	0	0	0	0	0	0	0	0	0	0	0	0
Otu000888	2	Firmicutes(100)	Bacilli(100)	Lactobacillales(100)	unclassified(100)	unclassified(100)			0	0	0	0	0	0	0	0	0	0	0	0	0	0	0	0	0	0	1	0	0	0	0	0	0	0	0	0	0	0	0	1	0	0	0	0	0	0	0	0
Otu000889	2	Firmicutes(100)	Bacilli(100)	Lactobacillales(100)	Streptococcaceae(100)	Streptococcus(100)			0	0	0	0	0	0	0	0	0	0	0	0	0	0	0	0	0	0	0	0	0	0	0	0	0	0	0	0	0	2	0	0	0	0	0	0	0	0	0	0
Otu000890	2	Firmicutes(100)	Bacilli(100)	Lactobacillales(100)	unclassified(100)	unclassified(100)			0	0	0	0	0	0	0	0	0	0	0	0	0	0	0	0	0	0	0	0	0	0	0	0	0	0	0	0	0	0	0	0	0	0	2	0	0	0	0	0
Otu000891	2	Firmicutes(100)	Bacilli(100)	Lactobacillales(100)	Streptococcaceae(100)	Streptococcus(100)			0	0	0	0	0	0	0	0	0	0	0	0	0	0	0	0	0	0	0	0	0	0	0	0	0	0	0	0	0	2	0	0	0	0	0	0	0	0	0	0
Otu000892	2	Firmicutes(100)	Bacilli(100)	Lactobacillales(100)	Streptococcaceae(100)	Streptococcus(100)			0	0	0	0	0	0	0	0	0	0	0	0	0	0	0	0	0	0	0	0	0	0	0	0	0	0	0	0	0	1	0	0	0	0	0	0	0	0	0	1
Otu000893	2	Firmicutes(100)	Bacilli(100)	Lactobacillales(100)	Streptococcaceae(100)	Streptococcus(100)			0	0	0	0	0	0	0	0	0	0	0	0	0	0	0	0	0	1	0	0	0	1	0	0	0	0	0	0	0	0	0	0	0	0	0	0	0	0	0	0
Otu000894	2	Firmicutes(100)	Bacilli(100)	Lactobacillales(100)	Streptococcaceae(100)	Streptococcus(100)			0	0	0	0	0	0	0	0	0	0	0	0	0	0	0	0	0	0	0	0	0	0	0	0	0	0	0	0	0	0	0	0	0	0	2	0	0	0	0	0
Otu000895	2	Proteobacteria(100)	Alphaproteobacteria(100)	Rhizobiales(100)	Brucellaceae(100)	unclassified(100)			0	0	0	0	0	0	0	0	0	2	0	0	0	0	0	0	0	0	0	0	0	0	0	0	0	0	0	0	0	0	0	0	0	0	0	0	0	0	0	0
Otu000896	2	Firmicutes(100)	Bacilli(100)	Lactobacillales(100)	Streptococcaceae(100)	Streptococcus(100)			0	0	0	0	0	0	0	0	0	0	1	0	0	0	0	0	0	0	0	0	0	0	0	0	0	0	0	0	1	0	0	0	0	0	0	0	0	0	0	0
Otu000897	2	Firmicutes(100)	Bacilli(100)	Lactobacillales(100)	Streptococcaceae(100)	Streptococcus(100)			0	0	0	0	0	0	0	0	0	0	0	0	0	0	0	0	0	0	0	0	0	0	0	0	0	0	0	0	0	1	0	0	0	0	0	0	0	0	0	1
Otu000898	2	Firmicutes(100)	Bacilli(100)	Lactobacillales(100)	Streptococcaceae(100)	Streptococcus(100)			0	0	0	0	0	0	0	0	0	0	0	0	0	0	0	0	0	0	0	0	0	0	0	0	0	0	0	0	0	1	0	0	0	0	1	0	0	0	0	0
Otu000899	2	Firmicutes(100)	Bacilli(100)	Lactobacillales(100)	Streptococcaceae(100)	Streptococcus(100)			0	0	0	0	0	0	0	0	0	0	0	0	0	0	0	1	0	0	0	0	0	1	0	0	0	0	0	0	0	0	0	0	0	0	0	0	0	0	0	0
Otu000900	2	Firmicutes(100)	Bacilli(100)	Lactobacillales(100)	Streptococcaceae(100)	Streptococcus(100)			0	0	0	0	0	0	0	0	0	0	0	1	0	0	0	0	0	0	0	0	0	0	0	0	0	0	0	0	0	0	0	0	0	0	0	0	0	0	0	1
Otu000901	2	Proteobacteria(100)	unclassified(100)	unclassified(100)	unclassified(100)	unclassified(100)			0	0	0	0	0	0	0	0	0	2	0	0	0	0	0	0	0	0	0	0	0	0	0	0	0	0	0	0	0	0	0	0	0	0	0	0	0	0	0	0
Otu000902	2	Proteobacteria(100)	unclassified(100)	unclassified(100)	unclassified(100)	unclassified(100)			0	0	0	0	0	0	0	0	0	2	0	0	0	0	0	0	0	0	0	0	0	0	0	0	0	0	0	0	0	0	0	0	0	0	0	0	0	0	0	0
Otu000903	2	Firmicutes(100)	Bacilli(100)	Lactobacillales(100)	Streptococcaceae(100)	unclassified(100)			0	0	0	0	0	0	0	0	0	0	0	0	0	0	0	0	0	0	0	0	0	0	0	0	0	0	2	0	0	0	0	0	0	0	0	0	0	0	0	0
Otu000904	2	Firmicutes(100)	Bacilli(100)	Lactobacillales(100)	Streptococcaceae(100)	Streptococcus(100)			0	0	0	0	0	0	0	0	0	0	0	0	0	0	0	0	0	0	0	0	0	0	0	0	0	0	0	0	0	0	0	0	1	0	1	0	0	0	0	0
Otu000905	2	Firmicutes(100)	Bacilli(100)	Lactobacillales(100)	Streptococcaceae(100)	Streptococcus(100)			0	0	0	0	0	0	0	0	0	0	0	0	0	0	0	0	0	2	0	0	0	0	0	0	0	0	0	0	0	0	0	0	0	0	0	0	0	0	0	0
Otu000906	2	Firmicutes(100)	Bacilli(100)	Lactobacillales(100)	Streptococcaceae(100)	unclassified(100)			0	0	0	0	0	0	0	0	0	0	0	0	0	0	0	0	0	0	0	0	0	0	0	0	0	0	2	0	0	0	0	0	0	0	0	0	0	0	0	0
Otu000907	2	Firmicutes(100)	Bacilli(100)	Lactobacillales(100)	Streptococcaceae(100)	Streptococcus(100)			0	0	0	0	0	0	0	0	2	0	0	0	0	0	0	0	0	0	0	0	0	0	0	0	0	0	0	0	0	0	0	0	0	0	0	0	0	0	0	0
Otu000908	2	Firmicutes(100)	Bacilli(100)	Lactobacillales(100)	Streptococcaceae(100)	Streptococcus(100)			0	0	0	0	0	0	0	0	0	0	0	0	0	0	0	0	0	0	0	0	0	0	0	0	0	0	0	0	0	0	0	0	0	0	1	0	0	0	1	0
Otu000909	2	Firmicutes(100)	Bacilli(100)	Lactobacillales(100)	Streptococcaceae(100)	Streptococcus(100)			0	0	0	0	0	0	0	0	2	0	0	0	0	0	0	0	0	0	0	0	0	0	0	0	0	0	0	0	0	0	0	0	0	0	0	0	0	0	0	0
Otu000910	2	Firmicutes(100)	Bacilli(100)	Lactobacillales(100)	unclassified(100)	unclassified(100)			0	0	0	0	0	0	0	0	0	0	0	0	0	0	0	0	0	0	0	0	0	0	0	0	0	0	0	1	0	0	0	1	0	0	0	0	0	0	0	0
Otu000911	2	Firmicutes(100)	Bacilli(100)	Lactobacillales(100)	unclassified(100)	unclassified(100)			0	0	0	0	0	0	0	0	0	0	0	0	0	0	0	0	0	0	0	0	0	0	0	0	0	0	0	0	1	0	1	0	0	0	0	0	0	0	0	0
Otu000912	2	Firmicutes(100)	Bacilli(100)	Lactobacillales(100)	Streptococcaceae(100)	Streptococcus(100)			0	0	0	0	0	0	0	0	0	0	0	0	0	0	0	0	0	0	1	0	0	0	0	0	0	0	0	0	0	0	0	0	0	0	0	0	0	0	1	0
Otu000913	2	Proteobacteria(100)	Alphaproteobacteria(100)	Rhizobiales(100)	Rhizobiaceae(100)	unclassified(100)			0	0	0	0	0	0	0	0	0	2	0	0	0	0	0	0	0	0	0	0	0	0	0	0	0	0	0	0	0	0	0	0	0	0	0	0	0	0	0	0
Otu000914	2	Firmicutes(100)	Bacilli(100)	Lactobacillales(100)	Streptococcaceae(100)	Streptococcus(100)			0	0	0	0	0	0	0	0	0	0	0	0	0	2	0	0	0	0	0	0	0	0	0	0	0	0	0	0	0	0	0	0	0	0	0	0	0	0	0	0
Otu000915	2	Firmicutes(100)	Bacilli(100)	Lactobacillales(100)	Streptococcaceae(100)	Streptococcus(100)			0	0	0	0	0	0	0	0	1	0	0	0	0	0	0	0	0	0	0	0	0	0	0	0	0	0	0	0	1	0	0	0	0	0	0	0	0	0	0	0
Otu000916	2	Firmicutes(100)	Bacilli(100)	Lactobacillales(100)	Streptococcaceae(100)	Streptococcus(100)			0	0	0	0	0	0	0	0	0	0	0	0	0	0	0	0	0	0	0	0	0	0	0	0	0	0	0	0	0	0	0	0	0	0	2	0	0	0	0	0
Otu000917	2	Firmicutes(100)	Bacilli(100)	Lactobacillales(100)	Streptococcaceae(100)	Streptococcus(100)			0	0	0	0	0	0	0	0	0	0	0	0	0	0	0	0	0	0	0	0	0	0	0	0	0	0	0	0	0	0	0	0	0	0	2	0	0	0	0	0
Otu000918	2	Firmicutes(100)	Bacilli(100)	Lactobacillales(100)	Streptococcaceae(100)	Streptococcus(100)			0	0	0	0	0	0	0	0	0	0	0	0	0	0	0	0	0	0	0	0	0	0	0	0	0	0	0	0	0	2	0	0	0	0	0	0	0	0	0	0
Otu000919	2	Firmicutes(100)	Bacilli(100)	Lactobacillales(100)	Streptococcaceae(100)	Streptococcus(100)			0	0	0	0	0	0	0	0	1	0	0	0	0	0	1	0	0	0	0	0	0	0	0	0	0	0	0	0	0	0	0	0	0	0	0	0	0	0	0	0
Otu000920	2	Firmicutes(100)	Bacilli(100)	Lactobacillales(100)	unclassified(100)	unclassified(100)			0	0	0	0	0	0	0	0	0	0	0	0	0	0	0	0	0	0	0	0	0	0	0	0	0	0	2	0	0	0	0	0	0	0	0	0	0	0	0	0
Otu000921	2	Firmicutes(100)	Bacilli(100)	Lactobacillales(100)	Streptococcaceae(100)	Streptococcus(100)			0	0	0	0	0	0	0	0	0	0	0	0	0	0	0	0	0	0	0	0	0	0	0	0	0	0	0	0	0	0	0	0	0	0	2	0	0	0	0	0
Otu000922	2	Firmicutes(100)	Bacilli(100)	Lactobacillales(100)	Streptococcaceae(100)	Streptococcus(100)			0	0	0	0	0	0	0	0	0	0	0	0	0	0	0	0	0	0	0	0	0	0	0	0	0	0	2	0	0	0	0	0	0	0	0	0	0	0	0	0
Otu000923	2	Firmicutes(100)	Bacilli(100)	Lactobacillales(100)	Streptococcaceae(100)	Streptococcus(100)			0	0	0	0	0	0	0	0	0	0	0	0	0	0	1	0	0	0	0	0	0	0	0	0	1	0	0	0	0	0	0	0	0	0	0	0	0	0	0	0
Otu000924	2	Firmicutes(100)	Bacilli(100)	Lactobacillales(100)	Streptococcaceae(100)	unclassified(100)			0	0	0	0	0	0	0	0	0	0	0	0	0	0	0	0	0	0	0	0	0	2	0	0	0	0	0	0	0	0	0	0	0	0	0	0	0	0	0	0
Otu000925	2	Firmicutes(100)	Bacilli(100)	Lactobacillales(100)	Streptococcaceae(100)	Streptococcus(100)			0	0	0	0	0	0	0	0	0	0	0	0	0	0	0	1	0	0	0	0	0	0	0	0	1	0	0	0	0	0	0	0	0	0	0	0	0	0	0	0
Otu000926	2	Proteobacteria(100)	Gammaproteobacteria(100)	Legionellales(100)	Coxiellaceae(100)	Diplorickettsia(100)			0	0	0	0	0	0	0	0	0	0	0	0	0	0	0	0	0	0	2	0	0	0	0	0	0	0	0	0	0	0	0	0	0	0	0	0	0	0	0	0
Otu000927	2	Firmicutes(100)	Bacilli(100)	Lactobacillales(100)	Streptococcaceae(100)	Streptococcus(100)			0	0	0	0	0	0	0	0	0	0	0	0	0	0	0	0	0	0	0	0	0	0	0	0	0	0	0	0	0	0	0	0	0	0	2	0	0	0	0	0
Otu000928	2	Firmicutes(100)	Bacilli(100)	Lactobacillales(100)	unclassified(100)	unclassified(100)			0	0	0	0	0	0	0	0	0	0	0	0	0	0	0	1	0	1	0	0	0	0	0	0	0	0	0	0	0	0	0	0	0	0	0	0	0	0	0	0
Otu000929	2	Proteobacteria(100)	Alphaproteobacteria(100)	Rhizobiales(100)	unclassified(100)	unclassified(100)			0	0	0	0	0	0	0	0	0	2	0	0	0	0	0	0	0	0	0	0	0	0	0	0	0	0	0	0	0	0	0	0	0	0	0	0	0	0	0	0
Otu000930	2	Proteobacteria(100)	Alphaproteobacteria(100)	Rhizobiales(100)	unclassified(100)	unclassified(100)			0	0	0	0	0	0	0	0	0	2	0	0	0	0	0	0	0	0	0	0	0	0	0	0	0	0	0	0	0	0	0	0	0	0	0	0	0	0	0	0
Otu000931	2	Firmicutes(100)	Bacilli(100)	Lactobacillales(100)	Streptococcaceae(100)	Streptococcus(100)			0	0	0	0	0	0	0	0	0	0	0	0	0	0	0	0	0	0	0	0	0	0	1	0	1	0	0	0	0	0	0	0	0	0	0	0	0	0	0	0
Otu000932	2	Proteobacteria(100)	Alphaproteobacteria(100)	Sphingomonadales(100)	Sphingomonadaceae(100)	Sphingorhabdus(100)			0	0	0	0	0	0	0	0	0	0	0	0	0	0	0	0	0	0	0	0	0	0	0	0	0	0	2	0	0	0	0	0	0	0	0	0	0	0	0	0
Otu000933	2	Firmicutes(100)	Bacilli(100)	Lactobacillales(100)	Streptococcaceae(100)	Streptococcus(100)			0	0	0	0	0	0	0	0	0	0	2	0	0	0	0	0	0	0	0	0	0	0	0	0	0	0	0	0	0	0	0	0	0	0	0	0	0	0	0	0
Otu000934	2	Firmicutes(100)	Bacilli(100)	Lactobacillales(100)	Streptococcaceae(100)	Streptococcus(100)			0	0	0	0	0	0	0	0	1	0	0	0	0	0	1	0	0	0	0	0	0	0	0	0	0	0	0	0	0	0	0	0	0	0	0	0	0	0	0	0
Otu000935	2	Proteobacteria(100)	Alphaproteobacteria(100)	Rhizobiales(100)	unclassified(100)	unclassified(100)			0	0	0	0	2	0	0	0	0	0	0	0	0	0	0	0	0	0	0	0	0	0	0	0	0	0	0	0	0	0	0	0	0	0	0	0	0	0	0	0
Otu000936	2	Firmicutes(100)	Bacilli(100)	Lactobacillales(100)	Streptococcaceae(100)	Streptococcus(100)			0	0	0	0	0	0	0	0	0	0	0	0	0	0	0	0	0	0	1	0	0	0	0	0	0	0	0	0	0	0	0	0	0	0	0	0	0	0	1	0
Otu000937	2	Proteobacteria(100)	Alphaproteobacteria(100)	Rhizobiales(100)	Brucellaceae(100)	Brucella(100)			0	0	0	0	0	0	0	0	0	2	0	0	0	0	0	0	0	0	0	0	0	0	0	0	0	0	0	0	0	0	0	0	0	0	0	0	0	0	0	0
Otu000938	2	Firmicutes(100)	Bacilli(100)	Lactobacillales(100)	Streptococcaceae(100)	Streptococcus(100)			0	0	0	0	0	0	0	0	0	0	0	0	0	0	0	0	0	0	0	0	0	0	0	0	0	0	0	0	0	0	0	0	1	0	0	0	0	0	0	1
Otu000939	1	Firmicutes(100)	Bacilli(100)	Bacillales(100)	Bacillales_Incertae_Sedis_XI(100)	Gemella(100)			0	0	0	0	0	0	0	0	0	0	0	0	0	0	0	0	0	0	0	0	0	0	0	0	1	0	0	0	0	0	0	0	0	0	0	0	0	0	0	0
Otu000940	1	Firmicutes(100)	Bacilli(100)	Bacillales(100)	Staphylococcaceae(100)	Staphylococcus(100)			0	0	0	0	0	0	0	0	0	0	0	0	0	0	0	0	0	0	0	0	0	0	1	0	0	0	0	0	0	0	0	0	0	0	0	0	0	0	0	0
Otu000941	1	Firmicutes(100)	Bacilli(100)	Bacillales(100)	Bacillales_Incertae_Sedis_XI(100)	Gemella(100)			0	0	0	0	0	0	0	0	0	0	0	0	0	0	0	0	0	0	0	0	0	0	0	0	1	0	0	0	0	0	0	0	0	0	0	0	0	0	0	0
Otu000942	1	Firmicutes(100)	Bacilli(100)	Bacillales(100)	Staphylococcaceae(100)	Staphylococcus(100)			0	0	0	0	0	0	0	0	1	0	0	0	0	0	0	0	0	0	0	0	0	0	0	0	0	0	0	0	0	0	0	0	0	0	0	0	0	0	0	0
Otu000943	1	Firmicutes(100)	Bacilli(100)	Bacillales(100)	unclassified(100)	unclassified(100)			0	0	0	0	0	0	0	0	0	0	0	0	0	0	0	0	0	0	0	0	0	0	0	0	0	0	0	0	0	0	0	0	1	0	0	0	0	0	0	0
Otu000944	1	Firmicutes(100)	Bacilli(100)	Bacillales(100)	Bacillales_Incertae_Sedis_XI(100)	Gemella(100)			0	0	0	0	0	0	0	0	0	0	0	0	0	0	0	0	0	0	0	0	0	0	0	0	1	0	0	0	0	0	0	0	0	0	0	0	0	0	0	0
Otu000945	1	Firmicutes(100)	Bacilli(100)	Bacillales(100)	Bacillales_Incertae_Sedis_XI(100)	Gemella(100)			0	0	0	0	0	0	0	0	0	0	0	0	0	0	0	0	0	0	0	0	0	0	0	0	0	0	0	0	0	0	0	0	1	0	0	0	0	0	0	0
Otu000946	1	Firmicutes(100)	Bacilli(100)	Bacillales(100)	Bacillales_Incertae_Sedis_XI(100)	Gemella(100)			0	0	0	0	0	0	0	0	0	0	0	0	0	0	0	0	0	0	0	0	0	0	0	0	1	0	0	0	0	0	0	0	0	0	0	0	0	0	0	0
Otu000947	1	Firmicutes(100)	Bacilli(100)	Bacillales(100)	Bacillales_Incertae_Sedis_XI(100)	Gemella(100)			0	0	0	0	0	0	0	0	0	0	0	0	0	0	0	0	0	0	0	0	0	0	0	0	0	0	0	0	0	0	0	0	1	0	0	0	0	0	0	0
Otu000948	1	Firmicutes(100)	Bacilli(100)	Bacillales(100)	unclassified(100)	unclassified(100)			0	0	0	0	0	0	0	0	0	0	0	0	0	0	0	0	0	0	0	0	0	0	0	0	0	0	0	0	0	0	0	0	1	0	0	0	0	0	0	0
Otu000949	1	Firmicutes(100)	Bacilli(100)	Bacillales(100)	Bacillales_Incertae_Sedis_XI(100)	Gemella(100)			0	0	0	0	0	0	0	0	0	0	0	0	0	0	0	0	0	0	0	0	0	0	0	0	1	0	0	0	0	0	0	0	0	0	0	0	0	0	0	0
Otu000950	1	Firmicutes(100)	Bacilli(100)	Bacillales(100)	unclassified(100)	unclassified(100)			0	0	0	0	0	0	0	0	0	0	0	0	0	0	0	0	0	0	0	0	0	0	0	0	0	0	0	0	0	0	0	0	0	1	0	0	0	0	0	0
Otu000951	1	Firmicutes(100)	Bacilli(100)	Bacillales(100)	Staphylococcaceae(100)	Staphylococcus(100)			0	0	0	0	0	0	0	0	0	0	0	0	0	0	0	0	0	0	0	0	0	0	0	0	0	0	0	0	0	0	0	0	1	0	0	0	0	0	0	0
Otu000952	1	Firmicutes(100)	Bacilli(100)	Bacillales(100)	Bacillales_Incertae_Sedis_XI(100)	Gemella(100)			0	0	0	0	0	0	0	0	0	0	0	0	0	0	0	0	0	0	0	0	0	0	0	0	0	0	0	0	0	0	0	0	1	0	0	0	0	0	0	0
Otu000953	1	Firmicutes(100)	Bacilli(100)	Bacillales(100)	Bacillales_Incertae_Sedis_XI(100)	Gemella(100)			0	0	0	0	0	0	0	0	0	0	0	0	0	0	0	0	0	0	0	0	0	0	0	0	1	0	0	0	0	0	0	0	0	0	0	0	0	0	0	0
Otu000954	1	Firmicutes(100)	Bacilli(100)	Bacillales(100)	Staphylococcaceae(100)	Staphylococcus(100)			0	0	0	0	0	0	0	0	0	0	0	0	0	0	0	0	0	0	0	0	0	0	0	0	0	0	0	0	0	0	0	0	1	0	0	0	0	0	0	0
Otu000955	1	Firmicutes(100)	Bacilli(100)	Bacillales(100)	Staphylococcaceae(100)	Staphylococcus(100)			0	0	0	0	0	0	0	0	0	0	0	0	0	0	0	0	0	0	0	0	0	0	0	0	0	0	0	0	0	0	0	0	1	0	0	0	0	0	0	0
Otu000956	1	Firmicutes(100)	Bacilli(100)	Bacillales(100)	Staphylococcaceae(100)	Staphylococcus(100)			0	0	0	0	0	0	0	0	0	0	0	0	0	0	0	0	0	0	0	0	0	0	0	0	0	0	0	0	0	0	0	0	1	0	0	0	0	0	0	0
Otu000957	1	Firmicutes(100)	Bacilli(100)	Bacillales(100)	Staphylococcaceae(100)	unclassified(100)			0	0	0	0	0	0	0	0	0	0	0	0	0	0	0	0	0	0	0	0	0	0	0	0	0	0	0	0	0	0	0	0	1	0	0	0	0	0	0	0
Otu000958	1	Firmicutes(100)	Bacilli(100)	Bacillales(100)	Bacillales_Incertae_Sedis_XI(100)	Gemella(100)			0	0	0	0	0	0	0	0	0	0	0	0	0	0	0	0	0	0	0	0	0	0	0	0	1	0	0	0	0	0	0	0	0	0	0	0	0	0	0	0
Otu000959	1	Firmicutes(100)	Bacilli(100)	Bacillales(100)	Staphylococcaceae(100)	Staphylococcus(100)			0	0	0	0	0	0	0	0	0	0	0	0	0	0	0	0	0	0	0	0	0	0	0	0	0	0	0	0	0	0	0	0	1	0	0	0	0	0	0	0
Otu000960	1	Firmicutes(100)	Bacilli(100)	Bacillales(100)	Bacillales_Incertae_Sedis_XI(100)	Gemella(100)			0	0	0	0	0	0	0	0	0	0	0	0	0	0	0	0	0	0	0	0	0	0	0	0	0	0	0	0	0	0	0	0	1	0	0	0	0	0	0	0
Otu000961	1	Firmicutes(100)	Bacilli(100)	Bacillales(100)	Staphylococcaceae(100)	Staphylococcus(100)			0	0	0	0	0	0	0	0	0	0	0	0	0	0	0	0	0	0	0	0	0	0	0	0	0	0	0	0	0	0	0	0	1	0	0	0	0	0	0	0
Otu000962	1	Firmicutes(100)	Bacilli(100)	Bacillales(100)	Staphylococcaceae(100)	Staphylococcus(100)			0	0	0	0	0	0	0	0	0	0	0	0	0	0	0	0	0	0	0	0	0	0	0	0	0	0	0	0	0	0	0	0	1	0	0	0	0	0	0	0
Otu000963	1	Firmicutes(100)	Bacilli(100)	Bacillales(100)	Bacillales_Incertae_Sedis_XI(100)	Gemella(100)			0	0	0	0	0	0	0	0	0	0	0	0	0	0	0	0	0	0	0	0	0	0	0	0	1	0	0	0	0	0	0	0	0	0	0	0	0	0	0	0
Otu000964	1	Firmicutes(100)	Bacilli(100)	Bacillales(100)	Staphylococcaceae(100)	Staphylococcus(100)			0	0	0	0	0	0	0	0	0	0	0	0	0	0	0	0	0	0	0	0	0	0	0	0	0	0	0	0	0	0	0	0	1	0	0	0	0	0	0	0
Otu000965	1	Firmicutes(100)	Bacilli(100)	Bacillales(100)	Staphylococcaceae(100)	Staphylococcus(100)			0	0	0	0	0	0	0	0	0	0	0	0	0	0	0	0	0	0	0	0	0	0	0	0	0	0	0	0	0	0	0	0	1	0	0	0	0	0	0	0
Otu000966	1	Firmicutes(100)	Bacilli(100)	Bacillales(100)	Staphylococcaceae(100)	Staphylococcus(100)			0	0	0	0	0	0	0	0	0	0	0	0	0	0	0	0	0	0	0	0	0	0	0	0	1	0	0	0	0	0	0	0	0	0	0	0	0	0	0	0
Otu000967	1	Firmicutes(100)	Bacilli(100)	Bacillales(100)	Bacillales_Incertae_Sedis_XI(100)	Gemella(100)			0	0	0	0	0	0	0	0	0	0	0	0	0	0	0	0	0	0	0	0	0	0	0	0	0	0	0	0	0	0	0	0	1	0	0	0	0	0	0	0
Otu000968	1	Firmicutes(100)	Bacilli(100)	Bacillales(100)	Bacillales_Incertae_Sedis_XI(100)	Gemella(100)			0	0	0	0	0	0	0	0	0	0	0	0	0	0	0	0	0	0	0	0	0	0	0	0	0	0	0	0	0	0	0	0	1	0	0	0	0	0	0	0
Otu000969	1	Firmicutes(100)	Bacilli(100)	Bacillales(100)	Bacillales_Incertae_Sedis_XI(100)	Gemella(100)			0	0	0	0	0	0	0	0	1	0	0	0	0	0	0	0	0	0	0	0	0	0	0	0	0	0	0	0	0	0	0	0	0	0	0	0	0	0	0	0
Otu000970	1	Firmicutes(100)	Bacilli(100)	Bacillales(100)	unclassified(100)	unclassified(100)			0	0	0	0	0	0	0	0	0	0	0	0	0	0	0	0	0	0	0	0	0	0	0	0	0	0	0	0	0	0	0	0	1	0	0	0	0	0	0	0
Otu000971	1	Firmicutes(100)	Bacilli(100)	Bacillales(100)	Bacillales_Incertae_Sedis_XI(100)	Gemella(100)			0	0	0	0	0	0	0	0	0	0	0	0	0	0	0	0	0	0	0	0	0	0	0	0	1	0	0	0	0	0	0	0	0	0	0	0	0	0	0	0
Otu000972	1	Firmicutes(100)	Bacilli(100)	Bacillales(100)	Bacillales_Incertae_Sedis_XI(100)	Gemella(100)			0	0	0	0	0	0	0	0	0	0	0	0	0	0	0	0	0	0	0	0	0	0	0	0	1	0	0	0	0	0	0	0	0	0	0	0	0	0	0	0
Otu000973	1	Firmicutes(100)	Bacilli(100)	Bacillales(100)	Bacillales_Incertae_Sedis_XI(100)	Gemella(100)			0	0	0	0	0	0	0	0	0	0	0	0	0	0	0	0	0	0	0	0	0	0	0	0	1	0	0	0	0	0	0	0	0	0	0	0	0	0	0	0
Otu000974	1	Firmicutes(100)	Bacilli(100)	Bacillales(100)	unclassified(100)	unclassified(100)			0	0	0	0	0	0	0	0	1	0	0	0	0	0	0	0	0	0	0	0	0	0	0	0	0	0	0	0	0	0	0	0	0	0	0	0	0	0	0	0
Otu000975	1	Firmicutes(100)	Bacilli(100)	Bacillales(100)	Bacillales_Incertae_Sedis_XI(100)	Gemella(100)			0	0	0	0	0	0	0	0	0	0	0	0	0	0	0	0	0	0	0	0	0	0	0	0	1	0	0	0	0	0	0	0	0	0	0	0	0	0	0	0
Otu000976	1	Firmicutes(100)	Bacilli(100)	Bacillales(100)	Staphylococcaceae(100)	Staphylococcus(100)			0	0	0	0	0	0	0	0	0	0	0	0	0	0	0	0	0	0	0	0	0	0	0	0	1	0	0	0	0	0	0	0	0	0	0	0	0	0	0	0
Otu000977	1	Firmicutes(100)	Bacilli(100)	Bacillales(100)	Staphylococcaceae(100)	Staphylococcus(100)			0	0	0	0	0	0	0	0	0	0	0	0	0	0	0	0	0	0	0	0	0	0	0	0	1	0	0	0	0	0	0	0	0	0	0	0	0	0	0	0
Otu000978	1	Firmicutes(100)	Bacilli(100)	Bacillales(100)	Bacillales_Incertae_Sedis_XI(100)	Gemella(100)			0	0	0	0	0	0	0	0	0	0	0	0	0	0	0	0	0	0	0	0	0	0	0	0	1	0	0	0	0	0	0	0	0	0	0	0	0	0	0	0
Otu000979	1	Firmicutes(100)	Bacilli(100)	Bacillales(100)	Bacillales_Incertae_Sedis_XI(100)	Gemella(100)			0	0	0	0	0	0	0	0	0	0	0	0	0	0	0	0	0	0	0	0	0	0	0	0	1	0	0	0	0	0	0	0	0	0	0	0	0	0	0	0
Otu000980	1	Firmicutes(100)	Bacilli(100)	Bacillales(100)	unclassified(100)	unclassified(100)			0	0	0	0	0	0	0	0	0	0	0	0	0	0	0	0	0	0	0	0	0	0	0	0	0	0	0	0	0	0	0	0	1	0	0	0	0	0	0	0
Otu000981	1	Firmicutes(100)	Bacilli(100)	Bacillales(100)	unclassified(100)	unclassified(100)			0	0	0	0	0	0	0	0	0	0	0	0	0	0	0	0	0	0	0	0	0	0	0	0	0	0	0	0	0	0	0	0	1	0	0	0	0	0	0	0
Otu000982	1	Firmicutes(100)	Bacilli(100)	Bacillales(100)	unclassified(100)	unclassified(100)			0	0	0	0	0	0	0	0	1	0	0	0	0	0	0	0	0	0	0	0	0	0	0	0	0	0	0	0	0	0	0	0	0	0	0	0	0	0	0	0
Otu000983	1	Firmicutes(100)	Bacilli(100)	Bacillales(100)	Staphylococcaceae(100)	Staphylococcus(100)			0	0	0	0	0	0	0	0	0	0	0	0	0	0	0	0	0	0	0	0	0	0	0	0	0	0	0	0	0	0	0	0	0	1	0	0	0	0	0	0
Otu000984	1	Firmicutes(100)	Bacilli(100)	Bacillales(100)	Bacillales_Incertae_Sedis_XI(100)	Gemella(100)			0	0	0	0	0	0	0	0	0	0	0	0	0	0	0	0	0	0	0	0	0	0	0	0	1	0	0	0	0	0	0	0	0	0	0	0	0	0	0	0
Otu000985	1	Firmicutes(100)	Bacilli(100)	Bacillales(100)	Staphylococcaceae(100)	Staphylococcus(100)			0	0	0	0	0	0	0	0	0	0	0	0	0	0	0	0	0	0	0	0	0	0	0	0	0	0	0	0	0	0	0	0	1	0	0	0	0	0	0	0
Otu000986	1	Firmicutes(100)	Bacilli(100)	Bacillales(100)	unclassified(100)	unclassified(100)			0	0	0	0	0	0	0	0	0	0	0	0	0	0	0	0	0	0	0	0	0	0	0	0	0	0	0	0	0	0	0	0	1	0	0	0	0	0	0	0
Otu000987	1	Firmicutes(100)	Bacilli(100)	Bacillales(100)	Bacillales_Incertae_Sedis_XI(100)	Gemella(100)			0	0	0	0	0	0	0	0	0	0	0	0	0	0	0	0	0	0	0	0	0	0	0	0	1	0	0	0	0	0	0	0	0	0	0	0	0	0	0	0
Otu000988	1	Firmicutes(100)	Bacilli(100)	Bacillales(100)	Bacillales_Incertae_Sedis_XI(100)	Gemella(100)			0	0	0	0	0	0	0	0	0	0	0	0	0	0	0	0	0	0	0	0	0	0	0	0	0	0	0	0	0	0	0	0	1	0	0	0	0	0	0	0
Otu000989	1	Firmicutes(100)	Bacilli(100)	Bacillales(100)	Bacillales_Incertae_Sedis_XI(100)	Gemella(100)			0	0	0	0	0	0	0	0	0	0	0	0	0	0	0	0	0	0	0	0	0	0	0	0	1	0	0	0	0	0	0	0	0	0	0	0	0	0	0	0
Otu000990	1	Firmicutes(100)	Bacilli(100)	Bacillales(100)	Bacillales_Incertae_Sedis_XI(100)	Gemella(100)			0	0	0	0	0	0	0	0	0	0	0	0	0	0	0	0	0	0	0	0	0	0	0	0	1	0	0	0	0	0	0	0	0	0	0	0	0	0	0	0
Otu000991	1	Firmicutes(100)	Bacilli(100)	Bacillales(100)	Staphylococcaceae(100)	Staphylococcus(100)			0	0	0	0	0	0	0	0	0	0	0	0	0	0	0	0	0	0	0	0	0	0	0	0	1	0	0	0	0	0	0	0	0	0	0	0	0	0	0	0
Otu000992	1	Firmicutes(100)	Bacilli(100)	Bacillales(100)	Staphylococcaceae(100)	Staphylococcus(100)			0	0	0	0	0	0	0	0	0	0	0	0	0	0	0	0	0	0	0	0	0	0	0	0	1	0	0	0	0	0	0	0	0	0	0	0	0	0	0	0
Otu000993	1	Firmicutes(100)	Bacilli(100)	Bacillales(100)	Bacillales_Incertae_Sedis_XI(100)	Gemella(100)			0	0	0	0	0	0	0	0	0	0	0	0	0	0	0	0	0	0	0	0	0	0	0	0	0	0	0	0	0	0	0	0	1	0	0	0	0	0	0	0
Otu000994	1	Firmicutes(100)	Bacilli(100)	Bacillales(100)	unclassified(100)	unclassified(100)			0	0	0	0	0	0	0	0	0	0	0	0	0	0	0	0	0	0	0	0	0	0	0	0	0	0	0	0	0	0	0	1	0	0	0	0	0	0	0	0
Otu000995	1	Firmicutes(100)	Bacilli(100)	Bacillales(100)	Bacillales_Incertae_Sedis_XI(100)	Gemella(100)			0	0	0	0	0	0	0	0	0	0	0	0	0	0	0	0	0	0	0	0	0	0	0	0	0	0	0	0	0	0	0	0	1	0	0	0	0	0	0	0
Otu000996	1	Firmicutes(100)	Bacilli(100)	Bacillales(100)	Staphylococcaceae(100)	Staphylococcus(100)			0	0	0	0	0	0	0	0	0	0	0	0	0	0	0	0	0	0	0	0	0	0	0	0	0	0	0	0	0	0	0	0	1	0	0	0	0	0	0	0
Otu000997	1	Firmicutes(100)	Bacilli(100)	Bacillales(100)	Bacillales_Incertae_Sedis_XI(100)	Gemella(100)			0	0	0	0	0	0	0	0	0	0	0	0	0	0	0	0	0	0	0	0	0	0	0	0	1	0	0	0	0	0	0	0	0	0	0	0	0	0	0	0
Otu000998	1	Firmicutes(100)	Bacilli(100)	Bacillales(100)	Staphylococcaceae(100)	Staphylococcus(100)			0	0	0	0	0	0	0	0	0	0	0	0	0	0	0	0	0	0	0	0	0	0	0	0	0	0	0	0	0	0	0	0	1	0	0	0	0	0	0	0
Otu000999	1	Firmicutes(100)	Bacilli(100)	Bacillales(100)	Staphylococcaceae(100)	Staphylococcus(100)			0	0	0	0	0	0	0	0	0	0	0	0	0	0	0	0	0	0	0	0	0	0	0	1	0	0	0	0	0	0	0	0	0	0	0	0	0	0	0	0
Otu001000	1	Firmicutes(100)	Bacilli(100)	Bacillales(100)	Staphylococcaceae(100)	Staphylococcus(100)			0	0	0	0	0	0	0	0	0	0	0	0	0	0	0	0	0	0	0	0	0	0	0	1	0	0	0	0	0	0	0	0	0	0	0	0	0	0	0	0

## Sheet: Table S3
Table S3: Relative abundance of each OTU per sample.
Each sample was subsampled to 10000 reads/sample. Sample s07 was excluded during this step. Taxonomy is infered with RDP reference base (mothur, trainset16). OTUs that included less than 0.01 % of total reads obtained were removed.
OTUs	Phylum	Class	Order	Family	Genus	Prevalence [%]	Average abundance [%]	s01	s02	s03	s05	s08	s09	s10	s11	s12	s13	s14	s15	s16	s17	s18	s19	s20	s21	s22	s23	s24	s25	s26	s27	s28	s29	s30	s31	s32	s33	s34
Otu000001	Firmicutes(100)	Bacilli(100)	Bacillales(100)	Staphylococcaceae(100)	Staphylococcus(100)	100	35.9494	0.4793	0.0595	0.0924	0.0819	0.4042	0.0263	0.0986	0.5069	0.4502	0.6145	0.1804	0.3433	0.2266	0.6726	0.1355	0.0297	0.7547	0.6864	0.7427	0.4102	0.0726	0.216	0.6799	0.1508	0.9501	0.3254	0.0246	0.019	0.8179	0.3416	0.5505
Otu000002	Firmicutes(100)	Bacilli(100)	Lactobacillales(100)	Streptococcaceae(100)	Streptococcus(100)	100	20.0819	0.3284	0.0075	0.1807	0.4804	0.2521	0.1517	0.8686	0.081	0.4529	0.1058	0.0584	0.0026	0.2347	0.0585	0.0314	0.5841	0.0636	0.0336	0.0266	0.3987	0.4422	0.6756	0.0522	0.0535	0.0099	0.1992	0.0947	0.0004	0.0002	0.2016	0.0946
Otu000003	Firmicutes(100)	Bacilli(100)	Lactobacillales(100)	Streptococcaceae(100)	Streptococcus(100)	93.5484	14.7329	0.092	0.0086	0.4665	0.1359	0	0.1806	0	0.1229	0.0516	0.2128	0.7215	0.0023	0.3312	0.194	0.0008	0.1787	0.0121	0.0138	0.072	0.1595	0.1711	0.026	0.1827	0.4813	0.0048	0.1785	0.0453	0.0006	0.0556	0.2477	0.2168
Otu000004	Proteobacteria(100)	Gammaproteobacteria(100)	Pseudomonadales(100)	Moraxellaceae(100)	Acinetobacter(100)	70.9677	4.97806	0.0001	0.0012	0	0.0111	0.0273	0.218	0.0007	0.0029	0.0094	0	0	0.0006	0.0206	0.0001	0.5329	0	0	0.0002	0.036	0	0.0043	0.0001	0	0.0038	0.0004	0.0305	0.6425	0.0004	0.0001	0	0
Otu000006	Proteobacteria(100)	Gammaproteobacteria(100)	Pseudomonadales(100)	Pseudomonadaceae(100)	Pseudomonas(97)	100	3.77677	0.0005	0.0002	0.0986	0.0752	0.1434	0.0003	0.0056	0.0922	0.0092	0.0041	0.0077	0.0002	0.0058	0.005	0.003	0.0028	0.0087	0.0009	0.0148	0.0021	0.0092	0.0266	0.0185	0.0225	0.0068	0.0091	0.004	0.456	0.0698	0.0217	0.0463
Otu000007	Firmicutes(100)	Bacilli(100)	Bacillales(100)	Bacillales_Incertae_Sedis_XI(100)	Gemella(100)	90.3226	2.62097	0.0876	0.0001	0.0013	0.0548	0.0544	0.0006	0.002	0.0238	0.0065	0.0011	0.001	0	0.0175	0.0463	0.0011	0.1232	0.0253	0.0001	0.0002	0.015	0.1722	0.0065	0.0172	0.0277	0.0125	0.0049	0.0087	0	0	0.0973	0.0036
Otu000005	Proteobacteria(100)	Gammaproteobacteria(100)	Pseudomonadales(100)	Moraxellaceae(100)	Acinetobacter(100)	22.5806	2.03226	0.0001	0	0	0	0	0.0001	0	0	0	0	0	0.6274	0.0002	0	0.0001	0.0002	0	0	0.0019	0	0	0	0	0	0	0	0	0	0	0	0
Otu000012	Proteobacteria(100)	Gammaproteobacteria(100)	Enterobacteriales(100)	Enterobacteriaceae(100)	unclassified(95)	80.6452	1.58548	0.0001	0.3372	0.0004	0.0007	0.0034	0	0.0006	0.0022	0	0.0004	0.0057	0	0.0033	0.0001	0.0009	0.0004	0	0	0.0013	0.0001	0.0005	0.0002	0.0007	0	0.0001	0.0009	0.0525	0.0758	0.0035	0.0004	0.0001
Otu000008	Actinobacteria(100)	Actinobacteria(100)	Actinomycetales(100)	Cellulomonadaceae(100)	Cellulomonas(100)	93.5484	1.55032	0.0004	0	0.0249	0.0184	0.0482	0.0001	0.0013	0.0245	0.0026	0.0016	0.0024	0	0.0025	0.0013	0.001	0.0013	0.0046	0.0007	0.0054	0.0013	0.0036	0.0112	0.0114	0.0096	0.0035	0.0062	0.001	0.2388	0.0203	0.0086	0.0239
Otu000011	Actinobacteria(100)	Actinobacteria(100)	Actinomycetales(100)	Micrococcaceae(100)	Rothia(100)	74.1935	1.33129	0	0.0039	0.0527	0.009	0.0051	0.0369	0.0022	0.0044	0.0004	0.0174	0.0011	0	0.0034	0	0.0031	0.015	0.0839	0.0025	0	0	0.0573	0.0025	0	0	0.0001	0.0222	0.0016	0.0591	0	0.0162	0.0127
Otu000016	Proteobacteria(100)	Gammaproteobacteria(100)	Pseudomonadales(100)	Moraxellaceae(100)	Acinetobacter(100)	35.4839	0.973548	0	0.2327	0.0001	0	0	0	0.0042	0	0.0001	0.0001	0	0	0.0139	0	0.0006	0	0	0	0.0009	0	0.0013	0	0	0	0	0.0001	0.0478	0	0	0	0
Otu000015	Proteobacteria(100)	Alphaproteobacteria(100)	Rhizobiales(100)	Brucellaceae(100)	unclassified(98)	45.1613	0.77129	0	0.0951	0.0019	0.0015	0	0.0001	0	0	0.0003	0	0.0002	0	0.0004	0	0.1381	0	0.0001	0	0.0003	0.0001	0.0001	0	0	0	0	0.0005	0.0004	0	0	0	0
Otu000013	Firmicutes(100)	Bacilli(100)	Lactobacillales(100)	Streptococcaceae(100)	Streptococcus(100)	9.67742	0.750323	0	0	0	0	0	0	0	0	0	0	0	0	0	0	0	0	0	0.2323	0	0	0	0	0.0002	0	0	0	0	0	0	0.0001	0
Otu000014	Firmicutes(100)	Negativicutes(100)	Selenomonadales(100)	Veillonellaceae(100)	Veillonella(100)	67.7419	0.721935	0.0039	0.0025	0.0001	0.0167	0	0.0595	0	0.0073	0.0019	0.0011	0	0	0.0023	0.0017	0	0.012	0	0.0027	0	0.0015	0.0497	0.0071	0.0018	0.0026	0	0.0235	0.0009	0	0	0.0047	0.0203
Otu000017	Proteobacteria(100)	Gammaproteobacteria(100)	Xanthomonadales(100)	Xanthomonadaceae(100)	Stenotrophomonas(100)	25.8065	0.704194	0	0.0385	0	0	0	0.1399	0	0	0	0	0	0.0167	0.0004	0	0.0203	0	0	0.0001	0	0	0	0	0	0.0021	0	0	0	0	0	0	0.0003
Otu000018	Actinobacteria(100)	Actinobacteria(100)	Actinomycetales(100)	Corynebacteriaceae(100)	Corynebacterium(100)	67.7419	0.501935	0.0021	0	0.0001	0.0001	0	0	0.0001	0.0193	0	0.0004	0.0004	0	0.0005	0.0002	0.0001	0.0103	0.03	0.0011	0.0037	0.0001	0.0009	0.0007	0.0026	0.0817	0	0.0011	0	0	0	0.0001	0
Otu000010	Proteobacteria(100)	Betaproteobacteria(100)	Burkholderiales(100)	Oxalobacteraceae(100)	Massilia(99)	74.1935	0.487742	0	0	0.0052	0.0213	0.0236	0	0	0.0135	0.0003	0.0003	0.0018	0	0.0004	0.0006	0.0003	0	0.0019	0	0.0004	0.0003	0.0006	0.003	0.002	0.0008	0.0005	0.0009	0	0.0649	0.0034	0.0013	0.0039
Otu000019	Actinobacteria(100)	Actinobacteria(100)	Actinomycetales(100)	Corynebacteriaceae(100)	Corynebacterium(100)	87.0968	0.462581	0.0011	0.0001	0.0442	0.0019	0	0.0019	0.002	0.0098	0.001	0.0158	0.0006	0	0.0021	0.0094	0.0067	0.0099	0.0002	0.0062	0.0019	0.001	0	0.0002	0.0114	0.0019	0.0029	0.0098	0.0001	0.0001	0.0011	0.0001	0
Otu000020	Proteobacteria(100)	Gammaproteobacteria(100)	Pseudomonadales(100)	Moraxellaceae(100)	Acinetobacter(100)	6.45161	0.323226	0	0	0	0.0088	0	0	0	0	0	0	0	0	0	0	0.0914	0	0	0	0	0	0	0	0	0	0	0	0	0	0	0	0
Otu000022	Proteobacteria(100)	Gammaproteobacteria(100)	Pseudomonadales(100)	Moraxellaceae(100)	Enhydrobacter(100)	67.7419	0.31871	0.0003	0.0001	0	0.006	0.0091	0.0028	0.0034	0	0.0039	0.0001	0	0	0.0405	0	0.0006	0	0	0.0002	0.0025	0.0006	0.0008	0.0015	0.0008	0.0009	0.001	0.0079	0.0157	0	0	0	0.0001
Otu000023	Bacteroidetes(100)	Flavobacteriia(100)	Flavobacteriales(100)	Flavobacteriaceae(100)	Chryseobacterium(100)	35.4839	0.306452	0	0.0001	0	0.0018	0	0.0002	0.0053	0	0	0	0	0	0.0341	0	0	0	0	0.0003	0.0335	0	0.001	0	0	0.0003	0	0	0.0179	0	0	0.0005	0
Otu000027	Proteobacteria(100)	Alphaproteobacteria(100)	Rhizobiales(100)	Rhizobiaceae(100)	Rhizobium(97)	25.8065	0.296129	0	0.0754	0	0.0003	0	0.0043	0	0	0	0	0	0	0	0	0.0097	0	0	0.0001	0	0	0.0012	0.0001	0	0	0	0	0.0007	0	0	0	0
Otu000021	Firmicutes(100)	Bacilli(100)	Bacillales(100)	Bacillaceae_1(96)	unclassified(93)	80.6452	0.23	0	0	0.008	0.0001	0.0053	0	0.0002	0.0077	0.0008	0.0003	0.0012	0	0.0005	0.0002	0.0004	0.0001	0.0008	0	0.0006	0	0.001	0.0011	0.0009	0.0005	0.0005	0.001	0.0001	0.0324	0.0033	0.0005	0.0038
Otu000026	Actinobacteria(100)	Actinobacteria(100)	Actinomycetales(100)	Propionibacteriaceae(100)	Propionibacterium(100)	83.871	0.211935	0	0	0.0017	0.0025	0	0.0016	0.0006	0.0016	0.0001	0.0045	0.0018	0.0001	0.0169	0	0.0064	0.0012	0.0009	0.0008	0	0.0009	0.0008	0.0001	0.0005	0.0008	0.0006	0.0053	0.0004	0.0125	0.0002	0.0005	0.0024
Otu000025	Actinobacteria(100)	Actinobacteria(100)	Actinomycetales(100)	Corynebacteriaceae(100)	Corynebacterium(100)	41.9355	0.209032	0.0002	0	0.0022	0.0004	0	0	0	0	0.0012	0	0.0004	0	0.0008	0	0	0	0.0001	0.0127	0.038	0.0039	0.0006	0	0.0039	0.0004	0	0	0	0	0	0	0
Otu000030	Proteobacteria(100)	Gammaproteobacteria(100)	Xanthomonadales(100)	Xanthomonadaceae(100)	Stenotrophomonas(100)	12.9032	0.208387	0	0.0377	0	0	0	0.0267	0	0	0	0.0001	0	0	0	0	0	0	0	0	0	0	0	0	0.0001	0	0	0	0	0	0	0	0
Otu000009	Actinobacteria(100)	Actinobacteria(100)	Actinomycetales(100)	Microbacteriaceae(100)	Leifsonia(100)	77.4194	0.203226	0	0	0.0051	0.0027	0.0056	0	0.0001	0.0102	0.0001	0.0002	0.0001	0	0.0003	0.0004	0	0	0.0008	0	0.0018	0.0001	0.0004	0.0018	0.001	0.0012	0.0001	0.0004	0.0001	0.0235	0.0042	0.0014	0.0014
Otu000041	Bacteroidetes(100)	Flavobacteriia(100)	Flavobacteriales(100)	Flavobacteriaceae(100)	Chryseobacterium(100)	9.67742	0.195161	0	0.057	0	0	0	0.0016	0	0	0	0	0	0	0	0	0	0	0	0	0	0	0	0	0	0	0	0.0019	0	0	0	0	0
Otu000028	Firmicutes(100)	Clostridia(100)	Clostridiales(100)	Clostridiales_Incertae_Sedis_XI(100)	Anaerococcus(100)	25.8065	0.174194	0.0012	0	0	0	0	0	0	0.0026	0	0	0	0	0	0	0	0.0009	0	0	0.0013	0.0003	0	0	0.0003	0.0449	0	0.0025	0	0	0	0	0
Otu000029	Proteobacteria(100)	Betaproteobacteria(100)	Burkholderiales(100)	Comamonadaceae(100)	Comamonas(99)	16.129	0.114839	0	0	0	0	0	0.0072	0	0	0	0	0	0	0	0	0	0	0	0	0	0	0	0	0	0	0	0	0.0281	0.0001	0.0001	0.0001	0
Otu000033	Firmicutes(100)	Bacilli(100)	Lactobacillales(100)	Lactobacillaceae(100)	Lactobacillus(100)	12.9032	0.113226	0	0	0	0	0	0	0	0	0	0.0015	0	0	0	0	0	0	0	0	0.0005	0	0	0	0.0014	0.0317	0	0	0	0	0	0	0
Otu000024	Firmicutes(100)	Bacilli(100)	Lactobacillales(100)	Lactobacillaceae(100)	Lactobacillus(100)	35.4839	0.104839	0.0004	0	0.0025	0	0.0044	0	0	0.0028	0.0001	0.01	0	0	0	0.0002	0	0	0	0	0	0	0.0009	0	0	0	0	0.0043	0	0	0.0055	0.0014	0
Otu000045	Proteobacteria(100)	Alphaproteobacteria(100)	Caulobacterales(100)	Caulobacteraceae(100)	Brevundimonas(100)	16.129	0.102581	0	0	0	0.0002	0	0.0259	0	0.0001	0	0	0	0	0	0	0.0053	0	0	0	0	0	0	0	0	0	0	0.0003	0	0	0	0	0
Otu000053	Firmicutes(100)	Negativicutes(100)	Selenomonadales(100)	Veillonellaceae(100)	Veillonella(100)	12.9032	0.0987097	0	0.0007	0	0.0161	0	0.0121	0	0	0	0	0	0	0	0	0	0	0	0	0	0	0	0	0	0.0017	0	0	0	0	0	0	0
Otu000038	Proteobacteria(100)	Gammaproteobacteria(100)	Pasteurellales(100)	Pasteurellaceae(100)	Haemophilus(100)	32.2581	0.0909677	0	0	0	0	0	0	0	0.001	0	0	0	0	0.0007	0	0	0.0047	0.0005	0.0001	0	0	0.0025	0.0001	0	0	0.0001	0.0005	0	0	0	0.018	0
Otu000036	Proteobacteria(100)	Betaproteobacteria(100)	Neisseriales(100)	Neisseriaceae(100)	Neisseria(99)	25.8065	0.0890323	0	0	0	0	0	0	0	0	0	0	0	0	0.0018	0	0	0.0051	0.0002	0.0004	0	0	0.0005	0	0	0	0.0003	0.0051	0	0	0	0.0142	0
Otu000070	Actinobacteria(100)	Actinobacteria(100)	Bifidobacteriales(100)	Bifidobacteriaceae(100)	Bifidobacterium(100)	12.9032	0.0829032	0	0	0	0.0213	0	0.0039	0	0	0	0.0002	0	0	0	0	0	0	0	0	0.0003	0	0	0	0	0	0	0	0	0	0	0	0
Otu000040	Actinobacteria(100)	Actinobacteria(100)	Actinomycetales(100)	Actinomycetaceae(100)	Actinomyces(100)	25.8065	0.0822581	0	0.0003	0	0	0	0	0	0	0	0	0	0	0.001	0	0	0.0004	0	0.0002	0	0.0006	0	0	0	0	0	0.0101	0.0014	0	0	0.0115	0
Otu000039	Actinobacteria(100)	Actinobacteria(100)	Actinomycetales(100)	Micrococcaceae(100)	Rothia(100)	25.8065	0.0819355	0	0	0	0	0	0	0.0001	0	0	0	0	0	0.0001	0	0	0.0004	0.0001	0.0001	0.0001	0	0	0	0	0	0	0.0238	0	0	0	0	0.0007
Otu000034	Firmicutes(100)	Bacilli(100)	Lactobacillales(100)	Lactobacillaceae(100)	Lactobacillus(100)	38.7097	0.0803226	0	0	0.0031	0	0	0	0	0	0	0	0.0037	0	0	0.0005	0	0.0013	0.0001	0	0.0031	0.0014	0	0.0018	0.0013	0.0052	0	0	0	0	0.0028	0.0006	0
Otu000042	Proteobacteria(100)	Gammaproteobacteria(100)	Pseudomonadales(100)	Pseudomonadaceae(100)	Pseudomonas(98)	29.0323	0.08	0	0	0	0.0001	0	0.0211	0	0	0.0003	0	0	0	0.0007	0	0	0.0003	0.0007	0	0	0	0	0	0	0.0012	0	0	0.0003	0	0	0	0.0001
Otu000049	Proteobacteria(100)	Alphaproteobacteria(100)	Sphingomonadales(100)	Sphingomonadaceae(100)	Sphingobium(100)	6.45161	0.0790323	0	0	0	0	0	0.0211	0	0	0	0	0	0	0	0	0	0	0	0	0	0	0	0	0	0	0	0.0034	0	0	0	0	0
Otu000035	Firmicutes(100)	Bacilli(100)	Lactobacillales(100)	Lactobacillaceae(100)	Lactobacillus(100)	3.22581	0.0754839	0	0	0	0	0	0	0	0	0	0	0	0	0	0	0	0	0	0	0	0	0	0	0	0	0	0.0234	0	0	0	0	0
Otu000047	Actinobacteria(100)	Actinobacteria(100)	Bifidobacteriales(100)	Bifidobacteriaceae(100)	Bifidobacterium(100)	9.67742	0.0741935	0	0	0	0	0	0	0	0	0	0	0	0	0	0	0	0.0009	0	0	0	0	0	0	0	0.0219	0	0	0	0	0	0	0.0002
Otu000068	Bacteroidetes(100)	Sphingobacteriia(100)	Sphingobacteriales(100)	Sphingobacteriaceae(100)	Sphingobacterium(100)	3.22581	0.0725806	0	0.0225	0	0	0	0	0	0	0	0	0	0	0	0	0	0	0	0	0	0	0	0	0	0	0	0	0	0	0	0	0
Otu000044	Firmicutes(100)	Bacilli(100)	Lactobacillales(100)	Carnobacteriaceae(100)	Granulicatella(100)	22.5806	0.0703226	0	0	0	0.0004	0	0	0	0	0	0	0	0	0.0007	0	0	0.0046	0.0003	0	0.0003	0	0.0001	0	0	0	0	0.0154	0	0	0	0	0
Otu000056	Actinobacteria(100)	Actinobacteria(100)	Actinomycetales(100)	Micrococcaceae(100)	Rothia(100)	19.3548	0.0674194	0	0	0	0.0011	0	0	0	0.0109	0	0	0	0	0	0	0	0.0008	0.0051	0.0015	0	0	0	0	0	0.0015	0	0	0	0	0	0	0
Otu000032	Proteobacteria(100)	Alphaproteobacteria(100)	Rhodospirillales(100)	Reyranella(100)	unclassified(100)	61.2903	0.0651613	0	0	0.0007	0.0011	0.0031	0	0	0.0046	0.0001	0.0001	0	0	0.0001	0.0003	0.0006	0.0003	0	0	0.0003	0	0.0004	0.0018	0.0007	0.0009	0.0006	0.0004	0	0	0.0038	0	0.0003
Otu000052	Actinobacteria(100)	Actinobacteria(100)	Bifidobacteriales(100)	Bifidobacteriaceae(100)	Bifidobacterium(100)	6.45161	0.0609677	0	0	0	0	0	0	0	0	0	0	0	0	0	0	0	0	0	0	0	0	0	0	0	0.0186	0.0003	0	0	0	0	0	0
Otu000046	Proteobacteria(100)	Betaproteobacteria(100)	Burkholderiales(100)	Oxalobacteraceae(100)	Herbaspirillum(100)	61.2903	0.056129	0	0	0	0	0.0013	0	0	0.0023	0.0003	0	0.0005	0	0.0001	0.0001	0.0003	0	0	0	0.0001	0	0.0001	0.0005	0.0005	0.0005	0.0002	0.0008	0.0001	0.0056	0.0019	0.0006	0.0016
Otu000031	unclassified(100)	unclassified(100)	unclassified(100)	unclassified(100)	unclassified(100)	54.8387	0.056129	0	0.0001	0	0.0021	0.0083	0	0.001	0	0.0002	0.0002	0.0001	0	0.0012	0.0006	0.0002	0	0	0.0002	0.0001	0	0	0.0002	0	0	0	0	0.0004	0.0001	0.0013	0	0.0011
Otu000048	Proteobacteria(100)	Gammaproteobacteria(100)	Aeromonadales(100)	Aeromonadaceae(100)	Aeromonas(100)	19.3548	0.0551613	0	0	0	0	0	0.0078	0	0	0.0009	0	0	0	0.0013	0	0	0	0	0.0001	0.0009	0	0	0	0	0	0	0	0.0061	0	0	0	0
Otu000054	Actinobacteria(100)	Actinobacteria(100)	Actinomycetales(100)	Micrococcaceae(100)	Micrococcus(98)	41.9355	0.0532258	0	0	0	0.0027	0	0	0.0001	0.0012	0.0006	0	0	0	0.0003	0	0.0014	0	0.0033	0	0	0	0.0001	0.0017	0	0.0005	0.0024	0.0018	0	0	0	0.0004	0
Otu000043	Proteobacteria(100)	Alphaproteobacteria(100)	Rhodobacterales(100)	Rhodobacteraceae(100)	Paracoccus(99)	51.6129	0.0512903	0.0001	0	0	0.0003	0	0.0001	0.0012	0.0045	0	0.0001	0	0	0.0003	0	0	0.0001	0.0003	0	0.002	0	0	0.0001	0.0002	0.0001	0	0.0008	0.0039	0	0	0	0.0018
Otu000055	Actinobacteria(100)	Actinobacteria(100)	Actinomycetales(100)	Corynebacteriaceae(99)	Corynebacterium(98)	22.5806	0.0503226	0.0005	0	0	0	0	0	0	0	0	0.0012	0	0	0	0	0.0059	0	0	0.0017	0.0006	0	0	0	0	0.0018	0	0.0039	0	0	0	0	0
Otu000062	Actinobacteria(100)	Actinobacteria(100)	Bifidobacteriales(100)	Bifidobacteriaceae(100)	Bifidobacterium(100)	19.3548	0.0487097	0	0	0	0	0	0.0052	0	0	0.0008	0	0.0022	0	0	0	0	0	0	0	0	0	0	0	0	0.0004	0	0.0014	0	0	0	0	0.0051
Otu000063	Proteobacteria(100)	Alphaproteobacteria(100)	Rhizobiales(100)	Methylobacteriaceae(100)	Methylobacterium(100)	19.3548	0.0435484	0	0	0	0	0.0001	0	0.0001	0.0127	0	0	0	0	0	0	0	0	0	0.0001	0.0001	0	0	0.0004	0	0	0	0	0	0	0	0	0
Otu000050	Firmicutes(100)	Clostridia(100)	Clostridiales(100)	Clostridiales_Incertae_Sedis_XI(100)	Finegoldia(100)	22.5806	0.0429032	0	0	0	0	0	0	0.0003	0	0	0	0	0	0.0014	0.0003	0	0.0002	0	0	0	0	0	0.002	0.0025	0	0	0.0066	0	0	0	0	0
Otu000088	Proteobacteria(100)	Alphaproteobacteria(100)	Sphingomonadales(100)	Sphingomonadaceae(100)	Sphingobium(98)	12.9032	0.0409677	0	0.0001	0	0.0007	0	0.0078	0	0	0	0	0	0	0	0	0	0	0	0	0	0	0	0	0	0	0	0	0	0.0041	0	0	0
Otu000092	Proteobacteria(100)	Alphaproteobacteria(100)	Caulobacterales(100)	Caulobacteraceae(100)	Brevundimonas(100)	16.129	0.0393548	0	0.011	0	0	0	0.0009	0	0	0	0	0	0	0	0	0.0001	0	0	0	0	0.0001	0	0	0	0	0	0	0.0001	0	0	0	0
Otu000058	Proteobacteria(100)	Gammaproteobacteria(100)	Enterobacteriales(100)	Enterobacteriaceae(100)	Escherichia/Shigella(100)	25.8065	0.0370968	0	0	0	0	0	0	0	0	0	0.0006	0	0.0064	0.0017	0.0004	0.0002	0	0	0	0	0.0003	0	0.0012	0	0	0	0.0007	0	0	0	0	0
Otu000078	Bacteroidetes(100)	Flavobacteriia(100)	Flavobacteriales(100)	Flavobacteriaceae(100)	Chishuiella(100)	3.22581	0.0364516	0	0	0	0	0	0.0113	0	0	0	0	0	0	0	0	0	0	0	0	0	0	0	0	0	0	0	0	0	0	0	0	0
Otu000072	Actinobacteria(100)	Actinobacteria(100)	Actinomycetales(100)	Corynebacteriaceae(100)	Corynebacterium(100)	6.45161	0.0354839	0	0	0	0	0	0	0	0	0	0	0	0	0	0	0	0	0	0	0	0	0	0	0	0.0109	0.0001	0	0	0	0	0	0
Otu000051	Actinobacteria(100)	Actinobacteria(100)	Actinomycetales(100)	Actinomycetaceae(100)	Actinomyces(100)	6.45161	0.0348387	0	0	0	0	0	0	0	0	0	0	0	0	0	0.0056	0	0	0	0	0	0	0	0	0	0	0	0.0052	0	0	0	0	0
Otu000071	Firmicutes(100)	Negativicutes(100)	Selenomonadales(100)	Veillonellaceae(100)	Veillonella(99)	22.5806	0.0348387	0	0	0	0	0.0011	0	0	0.0011	0.0007	0	0	0	0.0055	0	0.0001	0.0011	0	0	0	0	0	0	0	0.0012	0	0	0	0	0	0	0
Otu000066	Proteobacteria(100)	Betaproteobacteria(100)	Burkholderiales(100)	Comamonadaceae(100)	Delftia(100)	22.5806	0.0341935	0	0.0073	0.001	0.0001	0	0	0.0001	0	0	0	0	0	0	0.0003	0	0	0	0	0	0	0	0	0	0	0	0.0005	0	0	0.0013	0	0
Otu000079	Proteobacteria(100)	Betaproteobacteria(100)	Neisseriales(100)	Neisseriaceae(100)	unclassified(100)	9.67742	0.0332258	0	0	0	0.0012	0	0	0	0	0	0	0	0	0.007	0	0	0	0	0	0.0021	0	0	0	0	0	0	0	0	0	0	0	0
Otu000059	Firmicutes(100)	Bacilli(100)	Lactobacillales(100)	Streptococcaceae(100)	Streptococcus(100)	12.9032	0.0325806	0	0	0	0	0	0	0.0002	0	0	0	0	0	0	0	0	0.0004	0	0	0	0	0	0	0	0	0	0.0045	0	0	0	0.005	0
Otu000060	Firmicutes(100)	Clostridia(100)	Clostridiales(100)	Clostridiales_Incertae_Sedis_XI(100)	Anaerococcus(100)	22.5806	0.0325806	0	0	0	0	0	0	0.0001	0	0	0	0	0	0.0041	0	0	0.0002	0	0	0	0	0.0003	0.0023	0.0014	0	0	0.0017	0	0	0	0	0
Otu000115	Firmicutes(100)	Bacilli(100)	Lactobacillales(100)	Streptococcaceae(100)	Lactococcus(100)	6.45161	0.0322581	0	0.0001	0	0.0099	0	0	0	0	0	0	0	0	0	0	0	0	0	0	0	0	0	0	0	0	0	0	0	0	0	0	0
Otu000065	Firmicutes(100)	Clostridia(100)	Clostridiales(100)	Peptoniphilaceae(100)	Peptoniphilus(100)	29.0323	0.0312903	0	0	0	0.0002	0	0	0.0002	0	0	0	0	0	0.0014	0	0.0008	0.0008	0	0	0.0003	0	0.0003	0.0011	0	0	0	0.0046	0	0	0	0	0
Otu000085	Actinobacteria(100)	Actinobacteria(100)	Actinomycetales(100)	Corynebacteriaceae(100)	Corynebacterium(100)	12.9032	0.0293548	0.0007	0	0	0	0	0	0	0.0066	0	0	0	0	0	0	0	0	0	0	0	0	0	0	0.0003	0.0015	0	0	0	0	0	0	0
Otu000037	Proteobacteria(100)	Betaproteobacteria(100)	Burkholderiales(100)	Burkholderiaceae(100)	Ralstonia(100)	48.3871	0.0283871	0	0	0	0.0001	0	0	0	0	0.0004	0	0.0005	0	0	0.0001	0.0001	0.0001	0	0	0.0004	0	0.0013	0	0.0002	0.0015	0.0004	0.0004	0	0	0.0007	0.0011	0.0015
Otu000074	Firmicutes(100)	Clostridia(100)	Clostridiales(100)	Ruminococcaceae(100)	Faecalibacterium(100)	12.9032	0.0258065	0	0	0	0	0	0	0	0.0062	0	0	0	0	0	0	0	0	0.0007	0	0	0	0	0	0	0	0	0.0008	0	0	0	0	0.0003
Otu000102	Actinobacteria(100)	Actinobacteria(100)	Bifidobacteriales(100)	Bifidobacteriaceae(100)	Scardovia(100)	9.67742	0.0254839	0	0	0	0	0	0.0067	0	0	0	0	0	0	0.0004	0	0	0	0	0	0	0	0	0	0	0	0	0	0	0	0	0.0008	0
Otu000083	Actinobacteria(100)	Actinobacteria(100)	Actinomycetales(100)	Corynebacteriaceae(100)	Corynebacterium(100)	16.129	0.0251613	0	0	0	0	0	0	0	0.0012	0	0.0003	0	0	0	0	0	0	0	0	0	0	0	0	0.0009	0.0046	0	0.0008	0	0	0	0	0
Otu000099	Bacteroidetes(100)	Flavobacteriia(100)	Flavobacteriales(100)	Flavobacteriaceae(100)	Chryseobacterium(100)	3.22581	0.0251613	0	0	0	0	0	0.0078	0	0	0	0	0	0	0	0	0	0	0	0	0	0	0	0	0	0	0	0	0	0	0	0	0
Otu000067	Candidatus_Saccharibacteria(100)	unclassified(100)	unclassified(100)	unclassified(100)	unclassified(100)	12.9032	0.0245161	0	0	0	0	0	0	0	0	0	0	0	0	0.0005	0	0.0001	0.0034	0	0	0	0	0	0	0	0	0	0.0036	0	0	0	0	0
Otu000122	Firmicutes(100)	Bacilli(100)	Lactobacillales(100)	Streptococcaceae(100)	Lactococcus(100)	9.67742	0.0241935	0	0	0.0007	0.0067	0	0	0	0	0	0	0	0	0	0	0	0	0	0	0	0	0	0	0	0	0	0	0	0	0	0.0001	0
Otu000097	Bacteroidetes(100)	Sphingobacteriia(100)	Sphingobacteriales(100)	Sphingobacteriaceae(100)	Sphingobacterium(100)	16.129	0.023871	0	0.0001	0	0	0	0.0061	0	0	0	0	0	0.0004	0.0007	0	0	0	0	0.0001	0	0	0	0	0	0	0	0	0	0	0	0	0
Otu000077	Proteobacteria(100)	Betaproteobacteria(100)	Burkholderiales(100)	Burkholderiaceae(100)	Lautropia(100)	12.9032	0.0235484	0	0	0	0	0	0	0	0	0	0	0	0	0.0005	0	0	0	0	0.0001	0	0	0	0	0	0	0	0.0066	0.0001	0	0	0	0
Otu000075	Actinobacteria(100)	Actinobacteria(100)	Actinomycetales(100)	Actinomycetaceae(100)	Actinomyces(100)	25.8065	0.0229032	0	0	0	0	0	0	0.0002	0.0001	0	0	0	0	0.0002	0	0	0.0012	0	0.0003	0	0	0	0	0	0	0	0.0045	0.0001	0	0.0005	0	0
Otu000111	Firmicutes(100)	Bacilli(100)	Lactobacillales(100)	Carnobacteriaceae(100)	Dolosigranulum(100)	19.3548	0.0216129	0	0	0.0039	0.0008	0	0	0	0	0.0005	0	0.0008	0	0.0001	0	0	0	0	0	0	0	0	0	0	0.0006	0	0	0	0	0	0	0
Otu000057	Firmicutes(100)	Bacilli(100)	Bacillales(100)	Bacillaceae_1(71)	Bacillus(71)	25.8065	0.0206452	0	0	0.0003	0	0	0	0	0	0	0	0.0007	0	0	0	0	0.0001	0	0.0001	0	0	0	0	0.0007	0	0	0	0	0.0036	0.0002	0	0.0007
Otu000094	Proteobacteria(100)	Gammaproteobacteria(100)	Pasteurellales(100)	Pasteurellaceae(100)	Haemophilus(100)	19.3548	0.0203226	0	0	0	0	0	0	0	0.0027	0	0	0	0	0	0	0	0.0015	0.0001	0	0	0	0	0	0.0004	0	0.0014	0.0002	0	0	0	0	0
Otu000082	Actinobacteria(100)	Actinobacteria(100)	Actinomycetales(100)	Actinomycetaceae(100)	Actinomyces(100)	22.5806	0.0203226	0	0.0001	0	0	0	0	0	0	0.0001	0.0014	0	0	0.0003	0	0	0	0	0	0	0.0013	0	0	0	0.0006	0	0.0025	0	0	0	0	0
Otu000106	Firmicutes(100)	Bacilli(100)	Lactobacillales(100)	Lactobacillaceae(99)	Lactobacillus(99)	3.22581	0.02	0	0	0	0	0	0	0	0	0	0	0.0062	0	0	0	0	0	0	0	0	0	0	0	0	0	0	0	0	0	0	0	0
Otu000086	Firmicutes(100)	Bacilli(100)	Lactobacillales(100)	Streptococcaceae(100)	Streptococcus(100)	6.45161	0.0190323	0	0	0	0	0	0	0	0	0	0	0	0	0	0	0	0.0001	0	0	0	0	0	0	0	0	0	0.0058	0	0	0	0	0
Otu000104	Firmicutes(100)	Negativicutes(100)	Selenomonadales(100)	Veillonellaceae(100)	Dialister(100)	9.67742	0.0180645	0	0	0	0	0	0	0	0	0	0	0	0	0.0029	0	0	0	0	0	0	0	0	0.0006	0	0	0	0.0021	0	0	0	0	0
Otu000087	Firmicutes(100)	Clostridia(100)	Clostridiales(100)	Clostridiales_Incertae_Sedis_XI(100)	Anaerococcus(100)	12.9032	0.0174194	0	0	0	0	0	0	0	0	0	0	0	0	0.0031	0	0	0	0	0	0	0	0	0.0007	0.0005	0	0	0.0011	0	0	0	0	0
Otu000080	Proteobacteria(100)	Betaproteobacteria(100)	Neisseriales(100)	Neisseriaceae(100)	Neisseria(100)	9.67742	0.016129	0	0	0	0	0	0	0	0	0	0	0	0	0.0001	0	0	0.0002	0	0	0	0	0	0	0	0	0	0.0047	0	0	0	0	0
Otu000098	Firmicutes(100)	Bacilli(100)	Bacillales(100)	Staphylococcaceae(98)	Staphylococcus(98)	35.4839	0.016129	0.0003	0	0	0	0	0	0	0	0.0021	0.0003	0	0	0	0.0011	0	0	0.0001	0.0002	0.0003	0	0.0001	0	0.0001	0	0	0.0003	0	0	0	0.0001	0
Otu000089	Proteobacteria(100)	Gammaproteobacteria(100)	Pseudomonadales(100)	Moraxellaceae(100)	Acinetobacter(100)	19.3548	0.0158065	0	0	0	0.001	0	0.0014	0	0	0.0002	0	0	0	0.0001	0	0	0	0	0	0.002	0	0	0	0	0	0	0	0.0002	0	0	0	0
Otu000107	Actinobacteria(100)	Actinobacteria(100)	Actinomycetales(100)	Micrococcaceae(100)	Kocuria(100)	19.3548	0.0154839	0	0	0	0.0005	0	0	0	0.0038	0	0	0	0	0	0	0	0.0001	0	0	0	0	0	0	0	0	0.0001	0.0002	0	0	0	0.0001	0
Otu000061	Firmicutes(100)	Bacilli(100)	Lactobacillales(100)	Enterococcaceae(100)	Enterococcus(98)	9.67742	0.0141935	0	0	0	0	0	0	0	0	0	0	0	0	0	0.0001	0	0	0	0	0	0	0	0.002	0	0	0	0.0023	0	0	0	0	0
Otu000073	Bacteroidetes(100)	Bacteroidia(100)	Bacteroidales(100)	Bacteroidaceae(100)	Bacteroides(100)	9.67742	0.013871	0	0	0	0	0	0	0	0	0	0	0	0	0	0	0	0	0	0	0	0	0	0	0.0003	0.0018	0	0	0	0	0	0	0.0022
Otu000101	Bacteroidetes(100)	Flavobacteriia(100)	Flavobacteriales(100)	Flavobacteriaceae(100)	Chryseobacterium(100)	3.22581	0.0135484	0	0	0	0	0	0	0	0	0	0	0	0	0	0	0	0	0	0	0	0	0	0	0	0	0	0.0042	0	0	0	0	0
Otu000110	Firmicutes(100)	Clostridia(100)	Clostridiales(100)	Peptoniphilaceae(100)	Peptoniphilus(100)	12.9032	0.0135484	0	0	0	0	0	0	0.0002	0	0	0	0	0	0.0017	0	0	0	0	0	0	0	0	0.0016	0	0	0	0.0007	0	0	0	0	0
Otu000121	Firmicutes(100)	Bacilli(100)	Lactobacillales(100)	Streptococcaceae(100)	Streptococcus(100)	29.0323	0.0129032	0.0006	0	0.0009	0.0004	0	0.0001	0	0	0	0.0001	0	0	0	0	0.0002	0	0	0	0	0	0.0002	0	0	0	0	0.0005	0	0	0	0	0.001
Otu000093	Proteobacteria(100)	Gammaproteobacteria(100)	Oceanospirillales(100)	Alcanivoracaceae(100)	Alcanivorax(100)	19.3548	0.0122581	0	0	0	0	0	0	0	0.001	0	0	0	0	0	0	0	0	0	0	0	0	0.0002	0.0001	0	0	0	0.0001	0	0	0.0006	0	0.0018
Otu000112	Firmicutes(100)	Bacilli(100)	Bacillales(100)	Bacillaceae_1(96)	Bacillus(96)	12.9032	0.0122581	0	0	0	0	0	0	0	0	0	0	0	0	0	0	0	0	0	0	0	0	0.0004	0	0.0003	0	0	0	0	0.0028	0	0.0003	0
Otu000113	Firmicutes(100)	Bacilli(100)	Lactobacillales(100)	Lactobacillaceae(100)	Lactobacillus(100)	9.67742	0.0119355	0	0	0	0.0002	0	0	0	0	0	0	0	0	0	0	0	0	0	0	0	0	0	0	0	0.0033	0.0002	0	0	0	0	0	0
Otu000124	Proteobacteria(100)	Gammaproteobacteria(100)	Vibrionales(100)	Vibrionaceae(100)	Photobacterium(100)	6.45161	0.0119355	0	0	0	0	0	0	0	0	0	0.0032	0	0	0	0	0	0	0	0	0	0	0	0	0	0	0	0.0005	0	0	0	0	0
Otu000114	Firmicutes(100)	Bacilli(100)	Lactobacillales(100)	Aerococcaceae(100)	Abiotrophia(100)	22.5806	0.0112903	0	0	0	0.0007	0	0	0.0004	0	0	0	0	0	0.0001	0	0.0002	0.0011	0.0001	0	0	0	0	0	0	0	0	0.0009	0	0	0	0	0
Otu000118	Actinobacteria(100)	Actinobacteria(100)	Coriobacteriales(100)	Coriobacteriaceae(100)	Atopobium(100)	16.129	0.0109677	0	0.0001	0	0	0	0	0	0.0005	0.0002	0	0	0	0	0	0	0	0	0	0	0	0	0.0013	0	0	0	0.0013	0	0	0	0	0
Otu000100	Proteobacteria(100)	Alphaproteobacteria(100)	Sphingomonadales(100)	Sphingomonadaceae(100)	Sphingomonas(100)	16.129	0.0106452	0	0.0002	0	0	0	0	0	0.0022	0	0	0.0002	0	0	0	0	0	0	0	0	0	0	0	0	0	0	0.0003	0	0	0	0.0004	0
Otu000076	Firmicutes(100)	Clostridia(100)	Clostridiales(100)	Clostridiales_Incertae_Sedis_XI(100)	Anaerococcus(100)	12.9032	0.0106452	0	0	0	0	0	0	0	0.0017	0	0	0	0	0	0	0	0.0003	0	0.0001	0	0	0	0	0	0	0	0.0012	0	0	0	0	0
Otu000120	Bacteroidetes(100)	Flavobacteriia(100)	Flavobacteriales(100)	Flavobacteriaceae(100)	unclassified(100)	29.0323	0.01	0.0001	0	0	0.0006	0	0	0	0	0	0.0002	0	0	0.0007	0	0	0.0004	0	0	0	0.0005	0	0.0002	0	0	0	0.0003	0.0001	0	0	0	0
Otu000108	Bacteroidetes(100)	Bacteroidia(100)	Bacteroidales(100)	Prevotellaceae(100)	Prevotella(100)	6.45161	0.00903226	0	0	0	0	0	0	0	0	0	0	0	0	0	0	0	0	0	0	0	0	0	0	0	0	0	0.0019	0	0	0	0.0009	0
Otu000064	Proteobacteria(100)	Alphaproteobacteria(100)	Sphingomonadales(100)	Erythrobacteraceae(100)	unclassified(95)	22.5806	0.00709677	0	0	0	0	0	0	0.0001	0	0	0	0.0001	0	0	0	0.0001	0	0	0	0.0002	0	0.0006	0	0	0	0	0	0	0.0002	0	0	0.0009
Otu000105	Actinobacteria(100)	Actinobacteria(100)	Actinomycetales(100)	Microbacteriaceae(100)	Microbacterium(97)	12.9032	0.00612903	0	0	0	0	0	0	0.0001	0	0	0	0	0	0.0003	0	0	0	0	0	0	0	0	0	0	0	0	0.0012	0	0	0.0003	0	0
Otu000069	Bacteroidetes(100)	Flavobacteriia(100)	Flavobacteriales(100)	Flavobacteriaceae(100)	Cloacibacterium(100)	9.67742	0.00451613	0	0	0.0008	0	0	0	0.0001	0	0	0	0	0	0	0	0	0	0.0005	0	0	0	0	0	0	0	0	0	0	0	0	0	0
Otu000119	Proteobacteria(100)	Gammaproteobacteria(100)	Pseudomonadales(100)	Pseudomonadaceae(100)	Pseudomonas(100)	12.9032	0.00451613	0	0	0	0	0	0.0003	0	0	0	0	0	0	0	0	0	0	0	0	0	0	0	0	0	0	0.0001	0	0.0001	0	0.0009	0	0
Otu000090	Firmicutes(100)	Bacilli(100)	Lactobacillales(100)	Lactobacillaceae(100)	Lactobacillus(100)	16.129	0.00419355	0	0	0	0	0	0	0	0	0	0	0	0	0	0	0	0.0001	0	0	0	0	0.0004	0	0.0002	0	0	0	0	0	0.0005	0.0001	0
Otu000117	Bacteroidetes(100)	Bacteroidia(100)	Bacteroidales(100)	Bacteroidaceae(100)	Bacteroides(100)	3.22581	0.00225806	0	0	0	0	0	0	0	0	0	0	0	0	0	0	0	0	0	0	0	0	0	0	0	0.0007	0	0	0	0	0	0	0
Otu000091	Proteobacteria(100)	Alphaproteobacteria(100)	Rhizobiales(100)	Phyllobacteriaceae(100)	Mesorhizobium(98)	6.45161	0.00193548	0	0	0	0	0	0	0	0	0	0	0	0	0	0	0	0	0	0	0.0005	0.0001	0	0	0	0	0	0	0	0	0	0	0
Otu000123	Proteobacteria(100)	Betaproteobacteria(100)	Burkholderiales(100)	Burkholderiales_incertae_sedis(100)	Aquabacterium(100)	6.45161	0.0016129	0	0	0	0	0	0	0	0	0	0	0.0003	0	0	0	0	0	0	0	0	0	0.0002	0	0	0	0	0	0	0	0	0	0
Otu000081	Firmicutes(100)	Clostridia(100)	Clostridiales(100)	Clostridiaceae_1(100)	Clostridium_sensu_stricto(100)	3.22581	0.000645161	0	0	0	0	0	0	0	0	0	0	0	0	0	0	0	0	0.0002	0	0	0	0	0	0	0	0	0	0	0	0	0	0

## Sheet: Table S4
Table S4: Relative abundance of each genera per sample.
OTUs were binned according to taxonomic classification. Each sample was subsampled to 10000 reads/sample. Sample s07 was excluded during this step. Taxonomy is infered with RDP reference base (mothur, trainset16). OTUs that included less than 0.01 % of total reads obtained were removed.
Group	Size	Phylum	Class	Order	Family	Genus	Prevalence [%]	Average abundance [%]	s01	s02	s03	s05	s08	s09	s10	s11	s12	s13	s14	s15	s16	s17	s18	s19	s20	s21	s22	s23	s24	s25	s26	s27	s28	s29	s30	s31	s32	s33	s34	Group
Otu002	618027	Firmicutes	Bacilli	Bacillales	Staphylococcaceae	Staphylococcus	100	35.6219	0.4703	0.0542	0.0894	0.0797	0.404	0.0261	0.0991	0.5009	0.4362	0.601	0.1877	0.3444	0.2224	0.6732	0.1328	0.026	0.7435	0.6774	0.7476	0.4046	0.0775	0.2195	0.6753	0.1425	0.9395	0.3291	0.0236	0.0188	0.8152	0.3331	0.5482	Otu002
Otu001	610472	Firmicutes	Bacilli	Lactobacillales	Streptococcaceae	Streptococcus	100	35.4484	0.4181	0.0158	0.639	0.6094	0.2423	0.329	0.858	0.2047	0.5116	0.326	0.7659	0.0046	0.5564	0.2434	0.0314	0.7588	0.0776	0.2832	0.0944	0.5579	0.617	0.6961	0.2361	0.5403	0.0139	0.383	0.1401	0.0011	0.0543	0.4622	0.3174	Otu001
Otu003	167285	Proteobacteria	Gammaproteobacteria	Pseudomonadales	Moraxellaceae	Acinetobacter	80.6452	8.25645	0.0001	0.2263	0.0008	0.0173	0.0295	0.2135	0.0036	0.002	0.0115	0.0002	0	0.6234	0.0372	0	0.6223	0.0002	0	0.001	0.0396	0	0.0064	0.0002	0.0001	0.0031	0.0012	0.028	0.6913	0.0006	0.0001	0	0	Otu003
Otu008	51302	Proteobacteria	Gammaproteobacteria	Pseudomonadales	Pseudomonadaceae	Pseudomonas	100	3.59742	0.001	0.0031	0.0861	0.0718	0.1344	0.0195	0.0048	0.0848	0.0074	0.0039	0.0064	0.0002	0.0064	0.0044	0.003	0.0028	0.01	0.0009	0.0133	0.0023	0.0086	0.0252	0.0172	0.0207	0.0044	0.0078	0.004	0.4359	0.0668	0.0189	0.0392	Otu008
Otu004	46707	Firmicutes	Bacilli	Bacillales	Bacillales_Incertae_Sedis_XI	Gemella	93.5484	2.67194	0.0923	0.0001	0.0012	0.0579	0.054	0.0004	0.0017	0.0254	0.0066	0.0006	0.0006	0	0.0164	0.0476	0.0007	0.1268	0.0237	0.0002	0.0004	0.0163	0.1673	0.0063	0.0163	0.0308	0.0162	0.0045	0.009	0.0001	0	0.1009	0.004	Otu004
Otu013	27131	Actinobacteria	Actinobacteria	Actinomycetales	Cellulomonadaceae	Cellulomonas	96.7742	1.52	0.0003	0	0.0228	0.0172	0.0455	0.0001	0.0012	0.0222	0.0019	0.0017	0.003	0.0002	0.0021	0.0013	0.0014	0.0012	0.0046	0.0008	0.0049	0.0012	0.0056	0.0111	0.0115	0.009	0.0045	0.0058	0.0006	0.2385	0.0214	0.0082	0.0214	Otu013
Otu012	21131	Actinobacteria	Actinobacteria	Actinomycetales	Micrococcaceae	Rothia	80.6452	1.46935	0	0.0046	0.0539	0.0105	0.005	0.0366	0.003	0.0121	0.0003	0.0194	0.0017	0	0.0049	0	0.0029	0.017	0.0916	0.0032	0.0001	0	0.053	0.0019	0	0.0016	0	0.0438	0.001	0.0601	0.0001	0.0142	0.013	Otu012
Otu010	17813	Proteobacteria	Gammaproteobacteria	Enterobacteriales	Enterobacteriaceae	unclassified	83.871	1.39032	0.0001	0.3394	0.0004	0.0003	0.0036	0.0001	0.0005	0.0027	0.0001	0.0002	0.002	0	0.0015	0.0001	0.0007	0.0004	0	0	0.0013	0.0003	0.0005	0.0003	0.0003	0	0.0002	0.0012	0.0572	0.0151	0.0022	0.0003	0	Otu010
Otu016	21067	Actinobacteria	Actinobacteria	Actinomycetales	Corynebacteriaceae	Corynebacterium	90.3226	1.28097	0.0047	0	0.0411	0.0046	0	0.0011	0.0029	0.0378	0.0029	0.0158	0.0009	0.0001	0.0041	0.0113	0.0127	0.0192	0.0329	0.0236	0.0394	0.0051	0.0005	0.0019	0.0175	0.0974	0.0025	0.0151	0.0002	0.0001	0.0015	0.0002	0	Otu016
Otu014	11969	Proteobacteria	Gammaproteobacteria	Xanthomonadales	Xanthomonadaceae	Stenotrophomonas	35.4839	0.937097	0	0.076	0.0001	0.0002	0	0.1744	0	0	0	0	0	0.0156	0.0004	0	0.0209	0	0	0	0	0	0	0	0.0001	0.0024	0	0	0	0	0	0.0001	0.0003	Otu014
Otu011	13039	Firmicutes	Negativicutes	Selenomonadales	Veillonellaceae	Veillonella	77.4194	0.846452	0.0036	0.0029	0.0001	0.0313	0.0009	0.0753	0.0001	0.0086	0.0021	0.0013	0	0	0.007	0.0014	0.0002	0.0123	0	0.0034	0	0.0016	0.0471	0.0073	0.0026	0.0047	0	0.0239	0.001	0	0	0.0047	0.019	Otu011
Otu037	11025	Proteobacteria	Alphaproteobacteria	Rhizobiales	Brucellaceae	unclassified	19.3548	0.734194	0	0.0915	0.0012	0	0	0	0	0	0.0002	0	0	0	0	0	0.1338	0	0	0	0.0003	0	0	0	0	0	0	0.0006	0	0	0	0	0	Otu037
Otu028	6758	Bacteroidetes	Flavobacteriia	Flavobacteriales	Flavobacteriaceae	Chryseobacterium	41.9355	0.515484	0	0.0527	0	0.0028	0	0.0093	0.0059	0	0	0.0001	0	0	0.0335	0	0	0	0	0.0002	0.0332	0	0.0013	0	0	0.0007	0	0.005	0.0147	0	0	0.0004	0	Otu028
Otu015	18636	Proteobacteria	Betaproteobacteria	Burkholderiales	Oxalobacteraceae	Massilia	83.871	0.476774	0	0	0.0061	0.0218	0.0213	0	0.0005	0.0119	0.0001	0.0004	0.0014	0	0.0006	0.0004	0.0001	0.0004	0.0031	0.0002	0.0002	0.0001	0.0007	0.0023	0.0031	0.0005	0.0004	0.0007	0	0.0631	0.0031	0.0006	0.0047	Otu015
Otu019	10218	Firmicutes	Bacilli	Lactobacillales	Lactobacillaceae	Lactobacillus	67.7419	0.426129	0.0004	0	0.004	0.0002	0.0047	0.0001	0	0.0037	0.0002	0.0104	0.011	0	0	0.0004	0	0.0026	0	0	0.0072	0.0016	0.0005	0.0009	0.0028	0.0444	0.0001	0.0263	0	0	0.0088	0.0018	0	Otu019
Otu025	5463	Proteobacteria	Gammaproteobacteria	Pseudomonadales	Moraxellaceae	Enhydrobacter	74.1935	0.333226	0.0003	0.0001	0	0.0053	0.011	0.0037	0.0044	0	0.0054	0.0002	0	0	0.0421	0.0001	0.0008	0.0001	0	0.0002	0.0022	0.0003	0.0008	0.0005	0.0005	0.0012	0.0007	0.0087	0.0146	0	0	0	0.0001	Otu025
Otu088	3102	Proteobacteria	Alphaproteobacteria	Rhizobiales	Rhizobiaceae	Rhizobium	32.2581	0.306452	0	0.0771	0	0	0	0.004	0	0	0.0001	0.0001	0	0.0001	0	0	0.012	0	0	0.0001	0	0	0.0007	0.0005	0	0	0	0	0.0003	0	0	0	0	Otu088
Otu036	3569	Actinobacteria	Actinobacteria	Bifidobacteriales	Bifidobacteriaceae	Bifidobacterium	35.4839	0.267097	0	0	0	0.0235	0	0.008	0	0	0.0005	0.0004	0.0019	0	0	0	0	0.0009	0	0	0.0002	0	0	0	0	0.0368	0.0041	0.0014	0	0	0	0	0.0051	Otu036
Otu031	4304	Firmicutes	Clostridia	Clostridiales	Clostridiales_Incertae_Sedis_XI	Anaerococcus	35.4839	0.249032	0.001	0	0	0	0	0	0	0.0059	0	0	0	0	0.0079	0	0	0.0007	0	0	0.0011	0.0001	0.0003	0.0039	0.0024	0.0472	0	0.0067	0	0	0	0	0	Otu031
Otu029	3467	Actinobacteria	Actinobacteria	Actinomycetales	Propionibacteriaceae	Propionibacterium	83.871	0.22871	0.0001	0.0001	0.0022	0.0041	0	0.0019	0.0004	0.0026	0	0.0051	0.0023	0	0.0164	0	0.0078	0.0009	0.0006	0.0007	0	0.0015	0.0008	0.0001	0.0009	0.0014	0.0007	0.0048	0.0001	0.0127	0.0002	0.0001	0.0024	Otu029
Otu083	990	Proteobacteria	Gammaproteobacteria	Enterobacteriales	Enterobacteriaceae	Enterobacter	12.9032	0.223548	0	0.0009	0	0	0	0	0	0	0	0	0.0046	0	0.0015	0	0	0	0	0	0	0	0	0	0	0	0	0	0	0.0623	0	0	0	Otu083
Otu005	2750	Proteobacteria	Gammaproteobacteria	Pseudomonadales	Pseudomonadaceae	unclassified	93.5484	0.213226	0.0003	0.0005	0.0145	0.0024	0.0097	0.001	0.0006	0.0062	0.0007	0.0002	0.0007	0	0.0004	0.0002	0	0.0001	0.0006	0.0001	0.0003	0.0001	0.0006	0.0009	0.0009	0.0016	0.0004	0.0014	0.0001	0.0162	0.0035	0.001	0.0009	Otu005
Otu022	26911	Actinobacteria	Actinobacteria	Actinomycetales	Microbacteriaceae	Leifsonia	70.9677	0.206452	0	0	0.0053	0.0034	0.0065	0	0	0.0093	0.0005	0	0	0	0.0001	0.0004	0	0.0001	0.0011	0	0.0014	0.0003	0.0005	0.0022	0.0007	0.0013	0.0001	0.0003	0.0001	0.0234	0.0047	0.0007	0.0016	Otu022
Otu044	4957	Firmicutes	Bacilli	Bacillales	Bacillaceae_1	unclassified	83.871	0.205484	0	0	0.0057	0.0001	0.0048	0	0.0002	0.0074	0.0004	0.0001	0.0011	0	0.0007	0.0001	0.0004	0.0001	0.0008	0	0.0002	0.0001	0.0007	0.0008	0.0016	0.0002	0.0006	0.0005	0.0001	0.0303	0.0032	0.0005	0.003	Otu044
Otu027	3671	Actinobacteria	Actinobacteria	Actinomycetales	Actinomycetaceae	Actinomyces	48.3871	0.16	0	0.0002	0	0	0	0	0.0003	0.0001	0.0002	0.0016	0	0	0.0015	0.0062	0	0.002	0	0.0003	0	0.0015	0	0	0	0.001	0	0.0215	0.0014	0	0.0002	0.0116	0	Otu027
Otu006	2718	Firmicutes	Bacilli	Bacillales	unclassified	unclassified	100	0.146452	0.0024	0.0009	0.0013	0.0009	0.0013	0.0001	0.0005	0.0026	0.0027	0.0028	0.0009	0.0012	0.0008	0.0035	0.0001	0.0001	0.0017	0.0013	0.002	0.0012	0.0005	0.0005	0.0021	0.0007	0.0038	0.0026	0.0001	0.0015	0.0028	0.0009	0.0016	Otu006
Otu041	1717	Proteobacteria	Alphaproteobacteria	Caulobacterales	Caulobacteraceae	Brevundimonas	22.5806	0.14	0	0.0112	0	0.0003	0	0.0252	0	0	0	0	0	0	0	0	0.0062	0	0	0	0	0.0001	0	0	0	0	0	0.0002	0.0002	0	0	0	0	Otu041
Otu007	2021	Firmicutes	Bacilli	Lactobacillales	Streptococcaceae	unclassified	83.871	0.120323	0.0026	0.0002	0.0045	0.0026	0.0009	0.0009	0.0053	0.0004	0.002	0.0008	0.0016	0	0.0013	0.0006	0	0.0018	0.0002	0.001	0.0003	0.0012	0.0025	0.0023	0.0002	0.0009	0	0.0017	0.0002	0	0	0.0006	0.0007	Otu007
Otu058	1425	Proteobacteria	Alphaproteobacteria	Sphingomonadales	Sphingomonadaceae	Sphingobium	12.9032	0.12	0	0	0	0.0009	0	0.0299	0	0	0	0	0	0	0	0	0	0	0	0	0	0	0	0	0	0	0	0.0028	0	0.0036	0	0	0	Otu058
Otu034	2065	Proteobacteria	Gammaproteobacteria	Pasteurellales	Pasteurellaceae	Haemophilus	38.7097	0.111935	0	0	0	0.0001	0	0	0	0.0044	0.0002	0	0	0	0.0003	0	0	0.0052	0.0007	0	0	0	0.002	0.0002	0.0003	0	0.0012	0.0014	0	0	0	0.0187	0	Otu034
Otu045	2327	Proteobacteria	Betaproteobacteria	Burkholderiales	Comamonadaceae	Comamonas	12.9032	0.109032	0	0	0	0	0	0.0091	0	0	0	0	0	0	0.0006	0	0	0	0	0	0	0	0	0	0	0	0	0	0.024	0.0001	0	0	0	Otu045
Otu043	2144	Proteobacteria	Betaproteobacteria	Neisseriales	Neisseriaceae	Neisseria	25.8065	0.100645	0	0	0	0	0	0	0	0	0.0001	0	0	0	0.0027	0	0	0.0055	0	0.0002	0	0	0.0002	0	0	0	0.0003	0.009	0	0	0	0.0132	0	Otu043
Otu052	922	Bacteroidetes	Sphingobacteriia	Sphingobacteriales	Sphingobacteriaceae	Sphingobacterium	22.5806	0.0951613	0	0.0233	0	0.0001	0	0.0053	0	0	0	0	0	0.0001	0.0005	0	0	0	0	0.0001	0	0	0	0	0	0	0	0.0001	0	0	0	0	0	Otu052
Otu023	2844	unclassified	unclassified	unclassified	unclassified	unclassified	90.3226	0.0880645	0.0004	0.0007	0	0.0028	0.0087	0.0005	0.0011	0.0001	0.0003	0.0004	0.0003	0.0006	0.0017	0.0009	0.0008	0.0001	0.0002	0.0006	0.0002	0	0.0003	0.0001	0.0001	0	0.0003	0.0011	0.0005	0.0004	0.0023	0.0002	0.0016	Otu023
Otu009	1187	Firmicutes	Bacilli	Lactobacillales	unclassified	unclassified	87.0968	0.0777419	0.0003	0.0001	0.0041	0.0011	0	0.0007	0.0014	0.001	0.0008	0.0007	0.003	0	0.0011	0.0014	0	0.0008	0.0001	0.0006	0.0001	0.0004	0.0008	0.0002	0.0005	0.0017	0	0.0012	0.0001	0.0001	0.0001	0.0004	0.0013	Otu009
Otu033	1631	Firmicutes	Bacilli	Lactobacillales	Carnobacteriaceae	Granulicatella	29.0323	0.0732258	0	0	0	0.0003	0	0	0	0	0	0.0002	0	0	0.0007	0	0	0.0059	0.0002	0	0.0002	0	0.0001	0	0	0	0	0.0148	0.0003	0	0	0	0	Otu033
Otu073	920	Proteobacteria	Alphaproteobacteria	Rhizobiales	Methylobacteriaceae	Methylobacterium	19.3548	0.0641935	0	0	0.0009	0	0.0041	0	0.0001	0.0146	0	0	0	0	0	0	0	0	0	0	0	0.0001	0	0.0001	0	0	0	0	0	0	0	0	0	Otu073
Otu047	1217	Proteobacteria	Gammaproteobacteria	Aeromonadales	Aeromonadaceae	Aeromonas	22.5806	0.0612903	0	0	0	0	0	0.0081	0	0	0.0008	0.0001	0	0	0.0018	0	0	0	0	0.0001	0.0008	0	0	0	0	0	0	0	0.0073	0	0	0	0	Otu047
Otu066	395	Firmicutes	Bacilli	Lactobacillales	Streptococcaceae	Lactococcus	9.67742	0.0612903	0	0	0.0004	0.0184	0	0	0	0	0	0	0	0	0	0	0	0	0	0	0	0	0.0002	0	0	0	0	0	0	0	0	0	0	Otu066
Otu051	1362	Proteobacteria	Betaproteobacteria	Burkholderiales	Oxalobacteraceae	Herbaspirillum	61.2903	0.0587097	0	0	0	0	0.0017	0	0.0002	0.0017	0.0003	0	0.0006	0	0.0003	0.0002	0	0	0	0	0.0001	0.0001	0.0002	0.0008	0.0005	0.0008	0.0001	0.0006	0	0.0057	0.0015	0.0009	0.0019	Otu051
Otu053	2035	Proteobacteria	Alphaproteobacteria	Rhodospirillales	Reyranella	unclassified	67.7419	0.0583871	0	0	0.0007	0.0012	0.0033	0	0.0001	0.0041	0.0002	0	0	0	0.0002	0.0002	0.0004	0.0002	0	0	0.0004	0.0002	0.0002	0.0011	0.0002	0.0007	0.0004	0.0005	0.0001	0	0.0032	0	0.0005	Otu053
Otu074	1468	Proteobacteria	Alphaproteobacteria	Rhodobacterales	Rhodobacteraceae	Paracoccus	48.3871	0.0551613	0	0	0	0.0001	0	0.0001	0.0009	0.0053	0.0001	0.0001	0	0	0.0008	0	0	0	0.0004	0	0.0021	0	0	0	0.0001	0.0002	0.0002	0.0006	0.0045	0	0	0	0.0016	Otu074
Otu064	865	Actinobacteria	Actinobacteria	Actinomycetales	Micrococcaceae	Micrococcus	45.1613	0.0541935	0	0	0	0.0014	0	0	0.0002	0.0011	0.0007	0	0	0	0.0007	0	0.0012	0	0.0042	0	0	0	0	0.0019	0	0.0006	0.0022	0.002	0.0002	0.0001	0	0.0003	0	Otu064
Otu054	938	Firmicutes	Clostridia	Clostridiales	Peptoniphilaceae	Peptoniphilus	32.2581	0.0474194	0	0	0	0.0004	0	0	0.0007	0	0	0	0	0.0001	0.0044	0	0.0008	0.0007	0	0	0.0005	0	0.0001	0.002	0	0	0	0.005	0	0	0	0	0	Otu054
Otu075	1035	Firmicutes	Clostridia	Clostridiales	Clostridiales_Incertae_Sedis_XI	Finegoldia	25.8065	0.0467742	0	0	0	0	0	0	0.0008	0	0	0	0	0	0.0017	0.0001	0	0.0002	0	0	0	0	0.0001	0.0025	0.0025	0	0	0.0066	0	0	0	0	0	Otu075
Otu017	690	Firmicutes	Bacilli	unclassified	unclassified	unclassified	90.3226	0.0416129	0.0012	0.0002	0.0003	0.0002	0.0007	0.0003	0.0002	0.0003	0.0015	0.0006	0.0002	0.0004	0.0004	0.0014	0	0.0001	0.0004	0.0003	0.0004	0.0005	0.0003	0.0002	0.0001	0.0003	0.0007	0.0008	0	0.0001	0.0005	0	0.0003	Otu017
Otu048	898	Candidatus_Saccharibacteria	unclassified	unclassified	unclassified	unclassified	25.8065	0.0387097	0	0	0	0	0	0	0	0.001	0	0	0.0003	0	0.0014	0	0.0001	0.0038	0.0001	0	0	0	0	0	0	0.0004	0	0.0049	0	0	0	0	0	Otu048
Otu085	976	Firmicutes	Bacilli	Bacillales	Bacillaceae_1	Bacillus	48.3871	0.0364516	0	0	0.0004	0.0003	0	0	0	0	0	0.0002	0.0006	0	0.0003	0.0001	0	0.0003	0	0	0.0007	0.0001	0.0005	0	0.0005	0	0	0	0	0.0062	0.0001	0.0002	0.0008	Otu085
Otu055	758	Proteobacteria	Gammaproteobacteria	Enterobacteriales	Enterobacteriaceae	Escherichia/Shigella	25.8065	0.0364516	0	0	0	0	0	0	0	0	0	0.0006	0	0.0063	0.0023	0.0004	0.0001	0	0	0	0	0.0002	0	0.0009	0	0	0	0.0005	0	0	0	0	0	Otu055
Otu039	488	Proteobacteria	Betaproteobacteria	Neisseriales	Neisseriaceae	unclassified	19.3548	0.0354839	0	0	0	0.0012	0	0	0	0	0	0	0	0	0.0069	0	0	0.0006	0	0	0.0018	0	0	0	0	0	0	0.0003	0	0	0	0.0002	0	Otu039
Otu020	685	Actinobacteria	Actinobacteria	Actinomycetales	unclassified	unclassified	74.1935	0.0332258	0	0	0.0014	0.0001	0.0009	0.0001	0.0002	0.0008	0.0001	0.0006	0.0001	0	0.0002	0	0.0001	0	0.0001	0.0001	0.0002	0	0.0003	0.0004	0.0002	0.0005	0	0.0015	0	0.0019	0.0001	0.0003	0.0001	Otu020
Otu084	414	Bacteroidetes	Flavobacteriia	Flavobacteriales	Flavobacteriaceae	Chishuiella	9.67742	0.0329032	0	0	0	0	0.0001	0.01	0	0.0001	0	0	0	0	0	0	0	0	0	0	0	0	0	0	0	0	0	0	0	0	0	0	0	Otu084
Otu018	629	Proteobacteria	Gammaproteobacteria	Pseudomonadales	Moraxellaceae	unclassified	25.8065	0.0316129	0	0.0011	0	0	0	0.0006	0	0	0	0	0	0.0024	0	0.0001	0.0032	0	0	0	0	0	0	0	0	0	0	0.0001	0.0022	0.0001	0	0	0	Otu018
Otu060	637	Proteobacteria	Betaproteobacteria	Burkholderiales	Comamonadaceae	Delftia	22.5806	0.0309677	0	0.0064	0.0005	0.0001	0	0	0	0	0	0	0	0	0	0.0002	0	0	0	0	0	0	0	0	0	0	0	0.0007	0.0001	0	0.0016	0	0	Otu060
Otu049	842	Bacteroidetes	Bacteroidia	Bacteroidales	Prevotellaceae	Prevotella	22.5806	0.03	0	0.0007	0	0	0	0	0	0	0	0.0001	0	0	0.0014	0	0	0.0004	0	0	0	0	0	0.0015	0	0	0	0.0042	0	0	0	0.001	0	Otu049
Otu079	488	Firmicutes	Clostridia	Clostridiales	Ruminococcaceae	Faecalibacterium	16.129	0.0241935	0	0	0	0	0	0	0	0.0059	0	0	0	0	0	0	0	0.0001	0.0004	0	0	0	0	0	0	0	0	0.0005	0	0	0	0	0.0006	Otu079
Otu035	1772	Proteobacteria	Betaproteobacteria	Burkholderiales	Burkholderiaceae	Ralstonia	41.9355	0.0232258	0	0	0	0	0	0	0.0003	0	0	0	0.0003	0	0	0.0001	0	0	0	0	0.0004	0	0.0005	0	0.0002	0.0011	0.0004	0.0004	0.0001	0	0.0012	0.0007	0.0015	Otu035
Otu030	253	Proteobacteria	Alphaproteobacteria	Rhizobiales	Brucellaceae	Brucella	9.67742	0.0219355	0	0.0041	0	0	0	0	0	0	0	0	0	0	0	0	0.0026	0	0	0	0	0	0	0	0	0	0	0.0001	0	0	0	0	0	Otu030
Otu070	876	Bacteroidetes	Bacteroidia	Bacteroidales	Bacteroidaceae	Bacteroides	16.129	0.0219355	0	0	0	0	0	0	0	0	0	0	0	0	0	0	0	0	0	0	0.0009	0	0	0	0.0005	0.0023	0	0.0008	0	0	0	0	0.0023	Otu070
Otu080	285	Actinobacteria	Actinobacteria	Bifidobacteriales	Bifidobacteriaceae	Scardovia	9.67742	0.0203226	0	0	0	0	0	0.0045	0	0	0	0	0	0	0.0008	0	0	0	0	0	0	0	0	0	0	0	0	0	0	0	0	0.001	0	Otu080
Otu081	220	Firmicutes	Bacilli	Lactobacillales	Carnobacteriaceae	Dolosigranulum	16.129	0.02	0	0	0.0039	0.0006	0	0	0	0	0.0007	0	0.0002	0	0	0	0	0	0	0	0	0	0	0	0	0.0008	0	0	0	0	0	0	0	Otu081
Otu094	216	Firmicutes	Clostridia	Clostridiales	Lachnospiraceae	unclassified	16.129	0.0196774	0	0	0.0021	0	0	0	0	0	0	0	0	0	0	0	0.0001	0	0	0	0.0006	0	0	0	0	0	0	0.0003	0	0	0	0	0.003	Otu094
Otu026	334	Firmicutes	Bacilli	Bacillales	Staphylococcaceae	unclassified	77.4194	0.0187097	0.0002	0.0001	0.0002	0	0.0001	0	0.0001	0.0003	0.0003	0.0004	0.0002	0.0002	0.0001	0.0002	0.0001	0	0.0002	0.0002	0.0001	0.0002	0.0001	0	0.0005	0	0.0007	0.0005	0	0	0.0001	0.0002	0.0005	Otu026
Otu098	247	Firmicutes	Clostridia	Clostridiales	Lachnospiraceae	Ruminococcus2	9.67742	0.0183871	0	0	0.004	0	0	0	0	0	0	0	0	0	0	0	0	0	0	0	0	0	0	0	0.0008	0	0	0.0009	0	0	0	0	0	Otu098
Otu076	438	Proteobacteria	Betaproteobacteria	Burkholderiales	Burkholderiaceae	Lautropia	6.45161	0.0167742	0	0	0	0	0	0	0	0	0	0	0	0	0.0002	0	0	0	0	0	0	0	0	0	0	0	0	0.005	0	0	0	0	0	Otu076
Otu118	260	Actinobacteria	Actinobacteria	Actinomycetales	Micrococcaceae	Kocuria	19.3548	0.0154839	0.0002	0	0	0.0006	0	0	0	0.0032	0	0	0	0	0.0001	0	0	0	0	0	0	0	0	0	0	0	0.0001	0	0	0	0	0.0006	0	Otu118
Otu021	538	Proteobacteria	Betaproteobacteria	Burkholderiales	Oxalobacteraceae	unclassified	38.7097	0.0151613	0	0	0.0003	0.0008	0.0008	0	0	0.0007	0	0	0.0002	0	0	0	0	0	0.0001	0	0.0001	0	0	0.0001	0.0001	0.0001	0	0	0.0001	0.0013	0	0	0	Otu021
Otu068	279	Firmicutes	Negativicutes	Selenomonadales	Veillonellaceae	Dialister	12.9032	0.0151613	0	0	0	0	0	0	0	0	0	0	0	0	0.002	0.0001	0	0	0	0	0	0	0	0.0008	0	0	0	0.0018	0	0	0	0	0	Otu068
Otu096	184	Proteobacteria	Gammaproteobacteria	Vibrionales	Vibrionaceae	Photobacterium	6.45161	0.0145161	0	0	0	0	0	0	0	0	0	0.0033	0	0	0	0	0	0	0	0	0	0	0	0	0	0	0	0.0012	0	0	0	0	0	Otu096
Otu046	315	Bacteroidetes	Flavobacteriia	Flavobacteriales	Flavobacteriaceae	unclassified	38.7097	0.0129032	0	0.0004	0	0.0009	0	0.0001	0	0	0	0.0003	0	0	0.0005	0	0	0.0002	0	0	0.0002	0.0008	0	0.0001	0	0.0001	0	0	0.0003	0	0	0.0001	0	Otu046
Otu105	214	Actinobacteria	Actinobacteria	Coriobacteriales	Coriobacteriaceae	Atopobium	19.3548	0.0122581	0	0.0003	0	0	0	0	0	0.0005	0.0003	0	0	0	0	0	0	0	0	0	0	0	0	0.0014	0.0001	0	0	0.0012	0	0	0	0	0	Otu105
Otu077	327	Proteobacteria	Gammaproteobacteria	Oceanospirillales	Alcanivoracaceae	Alcanivorax	12.9032	0.0119355	0	0	0	0	0	0	0	0.0016	0	0	0	0	0	0	0	0	0	0	0	0	0	0	0	0	0	0.0001	0	0	0.0006	0	0.0014	Otu077
Otu140	220	Firmicutes	Bacilli	Lactobacillales	Aerococcaceae	Abiotrophia	22.5806	0.0119355	0	0	0	0.0007	0	0	0.0004	0	0	0	0	0	0.0001	0	0.0002	0.0011	0.0001	0	0	0	0	0	0	0	0	0.0011	0	0	0	0	0	Otu140
Otu087	377	Bacteroidetes	Flavobacteriia	Flavobacteriales	Flavobacteriaceae	Flavobacterium	9.67742	0.0103226	0	0.003	0	0	0	0.0001	0	0	0	0	0	0	0	0	0	0	0	0	0	0	0	0	0	0	0	0	0.0001	0	0	0	0	Otu087
Otu100	506	Proteobacteria	Alphaproteobacteria	Sphingomonadales	Sphingomonadaceae	Sphingomonas	19.3548	0.01	0	0	0	0	0	0.0001	0	0.0019	0	0	0.0001	0	0	0	0	0	0.0002	0	0	0	0	0	0	0	0	0.0001	0	0	0	0.0007	0	Otu100
Otu032	184	Proteobacteria	Gammaproteobacteria	unclassified	unclassified	unclassified	29.0323	0.00967742	0	0.0018	0	0.0001	0	0.0002	0	0	0	0	0	0.0001	0	0	0.0001	0	0.0001	0	0	0	0	0	0	0	0.0001	0	0.0002	0	0	0.0003	0	Otu032
Otu069	736	Firmicutes	Bacilli	Lactobacillales	Enterococcaceae	Enterococcus	6.45161	0.00903226	0	0	0	0	0	0	0	0	0	0	0	0	0	0	0	0	0	0	0	0	0	0.001	0	0	0	0.0018	0	0	0	0	0	Otu069
Otu024	396	Actinobacteria	Actinobacteria	Actinomycetales	Microbacteriaceae	unclassified	25.8065	0.00645161	0.0001	0	0.0002	0	0.0002	0	0	0.0001	0	0	0	0	0	0	0	0	0	0	0	0	0	0	0.0006	0	0	0.0002	0	0.0005	0.0001	0	0	Otu024
Otu078	613	Bacteroidetes	Flavobacteriia	Flavobacteriales	Flavobacteriaceae	Cloacibacterium	9.67742	0.00451613	0	0	0.0009	0	0	0	0	0	0	0	0	0	0	0	0	0	0.0003	0	0	0	0	0	0	0	0	0	0	0	0.0002	0	0	Otu078
Otu092	602	Proteobacteria	Alphaproteobacteria	Sphingomonadales	Erythrobacteraceae	unclassified	19.3548	0.00451613	0	0	0	0	0	0	0.0001	0	0	0	0.0001	0	0	0	0	0.0003	0	0	0.0003	0	0.0005	0	0	0	0	0	0	0.0001	0	0	0	Otu092
Otu114	253	Actinobacteria	Actinobacteria	Actinomycetales	Microbacteriaceae	Microbacterium	12.9032	0.00419355	0	0	0	0	0	0	0.0002	0	0	0	0	0	0.0001	0	0	0	0	0	0	0	0	0	0	0	0	0.0007	0	0	0.0003	0	0	Otu114
Otu185	324	Proteobacteria	Alphaproteobacteria	Rhizobiales	Phyllobacteriaceae	Mesorhizobium	9.67742	0.0016129	0	0	0	0	0	0	0	0	0	0.0001	0	0	0.0001	0	0	0	0	0	0.0003	0	0	0	0	0	0	0	0	0	0	0	0	Otu185
Otu147	186	Proteobacteria	Betaproteobacteria	Burkholderiales	Burkholderiales_incertae_sedis	Aquabacterium	6.45161	0.000967742	0	0	0	0	0	0	0	0	0	0	0.0001	0	0	0	0	0	0	0	0	0	0.0002	0	0	0	0	0	0	0	0	0	0	Otu147
Otu194	383	Firmicutes	Clostridia	Clostridiales	Clostridiaceae_1	Clostridium_sensu_stricto	3.22581	0.000645161	0	0	0	0	0	0	0	0	0	0	0	0	0	0	0	0	0.0002	0	0	0	0	0	0	0	0	0	0	0	0	0	0	Otu194

## Sheet: Table S5
Table S5: Abundance of bacteria in milk samples, determined with cultivation and MALDI-TOF identification of selected colonies grown on BHI, TSA, WCA-M and Rogosa.
Table represents number of genera detected in each sample.
Sample	NRID	Acinetobacter	Actinomyces	Bacillus	Bifidobacterium	Brevibacterium	Corynebacterium	Dermabacter	Enterobacter	Escherichia	Finegoldia	Gemella	Klebsiella	Kocuria	Lactobacillus	Micrococcus	Moraxella	Mycoplasma	Ochrobactrum	Propionibacterium	Pseudomonas	Rhizobium	Rothia	Staphylococcus	Stenotrophomonas	Streptococcus	Veillonella
s01	1	0	0	0	0	0	1	0	0	0	0	0	0	2	1	0	0	5	0	2	0	0	0	26	0	2	0
s02	1	1	0	0	0	0	0	0	3	0	0	0	10	0	0	0	0	0	7	2	0	3	1	4	0	3	0
s03	12	0	0	0	0	0	0	0	0	0	0	0	0	1	0	1	1	0	0	0	0	0	2	9	0	9	0
s05	2	1	0	0	1	0	0	0	0	0	0	0	0	0	0	0	0	0	0	14	0	0	2	13	1	2	0
s08	1	2	0	0	0	0	0	0	0	0	0	0	0	0	0	0	0	0	0	2	0	0	0	26	0	0	0
s09	7	0	0	0	3	0	2	0	0	0	0	0	0	0	1	0	0	0	0	11	1	0	2	13	0	4	0
s10	0	0	0	0	0	0	1	0	0	0	0	0	0	0	0	0	0	5	0	5	0	0	0	10	0	18	0
s11	5	0	0	0	3	0	5	0	0	0	0	0	0	0	0	0	0	1	0	2	0	0	0	16	0	4	0
s12	2	0	0	0	0	0	1	0	0	0	0	0	0	0	0	0	0	0	0	1	0	0	0	23	0	5	0
s13	1	0	0	0	0	0	3	0	0	0	0	0	0	0	2	0	0	3	0	3	0	0	3	23	0	2	0
s14	0	0	0	0	0	0	0	0	0	0	0	0	0	1	0	0	0	3	0	5	0	0	1	22	0	8	0
s15	3	4	0	1	0	0	1	0	0	1	0	0	0	0	0	0	0	1	0	1	0	0	0	18	4	0	0
s16	2	0	0	0	0	0	0	0	0	1	1	0	0	0	0	0	0	0	0	14	0	0	0	18	0	0	0
s17	0	0	4	0	0	0	2	0	0	0	0	1	0	0	0	0	0	0	0	1	0	0	0	27	0	1	0
s18	0	0	0	0	0	0	4	0	0	0	0	0	0	0	0	0	0	1	7	12	0	1	0	11	0	0	0
s19	4	0	3	0	0	0	2	0	0	0	0	0	0	1	0	0	0	0	0	4	0	0	0	11	0	10	0
s20	4	0	0	0	0	0	1	0	0	0	0	0	0	0	0	0	0	2	0	0	0	0	0	28	0	0	0
s21	1	0	0	0	0	0	3	0	0	0	0	0	0	0	0	0	0	2	0	2	0	0	0	19	0	10	0
s22	1	0	0	0	0	0	7	0	0	0	0	0	0	0	0	0	0	2	0	1	0	0	0	25	0	0	0
s23	2	0	0	0	0	0	3	0	0	0	0	0	0	1	0	0	0	1	0	5	0	0	0	16	0	8	0
s24	3	0	0	0	0	0	0	0	0	0	0	1	0	0	0	0	0	2	0	1	0	0	0	11	0	12	1
s25	2	0	0	0	0	1	0	0	0	0	2	1	1	1	1	1	1	1	0	0	0	0	1	27	0	2	0
s26	2	0	0	0	0	0	0	0	0	0	0	0	0	0	0	0	0	2	0	5	0	0	0	17	0	5	0
s27	4	0	0	0	1	0	0	1	0	0	0	0	0	0	3	0	0	3	0	0	0	0	0	15	0	6	0
s28	0	0	0	0	0	0	0	0	0	0	0	0	0	0	0	0	0	2	0	5	0	0	0	27	0	0	0
s29	4	1	2	0	0	1	2	0	0	0	0	0	0	0	0	0	0	1	0	6	0	0	0	17	0	3	0
s30	4	0	0	0	0	0	1	0	0	0	0	0	0	0	0	0	0	2	0	0	0	0	3	12	0	13	0
s31	1	0	0	0	0	0	0	0	0	0	0	0	0	0	0	0	0	0	0	2	0	0	0	9	0	0	0
s32	1	0	0	0	0	0	1	0	0	0	0	0	0	0	0	0	0	0	0	1	0	0	0	26	0	1	0
s33	5	0	5	0	0	0	0	0	0	0	0	0	0	0	0	0	0	2	0	2	0	0	0	20	0	6	0
s34	1	0	0	0	0	0	0	0	0	0	0	0	0	0	0	0	0	1	0	4	0	0	1	18	0	7	0
Table represent number of colonies assigned to specific genera, determined by MALDI-TOF
NRID:	No reliable identification

## Sheet: Table S6
Table S6: Pearson correlation coefficients between the Shannon diversity index and the abundance of specific OTU determined by 16S rRNA gene NGS
OTU	Pearson	p-Value	Rank	corrected p-Value
Otu000001	-0.555772	0.00117041	1	0.000423729
Otu000014	0.509256	0.00343399	2	0.000847458
Otu000049	0.417348	0.0194944	3	0.00127119
Otu000053	0.413834	0.020652	4	0.00169492
Otu000017	0.396316	0.0273011	5	0.00211864
Otu000030	0.395983	0.0274423	6	0.00254237
Otu000088	0.390609	0.0298113	7	0.0029661
Otu000102	0.390084	0.0300513	8	0.00338983
Otu000108	0.380579	0.0346769	9	0.00381356
Otu000042	0.37792	0.0360688	10	0.00423729
Otu000045	0.376574	0.0367909	11	0.00466102
Otu000065	0.372063	0.0392947	12	0.00508475
Otu000097	0.372039	0.0393083	13	0.00550847
Otu000077	0.365959	0.0428996	14	0.0059322
Otu000078	0.363614	0.0443529	15	0.00635593
Otu000099	0.363614	0.0443529	16	0.00677966
Otu000080	0.357862	0.048084	17	0.00720339
Otu000076	0.357692	0.0481984	18	0.00762712
Otu000044	0.353974	0.0507446	19	0.00805085
Otu000040	0.353432	0.0511247	20	0.00847458
Otu000086	0.353337	0.0511918	21	0.00889831
Otu000035	0.353106	0.0513547	22	0.00932203
Otu000101	0.353106	0.0513547	23	0.00974576
Otu000039	0.352156	0.0520288	24	0.0101695
Otu000104	0.3515	0.052498	25	0.0105932
Otu000026	0.342959	0.0589208	26	0.0110169
Otu000059	0.331558	0.0684392	27	0.0114407
Otu000075	0.311322	0.0882323	28	0.0118644
Otu000105	0.308336	0.0914888	29	0.0122881
Otu000048	0.306707	0.0933043	30	0.0127119
Otu000067	0.285879	0.118987	31	0.0131356
Otu000062	0.282881	0.123079	32	0.0135593
Otu000082	0.282059	0.124219	33	0.0139831
Otu000022	0.281898	0.124443	34	0.0144068
Otu000050	0.279601	0.127672	35	0.0148305
Otu000071	0.277736	0.13034	36	0.0152542
Otu000083	0.276572	0.132026	37	0.015678
Otu000121	0.268538	0.144099	38	0.0161017
Otu000070	0.266476	0.147322	39	0.0165254
Otu000120	0.264548	0.150383	40	0.0169492
Otu000100	0.264383	0.150647	41	0.0173729
Otu000087	0.263849	0.151505	42	0.0177966
Otu000011	0.258508	0.16027	43	0.0182203
Otu000036	0.250766	0.173613	44	0.0186441
Otu000092	0.250139	0.174727	45	0.0190678
Otu000027	0.249926	0.175105	46	0.0194915
Otu000041	0.242636	0.188449	47	0.0199153
Otu000012	0.238949	0.195463	48	0.020339
Otu000003	0.234373	0.204416	49	0.0207627
Otu000114	0.230276	0.212666	50	0.0211864
Otu000107	0.229772	0.213697	51	0.0216102
Otu000016	0.22719	0.219031	52	0.0220339
Otu000028	0.226119	0.22127	53	0.0224576
Otu000055	0.223308	0.22722	54	0.0228814
Otu000118	0.223153	0.227549	55	0.0233051
Otu000005	-0.222307	0.229363	56	0.0237288
Otu000085	0.221832	0.230386	57	0.0241525
Otu000074	0.220866	0.232475	58	0.0245763
Otu000068	0.220386	0.233517	59	0.025
Otu000122	0.218202	0.2383	60	0.0254237
Otu000010	0.215118	0.245164	61	0.0258475
Otu000066	0.212079	0.252055	62	0.0262712
Otu000089	0.208151	0.261152	63	0.0266949
Otu000115	0.206833	0.264251	64	0.0271186
Otu000060	0.2056	0.267173	65	0.0275424
Otu000047	0.200648	0.279116	66	0.0279661
Otu000117	0.200128	0.28039	67	0.0283898
Otu000072	0.196521	0.289328	68	0.0288136
Otu000009	0.196517	0.28934	69	0.0292373
Otu000079	0.196075	0.290446	70	0.029661
Otu000052	0.193775	0.296255	71	0.0300847
Otu000061	0.193177	0.297778	72	0.0305085
Otu000033	0.191084	0.303142	73	0.0309322
Otu000113	0.188448	0.309987	74	0.0313559
Otu000063	0.184744	0.319767	75	0.0317797
Otu000006	0.184114	0.321447	76	0.0322034
Otu000015	0.178727	0.336053	77	0.0326271
Otu000018	0.176614	0.341891	78	0.0330508
Otu000106	-0.171067	0.357505	79	0.0334746
Otu000007	0.166283	0.37131	80	0.0338983
Otu000058	-0.163946	0.378163	81	0.034322
Otu000013	-0.163878	0.378362	82	0.0347458
Otu000004	0.163517	0.379429	83	0.0351695
Otu000038	0.163476	0.37955	84	0.0355932
Otu000021	0.156799	0.39958	85	0.0360169
Otu000098	-0.153581	0.409443	86	0.0364407
Otu000046	0.149201	0.423087	87	0.0368644
Otu000025	-0.148621	0.424912	88	0.0372881
Otu000051	0.148062	0.426676	89	0.0377119
Otu000008	0.147925	0.427107	90	0.0381356
Otu000110	0.14492	0.436663	91	0.0385593
Otu000081	-0.141121	0.448907	92	0.0389831
Otu000111	0.140007	0.452529	93	0.0394068
Otu000056	0.138722	0.45673	94	0.0398305
Otu000119	-0.13494	0.469215	95	0.0402542
Otu000073	0.132974	0.475772	96	0.040678
Otu000043	0.123681	0.507406	97	0.0411017
Otu000019	0.118786	0.52448	98	0.0415254
Otu000090	-0.115693	0.535409	99	0.0419492
Otu000112	0.112167	0.548003	100	0.0423729
Otu000091	-0.106836	0.567299	101	0.0427966
Otu000029	0.10555	0.572	102	0.0432203
Otu000031	0.105524	0.572093	103	0.0436441
Otu000037	0.101145	0.588232	104	0.0440678
Otu000123	-0.0891036	0.633596	105	0.0444915
Otu000024	0.0863545	0.644148	106	0.0449153
Otu000032	0.0842919	0.652108	107	0.045339
Otu000020	0.0758864	0.684933	108	0.0457627
Otu000034	-0.073336	0.695009	109	0.0461864
Otu000093	0.0656714	0.725591	110	0.0466102
Otu000023	0.0579473	0.756836	111	0.0470339
Otu000002	-0.057923	0.756934	112	0.0474576
Otu000057	0.038748	0.836048	113	0.0478814
Otu000064	0.0308607	0.869099	114	0.0483051
Otu000124	-0.0219463	0.906714	115	0.0487288
Otu000069	-0.010598	0.954877	116	0.0491525
Otu000094	-0.00481198	0.979504	117	0.0495763
Otu000054	0.00275546	0.988263	118	0.05
*For statystical significance, p-Value must be lower than corrected p-Value (Benjamin-Hochberg correction)

## Sheet: Table S7
Table S7: Pearson correlation coefficients between the Shannon diversity index and the abundance of specific genus determined by cultivation and MALDI-TOF identification.
Genus	Pearson	p-Value	Rank	Corrected p-Value
Staphylococcus	-0.629245	0.00014942	1	0.00185185	*
unclassified	0.397687	0.0267244	2	0.0037037
Rothia	0.369318	0.0408844	3	0.00555556
Streptococcus	0.369224	0.04094	4	0.00740741
Rhizobium	0.368056	0.0416323	5	0.00925926
Klebsiella	0.363338	0.0445262	6	0.0111111
Enterobacter	0.353256	0.051249	7	0.012963
Bifidobacterium	0.350596	0.0531501	8	0.0148148
Ochrobactrum	0.320535	0.0787393	9	0.0166667
Pseudomonas	0.268659	0.143911	10	0.0185185
Lactobacillus	0.247081	0.180232	11	0.0203704
Brevibacterium	0.218222	0.238256	12	0.0222222
Propionibacterium	0.190787	0.30391	13	0.0240741
Kocuria	0.176353	0.342616	14	0.0259259
Micrococcus	0.15857	0.394211	15	0.0277778
Moraxella	0.15857	0.394211	16	0.0296296
Stenotrophomonas	0.15532	0.404096	17	0.0314815
Bacillus	0.132658	0.47683	18	0.0333333
Dermabacter	0.132162	0.478493	19	0.0351852
Acinetobacter	0.112845	0.545571	20	0.037037
Corynebacterium	0.0889829	0.634058	21	0.0388889
Actinomyces	0.0845967	0.650929	22	0.0407407
Veillonella	0.0827584	0.658052	23	0.0425926
Finegoldia	0.0471752	0.801036	24	0.0444444
Mycoplasma	0.0338055	0.856731	25	0.0462963
Escherichia	0.0165257	0.929689	26	0.0481481
Gemella	0.00300896	0.987183	27	0.05
*For statystical significance, p-Value must be lower than corrected p-Value (Benjamin-Hochberg correction)

## Sheet: Table S8
Table S8: Comparison between genus determinations with MALDI-TOF or with 16S Sanger sequencing.
Isolate name	Source sample number	MALDI-TOF identification	16S sequencing identification (SILVA)	Best BLAST hit (top score)
15T5	15	Acinetobacter pittii	Acinetobacter	Acinetobacter pittii/calcoaceticus
17D3	17	Actinomyces neuii	Actinomyces	Actinomyces neuii
M27K4	27	Bifidobacterium bifidum	Bifidobacterium	Bifidobacterium bifidum
M5W2	5	Bifidobacterium breve	Bifidobacterium	Bifidobacterium breve
M11K7	11	Bifidobacterium breve	Bifidobacterium	Bifidobacterium breve
21T2	21	Corynebacterium spp (kroppenstedtii)	Corynebacterium	Corynebacterium kroppenstedtii
21K15	21	Corynebacterium tuberculostearicum	Corynebacterium	Corynebacterium tuberculostearicum
17E3	17	Corynebacterium tuberculostearicum	Corynebacterium	Corynebacterium tuberculostearicum
2K15	2	Enterobacter cloacae	Enterobacter	Enterobacter asburiae
1K7	1	Gemella haemolysans	Gemella	Gemella taiwanensis/haemolysans
2K2	2	Klebsiella oxytoca	Klebsiella	Klebsiella oxytoca
1T12	1	Kocuria kristinae	Kocuria	Kocuria kristinae
M27R1	27	Lactobacillus gasseri	Lactobacillus	Lactobacillus gasseri
M13R1	13	Lactobacillus gasseri	Lactobacillus	Lactobacillus gasseri
M1R1	1	Lactobacillus rhamnosus	Lactobacillus	Lactobacillus rhamnosus
M9R1	9	Lactobacillus rhamnosus	Lactobacillus	Lactobacillus rhamnosus
2T8	2	Ochrobactrum anthropi	Ochrobactrum	Ochrobactrum anthropi/cytisi/lupini/tritici
18F1	18	Ochrobactrum anthropi	Ochrobactrum	Ochrobactrum anthropi/cytisi/lupini
16A1	16	Propionibacterium acnes*	Cutibacterium	Cutibacterium acnes
18G1	18	Propionibacterium acnes*	Cutibacterium	Cutibacterium acnes
15W1	15	Propionibacterium acnes*	Cutibacterium	Cutibacterium acnes
23K12	23	Propionibacterium acnes*	Cutibacterium	Cutibacterium acnes
1K6	1	Propionibacterium acnes*	Cutibacterium	Cutibacterium acnes
19I1	19	Propionibacterium acnes*	Cutibacterium	Cutibacterium acnes
13K7	13	Propionibacterium acnes*	Cutibacterium	Cutibacterium acnes
16C1	16	Propionibacterium spp. (acnes)	Cutibacterium	Cutibacterium acnes
2K5	2	Rothia amarae	Rothia	Rothia endophytica
13T7	13	Rothia mucilaginosa	Rothia	Rothia mucilaginosa
22T1	22	Staphylococcus aureus	Staphylococcus	Staphylococcus aureus
15T10	15	Staphylococcus epidermidis	Staphylococcus	Staphylococcus epidermidis
17D1	17	Staphylococcus epidermidis	Staphylococcus	Staphylococcus epidermidis
17E1	17	Staphylococcus epidermidis	Staphylococcus	Staphylococcus epidermidis
22K1	22	Staphylococcus epidermidis	Staphylococcus	Staphylococcus epidermidis
13T5	13	Staphylococcus epidermidis	Staphylococcus	Staphylococcus epidermidis
1T2	1	Staphylococcus epidermidis	Staphylococcus	Staphylococcus epidermidis
9K2	9	Staphylococcus epidermidis	Staphylococcus	Staphylococcus epidermidis
10K2	10	Staphylococcus epidermidis	Staphylococcus	Staphylococcus epidermidis
20K3	20	Staphylococcus epidermidis	Staphylococcus	Staphylococcus epidermidis
21K1	21	Staphylococcus epidermidis	Staphylococcus	Staphylococcus epidermidis
2K1	2	Staphylococcus epidermidis	Staphylococcus	Staphylococcus epidermidis
23K2	23	Staphylococcus hominis	Staphylococcus	Staphylococcus hominis
12K5	12	Staphylococcus hominis	Staphylococcus	Staphylococcus hominis
22K5	22	Staphylococcus hominis	Staphylococcus	Staphylococcus epidermidis
15T1	15	Staphylococcus lugdunensis	Staphylococcus	Staphylococcus lugdunensis
1T6	1	Staphylococcus pasteuri	Staphylococcus	Staphylococcus pasteuri
18F2	18	Staphylococcus spp. (epidermidis)	Staphylococcus	Staphylococcus epidermidis
16B1	16	Staphylococcus spp. (epidermidis)	Staphylococcus	Staphylococcus epidermidis
23K1	23	Staphylococcus spp. (epidermidis)	Staphylococcus	Staphylococcus epidermidis
12K6	12	Staphylococcus spp. (epidermidis)	Staphylococcus	Staphylococcus epidermidis
16B2	16	Staphylococcus spp. (warneri)	Staphylococcus	Staphylococcus warneri
16A7	16	Staphylococcus spp.(epidermidis)	Staphylococcus	Staphylococcus epidermidis
2K4	2	Staphylococcus warneri	Staphylococcus	Staphylococcus warneri
1T3	1	Staphylococcus warneri	Staphylococcus	Staphylococcus warneri
2T3	2	Stenotrophomonas maltophilia	Stenotrophomonas	Stenotrophomonas maltophilia
M5K3	5	Streptococcus mitis	Streptococcus	Streptococcus dentisani
13T4	13	Streptococcus mitis	Streptococcus	Streptococcus dentisani
1K9	1	Streptococcus mitis	Streptococcus	Streptococcus mitis
1T11	1	Streptococcus oralis	Streptococcus	Streptococcus dentisani
M11T6	11	Streptococcus salivarius	Streptococcus	Streptococcus salivarius
M33K2	33	Streptococcus salivarius	Streptococcus	Streptococcus salivarius
M29T8	29	Streptococcus salivarius	Streptococcus	Streptococcus salivarius
1K2	1	Streptococcus salivarius	Streptococcus	Streptococcus salivarius
21T1	21	Streptococcus urinalis	Streptococcus	Streptococcus urinalis
M1W7	1	Mycoplasma spp.	Cutibacterium	Cutibacterium acnes
M10W7	10	Mycoplasma spp.	Cutibacterium	Cutibacterium acnes
16C4	16	Mycoplasma spp.	Cutibacterium	Cutibacterium acnes
18H1	18	Mycoplasma spp.	Cutibacterium	Cutibacterium acnes
23W1	23	Mycoplasma spp.	Cutibacterium	Cutibacterium acnes
24W1	24	Mycoplasma spp.	Cutibacterium	Cutibacterium acnes
21W1	21	Mycoplasma spp.	Cutibacterium	Cutibacterium acnes
13W3	13	Mycoplasma spp.	Cutibacterium	Cutibacterium acnes
9W2	9	Mycoplasma spp.	Cutibacterium	Cutibacterium acnes
M1W1	1	Mycoplasma spp.	Kocuria	Kocuria kristinae
M10W1	10	Mycoplasma spp.	Cutibacterium	Propionibacterium avidum
M2W6	2	Mycoplasma spp.	Rothia	Rothia amarae
2W6	2	Mycoplasma spp.	Rothia	Rothia endophytica
M33K11	33	NRID (Streptococcus/Actinomyces)	Actinomyces	Actinomyces odontolyticus
M30K4	30	NRID (Staphylococcus)	Actinomyces	Actinomyces odontolyticus
M27K11	27	NRID (Anaerococcus)	Anaerococcus	Anaerococcus octavius
M27T1	27	NRID (Lactobacillus/Clostridium/Candida)	Corynebacterium	Corynebacterium appendicis
M3W1	3	NRID (Proteus/Sphingomonas/Agromyces)	Corynebacterium	Corynebacterium lowii
M3K9	3	NRID (Streptococcus/Lactobacillus/Corynebacterium)	Corynebacterium	Corynebacterium lowii
M3W4	3	NRID (Mycoplasma/Arthrobacter/Sphingomonas)	Corynebacterium	Corynebacterium lowii
M3K5	3	NRID (Lactobacillus/Aromatoleum/Arthrobacter)	Corynebacterium	Corynebacterium renale
M3K14	3	NRID (Tissierella/Corynebacterium)	Corynebacterium	Corynebacterium renale
M9W3	9	NRID (Corynebacterium/Mycoplasma)	Corynebacterium	Corynebacterium tuberculostearicum
13K14	13	NRID (Eggerthella/Streptococcus/Corynebacterium)	Corynebacterium	Corynebacterium tuberculostearicum
13W2	13	NRID (Mycoplasma/Corynebacterium)	Corynebacterium	Corynebacterium tuberculostearicum
M29K11	29	NRID (Propionibacterium)	Cutibacterium	Cutibacterium acnes
M5T10	5	NRID (Staphylococcus/Citrobacter/Lactobacillus)	Rothia	Rothia endophytica
1T1	1	NRID (Methylobacterium/Arthrobacter/Lactobacillus)	Rothia	Rothia terrae
M33K6	33	NRID (Staphylococcus)	Staphylococcus	Staphylococcus epidermidis
M26K15	26	NRID (Staphylococcus)	Staphylococcus	Staphylococcus epidermidis
M25K12	25	NRID (Staphylococcus)	Staphylococcus	Staphylococcus epidermidis
M32K13	33	NRID (Propionibacterium/Actinomyces)	Staphylococcus	Staphylococcus hominis
M34T3	34	NRID (Streptococcus)	Streptococcus	Streptococcus salivarius
NRID - no reliable identification (first three hits in parenthesis)
*Propionibacterium acnes is now reclassified as Cutibacerium acnes

## Sheet: Table S9
Table S9: Matching of MALDI-TOF genus identification with 16S Sanger sequencing.
MALDI-TOF genus identification	Abundance in human milk microbiota [%]*	Number of analysed colonies	16S genus identification match
Staphylococcus	51.2891	25	25
Streptococcus	12.9834	9	9
Propionibacterium	10.4052	8	8
NRID	6.99816	20	6**
Mycoplasma	3.8674	13	0
Corynebacterium	3.68324	3	3
Rothia	1.4733	2	2
Actinomyces	1.28913	1	1
Ochrobactrum	1.28913	2	2
Klebsiella	1.01289	1	1
Acinetobacter	0.828729	1	1
Bifidobacterium	0.736648	3	3
Lactobacillus	0.736648	4	4
Kocuria	0.644567	1	1
Stenotrophomonas	0.460405	1	1
Rhizobium	0.368324	0	0
Enterobacter	0.276243	1	1
Finegoldia	0.276243	0	0
Gemella	0.276243	1	1
Escherichia	0.184162	0	0
Micrococcus	0.184162	0	0
Moraxella	0.184162	0	0
Bacillus	0.092081	0	0
Brevibacterium	0.092081	0	0
Brevundimonas	0.092081	0	0
Dermabacter	0.092081	0	0
Pseudomonas	0.092081	0	0
Veillonella	0.092081	0	0
NRID - no reliable identification
*determined with culture technique
**If matches with first hit in MALDI-TOF identification

[truncated: 3 more sheets: Table S10, Table S11, Table S12]
